# Supplementary material
Source: PubMed Central journal article supplement (PMC10592653)
Supplement: NIHMS1904766-supplement-supinfo.pdf [file NIHMS1904766-supplement-supinfo.pdf]

## Supplementary Materials

**Supplementary Appendix (see separate file):** Details on the characterization of different criteria included in this study

**Supplementary Methods.** Additional details on cohort construction, definitions of specific criteria, and statistical analysis plan.

**Supplementary Table S1:** Classification of potentially problematic medication use for over-aggressive treatment of hypertension (i.e., average systolic blood pressure <110 during enhanced face to face interview and on certain antihypertensives without clear alternative reason)

**Supplementary Table S2:** Classification of strongly anticholinergic medication use based on the 2019 Beers criteria Table 7

**Supplementary Table S3:** Classification of sedative-hypnotic medications based on previous studies and the Sedative Load Model

**Supplementary Table S4:** Criteria that were excluded in a sensitivity analysis to compare persons with and without dementia based on only those criteria that were the same in each groups

**Supplementary Table S5:** Number of individuals classified as having dementia by year

**Supplementary Table S6:** Frequency and mean number of potentially problematic medications among community-dwelling older adults with and without dementia overall and across the different domains in the primary cohort matched on age, sex, comorbidity count, and year of assessment

**Supplementary Table S7:** Number and survey weighted percentage of persons with diabetes and hypertension who met criteria for over-aggressive treatment of these conditions in the primary cohort matched on age, sex, comorbidity count, and year of assessment

**Supplementary Table S8:** Baseline characteristics of community-dwelling older adults with and without dementia enrolled in the Health and Retirement Study from 2008-2018 in the cohort matched only on year of assessment

**Supplementary Table S9:** Baseline characteristics of community-dwelling older adults with and without dementia enrolled in the Health and Retirement Study from 2008-2018 in the fully matched cohort

**Supplementary Table S10:** Frequency and mean number of potentially problematic medications among community-dwelling older adults with and without dementia overall and across the different domains in the cohort matched only on year of assessment

**Supplementary Table S11:** Frequency and mean number of potentially problematic medications among community-dwelling older adults with and without dementia overall and across the different domains in the fully matched cohort

**Supplementary Table S12:** Frequency and mean number of potentially problematic medications among community-dwelling older adults with and without dementia overall and across the different domains using propensity score matching and inverse probability of treatment weighting

**Supplementary Table S13:** Frequency and mean number of potentially problematic medications among community-dwelling older adults with and without dementia overall and across the different domains in the primary matched cohort including and excluding criteria that are specific to individuals with dementia

**Supplementary Table S14:** Frequency and mean number of potentially problematic medications among community-dwelling older adults with and without dementia overall and in the medication overuse domain in the primary matched cohort and a separate matched cohort in which the non-dementia controls were not preferentially selected based on presence of enhanced face to face interview

**Supplementary Table S15:** Results from the index of local sensitivity to nonignorability (ISNI) method for the linear regression model for systolic blood pressure and hemoglobin A1c

**Supplementary Table S16:** Frequency and mean number of potentially problematic medications among community-dwelling older adults with and without dementia overall and in the over-aggressive treatment of chronic conditions sub-domain for the primary cohort comparing methods using multiple imputation (MI) (primary analysis) and the index of local sensitivity to nonignorability (ISNI) (sensitivity analysis)

**Supplementary Figure S1:** Example outline of cohort entry and timing of medication assessment for an individual enrolled in the Health and Retirement study

**Supplementary Figure S2:** Flow chart of individuals aged 66 years and older with and without dementia in the Health and Retirement Study from 2008-2018 included in this study

**Supplementary Figure S3:** Distribution of the number of potentially problematic medications identified across all criteria among persons with and without dementia in the primary matched cohort

**Supplementary Figure S4:** Histograms representing the distribution of systolic blood pressure and hemoglobin A1c values under the different methods, including index of local sensitivity to nonignorability (ISNI), multiple imputation, and non-missing observed data

## Supplementary Methods

### Cohort construction:

Supplementary Figure S1 shows the flow chart used to identify individuals included in the study. We identified persons with dementia (PWD) based on a previously validated algorithm developed by Hurd et al.<sup>1</sup> This algorithm was developed using data from the Aging, Demographics, and Memory Study (ADAMS), a sub-study from the 2000 and 2002 waves of the Health and Retirement Study (HRS) in which a random sample of participants aged 70 years and older underwent full neuropsychological evaluations.<sup>2</sup> An ordered probit model was developed using predictors such as age, sex, education, cognitive test results, and physical functioning to classify individuals in subsequent HRS waves as having dementia. We used a predicted dementia probability  $>0.5$  with this algorithm to classify individuals as having probable dementia. This algorithm has been shown to have good accuracy in validation studies.<sup>3</sup>

Once an individual was classified as having dementia at a specific HRS interview wave, that individual was then classified as having dementia for all subsequent interview waves. For individuals classified as having dementia with only one interview wave available, we used this interview wave as the index date to obtain medication information in the previous year. For individuals with multiple HRS interview waves having a classification of dementia, we randomly selected one of their interview waves to use as the index interview wave for which all medication information was obtained in the year prior. We prioritized the waves in which the individual was selected for the enhanced face to face interview as this would allow us to collect information on their hemoglobin A1c, cystatin C, and systolic blood pressure if the patient had these measured.

An individual could have been in the control pool during earlier HRS interview waves (probability of dementia using the Hurd algorithm  $<0.5$  indicating no classification of dementia)

before later having a classification of dementia during a later wave (dementia probability  $>0.5$  indicating classification of dementia). Once the individual had a classification of dementia at an HRS interview wave, they were no longer eligible for the control pool in subsequent years. For example, an individual who was interviewed in 2008 and 2010 and not classified as having dementia would be included in the control pool for those time points but would be included in the dementia pool if they were classified as having dementia at the 2012 HRS interview wave.

After applying our inclusion and exclusion criteria, a total of 9,844 distinct individuals were ultimately eligible. From this cohort, 1,475 distinct individuals were classified as having dementia at least once during the study period based on the dementia classification algorithm. There were 9,199 individuals who were ultimately included in the control pool (individuals without classification of dementia). The sum of these numbers ( $1,475 + 9,199 = 10,674$ ) is greater than 9,844 as some individuals were included first in the control cohort and later in the dementia cohort.

#### Classification of medication overuse

We identified individuals for the over-aggressive treatment of hypertension criterion based on an average systolic blood pressure  $<110$  with a prescription for certain antihypertensives. We applied a series of exclusion criteria to ensure they did not have an alternative indication for an antihypertensive even with an average systolic blood pressure  $<110$ . This may occur for individuals with heart failure with reduced ejection fraction on a beta-blocker, angiotensin converting enzyme inhibitor, or spironolactone. This may also occur for individuals with atrial fibrillation on a beta blocker which is used for rate control rather than blood pressure. Therefore, we checked if individuals had certain combinations of comorbidities prior to them being flagged as receiving a potentially problematic medication in the setting of

average systolic blood pressure <110. We first excluded alpha-1 blockers such as doxazosin, prazosin, and terazosin and loop diuretics since these medications are often not used explicitly for hypertension (i.e., commonly used for benign prostatic hyperplasia, posttraumatic stress disorder, and edema in the setting of chronic kidney disease or heart failure). We then split individuals into 8 mutually exclusive groups based on the presence of 1) cardiac conditions, 2) arrhythmias, and 3) chronic kidney disease or diabetes. We used the Clinical Classifications Software (CCS) to map International Classification of Diseases (ICD)-9 and -10 codes onto categories of conditions. Cardiac conditions were defined as a diagnosis code for essentially any heart condition other than essential hypertension. This was to be as conservative as possible when flagging a medication as potentially problematic based on this criteria. This included ICD9 CCS 7.1.2 (HTN with complications), 7.2 (disease of the heart) except for 7.2.9 (cardiac dysrhythmias), CCS procedure codes 7.2, 7.3 and ICD10 CCS CIR001-CIR006, CIR008-CIR016, CIR018-CIR019 (excludes CIR007 = essential hypertension and CIR017 = cardiac dysrhythmias). Arrhythmias were generally defined as atrial fibrillation, atrial flutter, or supraventricular tachycardia using diagnosis codes ICD 9 427.0, 427.3 or ICD10 I47.1, I48\*. Chronic kidney disease and diabetes were defined using diagnosis codes ICD 9 CCS 3.2 & 3.3 (diabetes), 10.1.3, 10.1.2.2 (chronic renal failure) and ICD10 CCS END 002-END006 (diabetes), GEN003 (chronic kidney disease).

Finally, we characterized potentially problematic medication use based on the presence or absence of these diagnosis codes. The 8 mutually exclusive groups are shown in Supplementary Table S1 where 1 = condition present based on diagnosis codes and 0 = absent based on diagnosis codes. The bullet points list the medications that were considered potentially inappropriate for each group.

If an individual who met the criteria for over-aggressive treatment of hypertension or diabetes was on multiple antihypertensive or antidiabetic agents, we ultimately decided to randomly flag one of the medications. For example, an individual with an average systolic blood pressure of 105 who was on metoprolol, amlodipine, and hydrochlorothiazide without any other identifiable diagnosis codes that would indicate these medications may be potentially appropriate, we would randomly select one of these medications as indicative of over-aggressive treatment of hypertension. We did this because we felt it would be unfair to identify all 3 medications as potentially problematic. Similarly, for an individual with diabetes who had a hemoglobin A1c of 7.0% and was on insulin and glipizide, we randomly flagged one of these medications as potentially problematic.

We recognize that this classification system is not perfect, and some medications identified as potentially problematic may be reasonable choices based on individual circumstances. We also did not factor in dose modifications for medications like insulin in the setting of hemoglobin A1c <7.5%. However, our aim was to identify medications often considered overused and frequently represent high-value candidates to consider for discontinuation.

#### Classification of medications that negatively affect cognition

Medications classified as those that negatively affect cognition included strongly anticholinergics and sedative-hypnotics. Strongly anticholinergic medications included those in Table 7 of the 2019 Beers criteria as shown in Supplementary Table S2.<sup>4</sup> Multiple tools have been developed for classifying medications based on anticholinergic burden, such as the Anticholinergic Cognitive Burden (ACB) scale and Anticholinergic Risk Scale (ARS).<sup>5</sup> We ultimately settled on the medications listed in Table 7 of the 2019 Beers criteria as this represents

common medications with strong anticholinergic properties. These included various antidepressants, antiemetics, antihistamines, antimuscarinics, antiparkinsonian agents, antipsychotics, antispasmodics, and skeletal muscle relaxants. While these medications overlap with the 2019 Beers criteria sub-domain, we ensured that each medication was only flagged once when computing the overall results for frequency and mean.

Medications classified as sedative-hypnotics are shown in Supplementary Table S3. There are comparatively fewer sedative burden scales with the most prominent being the Sedative Load Model (SLM).<sup>6,7</sup> This model classifies drugs into no, low, moderate, or high sedative potency based on clinical expertise. Based on the SLM and in line with a previous study of polypharmacy among older adults with and without dementia, we included medications such as benzodiazepines, nonbenzodiazepine hypnotics, selected antiepileptic drugs, selected antipsychotics, selected antihistamines, and doxepin.<sup>8</sup>

#### Classification of medications to avoid based on specific criteria

Operationalizing the 2019 American Geriatrics Society Beers criteria and Screening Tool of Older Persons' Prescriptions (STOPP) Version 2 criteria using only claims data can often be challenging. Previous attempts have been made to apply the STOPP Version 2 criteria using only electronic health record data.<sup>9,10</sup> While we generally followed the guidance from this multidisciplinary consensus procedure, we chose a more conservative approach. For example, we excluded criteria such as avoiding “Amiodarone as first-line antiarrhythmic therapy in supraventricular tachyarrhythmias” or “Beta-blockers in diabetes mellitus with frequent hypoglycemic episodes.” These criteria could be operationalized based on the absence of prescriptions of first-line antiarrhythmics in the year prior (e.g., beta-blockers) or the presence of

diagnosis code for hypoglycemia. However, we felt that this would not be a fair representation of inappropriate medication use in the absence of additional clinical information.

#### Overlapping medication criteria

A few criteria involved flagging medications as potentially problematic if they were used in combination (e.g., overlapping use of benzodiazepines and opioids). For these criteria, for each medication prescription we looked at the prescription fill day and days supply to specify a date range for when the medication may be in use. We recognize that this is not perfect as individuals may fill a medication but not take it for several weeks after that. However, this is a limitation inherent in pharmacoepidemiology research using prescription fill information. For the medications in question (e.g., benzodiazepine and opioid), we flagged them as using in combination if the date ranges for the individual medications overlapped for at least 7 days. We chose a 7 day overlap period as some of these medications may only be prescribed for short courses or for as needed use (e.g., 1 time prescription for 1 pill of lorazepam prior to a flight or MRI scan).

#### Chronic medication criteria

We operationalized a few criteria based on chronic use which was variably defined (e.g., proton pump inhibitor use for >8 weeks, non-steroidal anti-inflammatory drug (NSAID) use for >3 months or NSAID use for >1 month with a diagnosis code of heart failure). The definitions of chronic medication use varied slightly. For example, to ascertain that an individual was on a medication for >8 weeks, we required 2 consecutive fills in the past year that were filled within 30 days of each other with at least 28 days per fill. We also included a single fill with a day supply greater than 8 weeks (i.e., >56 days).

#### Chronic kidney disease criteria



Several criteria involved identifying potentially problematic medications based on an individual's creatinine clearance (CrCl). For example, both the 2019 Beers and STOPP Version 2 criteria have sections on medications that should be avoided in chronic kidney disease (CKD). The 2019 Beers criteria recommends avoiding duloxetine if CrCl <30 and reducing the dose of gabapentin if CrCl <60. We included most criteria that recommending avoiding medications based on a CrCl cut-off and excluded those that recommended reducing the dose as these were challenging to operationalize.

To ascertain an individual's kidney function for these criteria, we looked at both diagnosis codes for CKD and an individual's cystatin C if available from the enhanced face to face interview. The CKD diagnosis codes are all based on estimated glomerular filtration rate (eGFR) cut-offs. Similarly, cystatin C allows for the calculation of eGFR. While CrCl and eGFR are not equivalent, for our purpose, we considered them roughly similar. We used the CKD-Epi cystatin C formula to convert the cystatin C values available to an eGFR as follows:  $eGFR = 133 \times \min(\text{Scys}/0.8, 1) - 0.499 \times \max(\text{Scys}/0.8, 1) - 1.328 \times 0.996 \text{Age} \times 0.932$  [if female] where eGFR = mL/min/1.73 m<sup>2</sup>, Scys (standardized serum cystatin C) = mg/l, min = indicates the minimum of Scys/0.8 or 1, max = indicates the maximum of Scys/0.8 or 1, and age = years.

#### Methods to handle missing data

For the sub-domain of over-aggressive treatment of diabetes and hypertension, many individuals did not have an available hemoglobin A1c (HbA1c) or systolic blood pressure (SBP) measured. These values were collected during the enhanced face to face interview in the Health and Retirement Study. Among the 1,441 individuals without dementia in the primary matched cohort, 1,441 (100%) had a SBP measured and 1,074 (75%) had a HbA1c measured. Among the 1,441 individuals with dementia in the primary matched cohort, 538 (37%) had a SBP measured

and 381 (26%) had a HbA1c measured. Given that the control pool of persons without dementia was larger and we prioritized individuals who had an enhanced face to face interview, we were able to identify a higher percentage of persons without dementia who had an available SBP or HbA1c measured.

Due to the amount of missingness in SBP and HbA1c, ignoring the missing measures would lead to cohort selection bias and sample size reduction, reducing the study power and skewing the results for the sub-domain of over-aggressive treatment of diabetes and hypertension. To handle the missing data, we applied the multiple imputation (MI) method to fill in the missing SBP and A1c. We also conducted a sensitivity analysis using the index of local sensitivity to nonignorability (ISNI) (see sensitivity analysis section below).

### Multiple Imputation

For the primary analysis, we used multiple imputation to create 10 complete datasets. The missing SBP and HbA1c were drawn from the two conditional distributions, where

$$\text{SBP} | X_1, X_2, \dots, X_{22} \sim \mathbb{N}(\mu_1, \sigma_1^2),$$

$$\text{HbA1c} | X_1, X_2, \dots, X_{22} \sim \mathbb{N}(\mu_2, \sigma_2^2).$$

$X_1, X_2, \dots, X_{22}$  are the covariates listed in Supplementary Table S15. After the imputing step, we linked the 10 imputed datasets to an individual's medications and identified the overuse medication cases across all 10 datasets. Then we produced the mean, frequency of overuse, odds ratio, and incidence rate ratio for dementia vs non-dementia groups through a pooling step where we combined the parameter estimate and standard error from each imputed dataset for the final inference. MI is highly precise and efficient. The random draw for the missing data from the conditional distribution produces unbiased estimates. The pooling step captures the missing data

uncertainty and sampling variation, rendering high coverage probability for the parameter estimation.<sup>11</sup> We used the SAS PROC MI procedure to conduct the multiple imputation.

### Sensitivity analyses

We performed several sensitivity analyses to examine the robustness of our findings. First, we created 2 additional matched cohorts: first matched only on year of assessment and another matched on several additional factors. For the first cohort, we 1:1 matched individuals with a classification of dementia to those without a classification of dementia based only on their year of assessment. In the second cohort, we 1:1 matched individuals with and without dementia by year of assessment, age, sex, comorbidity count, race/ethnicity, education, marital status, lives alone, Medicaid eligibility, body mass index, smoking status, region of country, hospitalization or emergency department visit in the past year, outpatient visits in the past year, activities of daily living (ADL) difficulty score, and instrumental ADL (IADL) difficulty score.

Second, we used inverse probability of treatment weighting (IPTW) instead of propensity score matching to calculate the results in the primary cohort. IPTW involves comparing individuals with and without dementia in the sample weighted by the inverse probability of treatment (where in this case “treatment” indicates the presence of dementia). IPTW uses the entire cohort, and each individual is assigned a weight based on the likelihood that they have dementia.

Third, we considered alternative ways of including certain criteria that were either 1) different between individuals with and without dementia or 2) only apply to individuals with dementia since this would lead to a higher number of flagged medications in those with dementia (Supplementary Table S4). For example, STOPP Version 2 D1 which advises to stop tricyclic antidepressants with dementia, narrow angle glaucoma, cardiac conduction abnormalities,

prostatism, or prior history of urinary retention would apply to everyone in the dementia cohort and only those with the certain medical conditions in the non-dementia cohort. Similarly, STOPP Version 2 D9 which recommends stopping antipsychotics in patients with behavioral and psychological symptoms of dementia would only apply to individuals with dementia. Including these criteria could create an unfair comparison between those with and without dementia. In our primary analysis for the overall mean number of flagged medications and percentage of individuals with at least 1 flagged medication, we excluded these criteria to avoid this unfair comparison. As a sensitivity analysis, we included these criteria when calculating the overall measure to see how our results changed. In our primary analysis for the individual domains (e.g., medications to avoid based on specific criteria such as 2019 Beers/STOPP Version 2), we included the criteria that were specific to individuals with dementia. As a sensitivity analysis, we excluded these criteria when calculating the individual domain measures.

Fourth, we repeated an analysis in which the non-dementia cohort was not preferentially selected based on the presence of an enhanced face-to-face (EFTF) interview. In 2006, HRS initiated EFTF interviews which included additional measures such as physical performance tests and blood samples. At each HRS interview wave, half of the sample is assigned an EFTF interview. This alternates every wave such that the EFTF interview is available every 4 years at the individual level. When constructing the control pool involving individuals without dementia, we decided to preferentially select individuals who had an EFTF interview. We did this so that we could maximize the number of people with an available hemoglobin A1c, systolic blood pressure, and cystatin C to ascertain information on potentially problematic medication use in the medication overuse domain. While assignment to an EFTF interview is random and alternates every other HRS interview wave, individuals who complete the EFTF interview (with blood

draw and SBP measured) may differ than those who do not (e.g., if they declined the EFTF interview when given the opportunity). Therefore, we repeated the analysis in which the control pool (individuals without dementia) was not preferentially selected based on the presence of an EFTF interview.

Fifth, we conducted an index of local sensitivity to nonignorability (ISNI) sensitivity analysis as explained below to assess the robustness of the multiple imputation procedure.

### ISNI Sensitivity Analysis

#### a. Rationale

While MI is one of the most common and widely used missing data methods, its validity is built upon one key assumption: ignorability. That is, the missing data mechanism (MDM) follows the missing at random (MAR) assumption; the parameters for the observed data ( $\theta$ ) and missing data ( $\varphi$ ) are distinct.<sup>12</sup> The missing data follows the MAR assumption if the probability of missingness only depends upon the observed variables.<sup>13</sup> When ignorability holds, we can directly draw inferences from the observed data without modeling the MDM. In our study, we assumed the missing SBP and HbA1c were MAR and implemented the MI method for the analyses. The MAR assumption is usually unverifiable. When the MDM pivots from MAR to missing not at random (MNAR), the probability of missingness is related to both observed and unobserved data, and the MI method is no longer robust as it produces biased parameter estimation.<sup>11</sup> Therefore, incorrectly assuming MAR can negatively impact the research results, and it is important to conduct a sensitivity analysis that compares the estimates and inference results once the missing mechanism departs from MAR to MNAR.

#### b. Theoretical outline

The ISNI method is a principled sensitivity index method that evaluates the reliability of the analysis under the MAR assumption. When the missingness is MNAR, the missing mechanism can no longer be ignored. That is, one must model the observed and missing data jointly to draw valid and robust parameter estimates and inferences. Nevertheless, fitting a nonignorable missing data model is both conceptually and computationally challenging. Moreover, it was not in our primary interest to model the missingness. On the other hand, the ISNI method provides a fast-implemented easy-to-use method that requires fitting no nonignorable models. Starting with the MAR model, ISNI measures the deviation of the parameter estimates when the MDM changes from MAR to MNAR. A general ISNI sensitivity method outline works like this:

1. Let  $G_i$  be the missing indicator for the outcome  $Y_i$ .  $G_i=1(0)$  if  $Y_i$  is missing (or observed).

We model the missing indicator (MDM) via a selection model, where  $G$  is conditional on both observed and unobserved outcomes ( $Y^{obs}$ ,  $Y^{mis}$ ). The probability density function (PDF) for  $G|Y$  is denoted as  $f_Y^{G|Y}(g|y)$ .

2. We introduce the parameter,  $\gamma$ , for modeling the MDM.  $\gamma$  is broken down as  $\gamma_0$  and  $\gamma_1$ , where  $\gamma_0$ ,  $\gamma_1$  reflect the effects on the probability of missingness from the fully observed  $Y^{obs}$  and potentially unobserved  $Y^{mis}$ . Therefore, the PDF is denoted as

$f_{\gamma_0, \gamma_1}^{G|Y}(g|y^{obs}, y^{mis})$ . Since we often model the observed outcomes with a set of covariates ( $Y^{obs}=X\beta$ ) for the MAR model,  $\gamma_0$  can also refer to the set of coefficients for the fully observed covariates for missingness.

3. For example, we model  $G|Y^{obs}, Y^{mis}$  via a logistic regression model, which is specified as follows:

$$\ln \left( \frac{P(G_i=1)}{1-P(G_i=1)} \right) = \gamma_0 X + \gamma_1 Y_i^{mis}.$$

Here  $\gamma_1$  is referred to as a nonignorable parameter. When  $\gamma_1 = 0$ , the missing probability does not depend on the missing outcome hence the model reduces to ignorable missingness (MAR model); when  $\gamma_1 \neq 0$ , the missing probability depends upon the missing outcome hence the missingness is nonignorable (MNAR model).

4. When the missingness is nonignorable, one must model the joint likelihood for both observed data and the missing data. As aforementioned,  $\theta$  denotes the parameter governing the complete observed data. Therefore, the joint log-likelihood function is specified as

$$L(\theta, \gamma_0, \gamma_1; y^{obs}, g) = \ln \int_{\Omega_{y^{mis}}} f_{\theta}^Y(y^{obs}, y^{mis}) f_{\gamma_0, \gamma_1}^{G|Y}(g|y^{obs}, y^{mis}) dy^{mis}$$

5. ISNI measures the rate of change from  $\hat{\theta}(\gamma_1)$  to the MAR estimator  $\hat{\theta}(\gamma_1 = 0)$ . To identify the optimal value of  $\theta$ , we take the derivative of the jointly log likelihood function with respect to  $\theta$ , resulting in a function of  $\theta$  and  $\gamma_1$ . ISNI in calculation is defined as the derivative  $\frac{\partial \hat{\theta}(\gamma_1)}{\partial \gamma_1}$  evaluated at  $\gamma_1 = 0$ , which measures the rate of deviation in  $\hat{\theta}(\gamma_1)$  from the standard MAR estimate  $\hat{\theta}(0)$ .<sup>14</sup> The mathematical expression for ISNI is

$$ISNI = \frac{\partial \hat{\theta}(\gamma_1)}{\partial \gamma_1} = -\nabla^2 L_{\theta, \theta}^{-1} \nabla^2 L_{\theta, \gamma_1},$$

Where  $\nabla^2 L_{\theta, \theta} = \frac{\partial^2 L(\theta, \gamma_0, \gamma_1)}{\partial \theta \partial \theta^T} = \frac{\partial^2 f_{\theta}(y^{obs})}{\partial \theta \partial \theta^T} \Big|_{\hat{\theta}(0), \hat{\gamma}_0(0), \gamma_1=0}$  represents the Fisher's

information, the inverse variance-covariance matrix of the MAR estimate  $\hat{\theta}(0)$ ;

$\nabla^2 L_{\theta, \gamma_1} = \frac{\partial^2 L(\theta, \gamma_0, \gamma_1)}{\partial \theta \partial \gamma_1} \Big|_{\hat{\theta}(0), \hat{\gamma}_0(0), \gamma_1=0}$  represents the level of nonorthogonality of  $\theta$  and  $\gamma_1$

and can be evaluated by the readily available MAR estimates  $\hat{\theta}(0)$  and  $\hat{\gamma}_0(0)$ .

When applying the ISNI method for the sensitivity analysis, we impose a plausible range of values for  $\gamma_1$  which allows the ignorable model (MAR) to pivot to nonignorable model (MNAR), and examine the extent of the change in  $\hat{\theta}(\gamma_1)$ . For example, when  $\gamma_1 = 1$ ,  $ISNI \approx \hat{\theta}(1) - \hat{\theta}(0)$ , where  $\hat{\theta}(0)$  is the maximum likelihood estimator (MLE) from the MAR estimate. In general, we impose  $\gamma_1 = \pm 1$  to allow the model to pivot locally in the nonignorable direction.

6. When  $\gamma_1 \neq 0$ , we can approximate the parameter estimate as  $\hat{\theta}(\gamma_1) \approx \hat{\theta}(0) + ISNI \cdot \gamma_1$ . Although ISNI measures the rate of change in parameter estimate when the model pivots from MAR to MNAR, it does not infer the level of significance for the parameter change. To gauge whether a change in the MLE estimate is significant, we define the index ‘minimum degree of nonignorability’, MinNI (also previously known as c index in Troxel 2004),<sup>14</sup> specified as

$$\text{MinNI} = \left| \frac{\sigma_Y SE}{ISNI} \right|,$$

where  $\sigma_Y$  is the standard deviation of the observed outcome, and SE is the standard error of  $\hat{\theta}(0)$ . We consider a one-SE change in the MAR estimate to be significant ( $\hat{\theta}(\gamma_1) = \hat{\theta}(0) + SE_{\theta}$ ). Given the parameter approximation under nonignorable model,  $\frac{ISNI}{SE_{\theta}} = 1$ .

The ratio  $> 1$  would indicate that the estimate is highly subject to nonignorable missingness.

Recall the selection model in step 3,  $\gamma_1 = 1$  indicates that one unit increase in  $y$  is associated with a 2.7-fold ( $e^1$ ) increase in odds of being missing. This interpretation is valid when the outcome is categorical or count; however, when  $y$  is a continuous variable and has different scale, such as SBP reading or HbA1c, one unit increase in SBP or HbA1c has the same increase



in the odds of being missing but, SBP and HbA1c had different range values, and a slight change in  $y$  relative to its entire range can be associated with a substantial change in the probability of missingness. Therefore, instead of one-unit change in  $y$ , we consider one standard deviation ( $\sigma_Y$ ) increase in  $y$  is associated with 2.7-fold odds increase. That is, we vary  $\gamma_1$  from  $-\frac{1}{\sigma_Y}$  to  $\frac{1}{\sigma_Y}$ , and examine the parameter estimate  $\hat{\theta}(0) \pm ISNI \cdot \frac{1}{\sigma_Y}$ . Furthermore, we proposed the MinNI that quantify the level of  $\sigma_Y$ . That is, a change of 1/MinNI standard deviation of  $y$  is associated in the increase odds of 2.7 for being missing. Therefore,

$$ISNI \cdot \frac{MinNI}{\sigma_Y} / SE_{\theta} = 1 \rightarrow MinNI = \left| \frac{\sigma_Y SE_{\theta}}{ISNI} \right|$$

MinNI is scale independent. A small MinNI means modest nonignorable missingness could lead to sensitivity; a large MinNI means only extreme level of nonignorability could it induce the sensitivity. Troxel (2004) suggested that using  $MinNI < 1$  as threshold for nonignorable sensitivity.<sup>14</sup>

### c. Application

Assuming MAR, we fit two linear regression models for SBP and HbA1c. With the moderate amount of missing data, we conducted sensitivity analysis that two logistic regression models were adopted the missing model, specified as

$$\ln \frac{P(G_i = 1)}{1 - P(G_i = 1)} = (X_1 + X_2 + \dots, X_{22})_i^T \gamma_0 + \gamma_1 \cdot SBP;$$

$$\ln \frac{P(G_i = 1)}{1 - P(G_i = 1)} = (X_1 + X_2 + \dots, X_{22})_i^T \gamma_0 + \gamma_1 \cdot HbA1c.$$

We used the R package “isni” to conduct the sensitivity analysis. Columns “MAR Est.” and “Std. Error” in Supplementary Table S15 represent the regression coefficient estimates and standard errors, respectively. The results suggest that age, male, smoking status, education level,

hospitalization, South region, arthritis, cancer, heart disease, hypertension, lung disease were significant predictors for SBP; male, race, living status, college and above education, >1 hospitalization, >1 ER visits, heart disease, and diabetes were significant predictors for HbA1c. Baseline SBP (intercept), activities of daily living (ADL) dependencies, instrumental activities of daily living (IADL) dependencies, and college and above level of education were all sensitive to nonignorable missingness, as the MinNI values were less than 1. Under the MAR model, controlling for all other variables, the baseline SBP (intercept) was 95.27. However, when the missingness pivots to MNAR, the baseline SBP should be adjusted upwards by  $95.27 + 222.74/19.72=106.57$  (19.72 is the standard deviation of SBP). Therefore, the MAR model underestimated the true intercept (based on the observable values) compared to the estimate from the nonignorable selection model. One unit increase in ADL/IADL dependency would decrease SBP by 0.26 and 0.18 using the MAR model. Under the nonignorable model, both estimates were adjusted upwards by 5.56/1.17 and 8.19/0.95. Hence, one unit increase in ADL/IADL dependency would increase SBP by 4.51  $(-0.26 + 5.56/1.17)$  and 8.43  $(-0.18 + 8.19/0.95)$ . Moreover, patients with college and above level of education in comparison to less than high school education should have on average a SBP that is 2.86 lower, and the nonignorable model further adjusts it downwards by 11.62. On the other hand, no MinNI value was less than one in the HbA1c selection model.

### Comparing the results of MI and ISNI

We used the ISNI adjusted coefficient estimates to predict the missing SBP and HbA1c. Then we compared the ISNI predicted results to multiple imputed results. Supplementary Figure S3 demonstrates the histograms of the SBP and HbA1c under ISNI predicted, multiple imputed (10 datasets), and non-missing observed data.

The SBP and HbA1c values under the three methods overlapped. The ISNI predicted SBP tended to overestimate the true value of SBP (mean SBP was shifted to the right). However, it was still within the range of multiple imputed values. Therefore, despite the nonignorable parameters, the SBP outcomes showed similar distribution under the two methods.

As shown in Supplementary Table S16, results for the percentage of individuals with at least 1 problematic medication and mean number of problematic medications per person in the “over-aggressive treatment of chronic condition domain” were comparable between the MI and ISNI analyses. No significant differences in IRR and OR were found between the matched cohorts of persons with dementia and persons without dementia. The overall medication results were also similar between the MI and ISNI analyses. This provided evidence that the MI results were robust for the analysis.

**Supplementary Table S1:** Classification of potentially problematic medication use for over-aggressive treatment of hypertension (i.e., average systolic blood pressure <110 during enhanced face to face interview and on certain antihypertensives without clear alternative reason)

| Mutually exclusive groups <sup>a</sup>                  | Potentially problematic medication                                                                                                                                                                                                                              |
|---------------------------------------------------------|-----------------------------------------------------------------------------------------------------------------------------------------------------------------------------------------------------------------------------------------------------------------|
| 1. Heart condition = 1 + SVT = 0 + CKD = 0 <sup>b</sup> | Aliskiren<br>Antiadrenergic antihypertensives (excluding doxazosin, prazosin, terazosin)<br>Vasodilators (excluding isosorbide-hydralazine combination)<br>Thiazide and thiazide-like diuretics                                                                 |
| 2. Heart condition = 0 + SVT = 1 + CKD = 0              | CCBs other than verapamil/diltiazem<br>ACEi<br>ARB<br>Aliskiren<br>Antiadrenergic antihypertensives (excluding doxazosin, prazosin, terazosin)<br>Eplerenone<br>Potassium sparing diuretics<br>Vasodilators<br>Thiazide and thiazide-like diuretics<br>Nitrates |
| 3. Heart condition = 0 + SVT = 0 + CKD = 1              | Beta-blockers<br>CCBs<br>Aliskiren<br>Antiadrenergic antihypertensives (excluding doxazosin, prazosin, terazosin)<br>Eplerenone<br>Potassium sparing diuretics<br>Vasodilators<br>Thiazide and thiazide-like diuretics<br>Nitrates                              |
| 4. Heart condition = 1 + SVT = 1 + CKD = 0              | Aliskiren<br>Antiadrenergic antihypertensives (excluding doxazosin, prazosin, terazosin)<br>Vasodilators (excluding isosorbide-hydralazine combination)<br>Thiazide and thiazide-like diuretics                                                                 |
| 5. Heart condition = 1 + SVT = 0 + CKD = 1              | Aliskiren<br>Antiadrenergic antihypertensives (excluding doxazosin, prazosin, terazosin)<br>Vasodilators (excluding isosorbide-hydralazine combination)<br>Thiazide and thiazide-like diuretics                                                                 |
| 6. Heart condition = 0 + SVT = 1 + CKD = 1              | CCBs other than verapamil/diltiazem<br>Aliskiren<br>Antiadrenergic antihypertensives (excluding doxazosin, prazosin, terazosin)<br>Eplerenone<br>Potassium sparing diuretics                                                                                    |

|                                            |                                                                                                                                                                                                                                                   |
|--------------------------------------------|---------------------------------------------------------------------------------------------------------------------------------------------------------------------------------------------------------------------------------------------------|
|                                            | Vasodilators<br>Thiazide and thiazide-like diuretics<br>Nitrates                                                                                                                                                                                  |
| 7. Heart condition = 1 + SVT = 1 + CKD = 1 | Aliskiren<br>Antiadrenergic antihypertensives (excluding doxazosin, prazosin, terazosin)<br>Vasodilators (excluding isosorbide-hydralazine combination)<br>Thiazide and thiazide-like diuretics                                                   |
| 8. Heart condition = 0 + SVT = 0 + CKD = 0 | Beta-blockers<br>CCBs<br>ACEi<br>ARB<br>Aliskiren<br>Antiadrenergic antihypertensives (excluding doxazosin, prazosin, terazosin)<br>Eplerenone<br>Vasodilators<br>Potassium sparing diuretics<br>Thiazide and thiazide-like diuretics<br>Nitrates |

Abbreviations: ACEi, angiotensin converting enzyme inhibitor; ARB, angiotensin receptor blocker; CCB, calcium channel blocker; CKD, chronic kidney disease; SVT, supraventricular tachycardia

a Mutually exclusive groups were created as the medications that were considered eligible to be flagged as potentially problematic varied based on diagnosis codes. The number “1” indicates that the condition was present based on diagnosis codes, and the number “0” indicates that the condition was absent based on diagnosis codes.

b See the supplementary methods for definitions of these conditions. For example, “heart conditions” were defined as a diagnosis code for essentially any heart condition other than essential hypertension. This was to be as conservative as possible when flagging a medication as potentially problematic based on this criteria. This included ICD9 CCS 7.1.2 (HTN with complications), 7.2 (disease of the heart) except for 7.2.9 (cardiac dysrhythmias), CCS procedure codes 7.2, 7.3 and ICD10 CCS CIR001-CIR006, CIR008-CIR016, CIR018-CIR019 (excludes CIR007 = essential hypertension and CIR017 = cardiac dysrhythmias).

**Supplementary Table S2:** Classification of strongly anticholinergic medication use based on the 2019 Beers criteria Table 7

| <b>Medication class</b>                | <b>Individual medications</b>                                                                                                                                                                                                                                                                                                                         |
|----------------------------------------|-------------------------------------------------------------------------------------------------------------------------------------------------------------------------------------------------------------------------------------------------------------------------------------------------------------------------------------------------------|
| Antiarrhythmics                        | disopyramide                                                                                                                                                                                                                                                                                                                                          |
| Antidepressants                        | amitriptyline, amoxapine, clomipramine, desipramine, doxepin, imipramine, nortriptyline, paroxetine, protriptyline, and trimipramine                                                                                                                                                                                                                  |
| Antiemetics                            | prochlorperazine, promethazine                                                                                                                                                                                                                                                                                                                        |
| Antihistamines (first generation)      | brompheniramine, carbinoxamine, chlorpheniramine, clemastine, cyproheptadine, dexbrompheniramine, dexchlorpheniramine, dimenhydrinate, diphenhydramine (oral), doxylamine, hydroxyzine, meclizine, clidinium-chlordiazepoxide, dicyclomine, homatropine (excludes ophthalmic), methscopolamine, propantheline, promethazine, pyrilamine, triprolidine |
| Antimuscarinics (urinary incontinence) | darifenacin, fesoterodine, flavoxate, oxybutynin, solifenacin, tolterodine, and trospium                                                                                                                                                                                                                                                              |
| Antiparkinsonian agents                | benztropine, trihexyphenidyl                                                                                                                                                                                                                                                                                                                          |
| Antipsychotics                         | chlorpromazine, clozapine, loxapine, olanzapine, perphenazine, thioridazine, trifluoperazine                                                                                                                                                                                                                                                          |
| Antispasmodics                         | atropine, belladonna alkaloids, scopolamine (excluded ophthalmic)                                                                                                                                                                                                                                                                                     |
| Skeletal muscle relaxants              | cyclobenzaprine, orphenadrine                                                                                                                                                                                                                                                                                                                         |

**Supplementary Table S3:** Classification of sedative-hypnotic medications based on previous studies and the Sedative Load Model

| <b>Medication class</b>              | <b>Individual medications</b>                                                                                                                                                                      |
|--------------------------------------|----------------------------------------------------------------------------------------------------------------------------------------------------------------------------------------------------|
| Benzodiazepines                      | Alprazolam, chlordiazepoxide, clorazepate, diazepam, halazepam, lorazepam, oxazepam, prazepam, clobazam, clonazepam, midazolam, estazolam, flurazepam, quazepam, remimazolam, remazepam, triazolam |
| Nonbenzodiazepine sedative hypnotics | Zolpidem, zaleplon, eszopiclone                                                                                                                                                                    |
| Selected antiepileptic drugs         | Phenobarbital, gabapentin, pregabalin                                                                                                                                                              |
| Selected antipsychotics              | All first generation antipsychotics, quetiapine, olanzapine, and clozapine                                                                                                                         |
| Selected antihistamines              | Promethazine and diphenhydramine                                                                                                                                                                   |
| Additional antidepressant            | doxepin                                                                                                                                                                                            |

**Supplementary Table S4:** List of criteria that were either different between individuals with and without dementia or only applied to individuals with dementia

|                                                                           |                                                                                                                                                                                                                                                                                                                             |
|---------------------------------------------------------------------------|-----------------------------------------------------------------------------------------------------------------------------------------------------------------------------------------------------------------------------------------------------------------------------------------------------------------------------|
| Criteria that are different between individuals with and without dementia |                                                                                                                                                                                                                                                                                                                             |
| STOPP-V2 D1                                                               | Stop tricyclic antidepressants (TCAs) with dementia, narrow angle glaucoma, cardiac conduction abnormalities, prostatism, or prior history of urinary retention (risk of worsening these conditions).                                                                                                                       |
| STOPP-V2 I1                                                               | Stop antimuscarinic drugs with dementia, or chronic cognitive impairment (risk of increased confusion, agitation) or narrow-angle glaucoma (risk of acute exacerbation of glaucoma), or chronic prostatism (risk of urinary retention).                                                                                     |
| Criteria that only apply to individuals with dementia                     |                                                                                                                                                                                                                                                                                                                             |
| STOPP-V2 D8                                                               | Stop anticholinergics/antimuscarinics in patients with delirium or dementia (risk of exacerbation of cognitive impairment).                                                                                                                                                                                                 |
| STOPP-V2 D9                                                               | Stop neuroleptic antipsychotic in patients with behavioral and psychological symptoms of dementia (BPSD) unless symptoms are severe and other non-pharmacological treatments have failed (increased risk of stroke).                                                                                                        |
| STOPP-V2 D11                                                              | Stop acetylcholinesterase inhibitors with a known history of persistent bradycardia (< 60 beats/min.), heart block or recurrent unexplained syncope or concurrent treatment with drugs that reduce heart rate such as beta-blockers, digoxin, diltiazem, verapamil (risk of cardiac conduction failure, syncope and injury) |
| STOPPFrail memantine                                                      | Memantine: Discontinue and monitor in patients with moderate to severe dementia, unless memantine has clearly improved BPSD.                                                                                                                                                                                                |
| 2019 Beers cholinesterase inhibitors in syncope                           | Acetylcholinesterase inhibitors cause bradycardia and should be avoided in older adults whose syncope may be due to bradycardia                                                                                                                                                                                             |

Abbreviations: STOPP-V2, Screening Tool of Older Persons' Prescriptions Version 2; STOPPFrail, Screening Tool of Older Persons' Prescriptions in Frail adults with a limited life expectancy



**Supplementary Table S5:** Number of individuals with a dementia classification in the Health and Retirement Study by interview wave year and overall

| <b>Year of interview</b> | <b>Total number of individuals interviewed at specific wave</b> | <b>Number with classification of dementia in the specific wave</b> | <b>Percentage of individuals with classification of dementia in specific wave</b> |
|--------------------------|-----------------------------------------------------------------|--------------------------------------------------------------------|-----------------------------------------------------------------------------------|
| 2008                     | 5,078                                                           | 364                                                                | 7.2%                                                                              |
| 2010                     | 5,145                                                           | 358                                                                | 7.0%                                                                              |
| 2012                     | 5,250                                                           | 382                                                                | 7.3%                                                                              |
| 2014                     | 5,752                                                           | 418                                                                | 7.3%                                                                              |
| 2016                     | 5,784                                                           | 445                                                                | 7.7%                                                                              |
| 2018                     | 4,912                                                           | 354                                                                | 7.2%                                                                              |
| Overall                  | 9,844                                                           | 1,475                                                              | 15.0%                                                                             |

**Supplementary Table S6:** Frequency and mean number of potentially problematic medications among community-dwelling older adults with and without dementia overall and across the different domains in the primary cohort matched on age, sex, comorbidity count, and year of assessment

| Medication domain                                       | Outcome measures                   | Persons with dementia (N = 1,441) | Persons without dementia (N = 1,441) | OR or IRR (95% CI)                  |
|---------------------------------------------------------|------------------------------------|-----------------------------------|--------------------------------------|-------------------------------------|
| Overall                                                 | % with $\geq 1$ flagged med        | 73%                               | 67%                                  | OR=1.34 (1.12, 1.62) (p=0.002)      |
|                                                         | Mean number of flagged medications | 2.09                              | 1.62                                 | IRR=1.29 (1.17, 1.42) (p<0.001)     |
| <b>Medication overuse</b>                               |                                    |                                   |                                      |                                     |
| Over-aggressive treatment of chronic conditions         | % with $\geq 1$ flagged med        | 17%                               | 14%                                  | OR=1.25 (0.98, 1.60) (p=0.07)       |
|                                                         | Mean number of flagged medications | 0.18                              | 0.15                                 | IRR=1.21 (0.98, 1.50) (p=0.08)      |
| Medications inappropriate near end of life (STOPPFrail) | % with $\geq 1$ flagged med        | 4%                                | 2%                                   | OR = 1.78 (1.10, 2.86) (p = 0.02)   |
|                                                         | Mean number of flagged medications | 0.06                              | 0.04                                 | IRR = 1.59 (0.96, 2.63) (p = 0.07)  |
| <b>Medication misuse</b>                                |                                    |                                   |                                      |                                     |
| Medications that negatively affect cognition            | % with $\geq 1$ flagged med        | 41%                               | 30%                                  | OR = 1.59 (1.33, 1.89) (p < 0.001)  |
|                                                         | Mean number of flagged medications | 0.61                              | 0.42                                 | IRR = 1.45 (1.26, 1.67) (p < 0.001) |
| 2019 Beers criteria                                     | % with $\geq 1$ flagged med        | 60%                               | 51%                                  | OR = 1.45 (1.23, 1.72) (p < 0.001)  |
|                                                         | Mean number of flagged medications | 1.53                              | 1.06                                 | IRR = 1.44 (1.28, 1.63) (p < 0.001) |
| STOPP Version 2 criteria                                | % with $\geq 1$ flagged med        | 66%                               | 53%                                  | OR = 1.69 (1.42, 2.00) (p < 0.001)  |
|                                                         | Mean number of flagged medications | 1.32                              | 0.96                                 | IRR = 1.37 (1.24, 1.51) (p < 0.001) |

Abbreviations: CI, confidence interval; IRR, incidence rate ratio; OR, odds ratio; STOPP, Screening Tool of Older Persons' Prescriptions; STOPPFrail, Screening Tool of Older Persons' Prescriptions in Frail adults with a limited life expectancy

**Supplementary Table S7:** Number and survey weighted percentage of persons with diabetes and hypertension who met criteria for over-aggressive treatment of these conditions in the primary cohort matched on age, sex, comorbidity count, and year of assessment

|                                                                                                                                                    | Persons with dementia<br>(n=1,441)  | Persons without dementia<br>(n=1,441) |
|----------------------------------------------------------------------------------------------------------------------------------------------------|-------------------------------------|---------------------------------------|
|                                                                                                                                                    | Number (survey weighted percentage) |                                       |
| Individuals with diabetes <sup>a</sup>                                                                                                             | 504 (32.6%)                         | 444 (30.2%)                           |
| Individuals with diabetes with hemoglobin A1c <7.5% and on insulin/sulfonylurea <sup>b</sup>                                                       | 203 (39.9%)                         | 179 (39.0%)                           |
| Individuals with hypertension <sup>c</sup>                                                                                                         | 1,178 (79.1%)                       | 1,194 (81.6%)                         |
| Individuals with hypertension with an average systolic blood pressure <110 and on qualifying potentially problematic antihypertensive <sup>d</sup> | 72 (5.8%)                           | 47 (3.8%)                             |

a We identified individuals with diabetes through either International Classification of Diseases (ICD)-9 or ICD-10 diagnoses codes for Type 2 diabetes (250.00, 250.02, 250.10, 250.12, 250.20, 250.22, 250.30, 250.32, 250.40, 250.42, 250.50, 250.52, 250.60, 250.62, 250.70, 250.72, 250.80, 250.82, 250.90, 250.92, E11\*) or prescription for any antidiabetic drug in the year prior to the interview date.

b Among individuals with diabetes, we identified individuals with a hemoglobin A1c<7.5% who were also receiving insulin/sulfonylurea. The numbers presented were averaged over the 10 imputed datasets. The number and percentage reported here answers the question “among individuals with diabetes, how many were receiving over-aggressive treatment for their diabetes?” The denominator for this calculation is the number of individuals with diabetes which is different than what is presented in Table 3 and Figure 1 where the denominator is the whole cohort (n=1,441).

c We identified individuals with hypertension through either self-report during the enhanced face to face interview or prescription for antihypertensives in the year prior to the interview date. While certain antihypertensives can be used for multiple indications (e.g., metoprolol for atrial fibrillation rather than hypertension), our numbers align with other national survey data in an older population where the prevalence of hypertension is in the range of 80%.

d Among individuals with hypertension, we identified individuals with an average systolic blood pressure <110 who were also receiving potentially problematic antihypertensives. This was operationalized in the same way as done in Table 3 and Figure 1 (see supplementary methods; for example, an individual who was on metoprolol with SBP <110 and diagnosis code for atrial fibrillation would not be included here). The numbers presented were averaged over the 10 imputed datasets. The number and percentage reported here answers the question “among individuals with hypertension, how many were receiving over-aggressive treatment for their hypertension?” The denominator for this calculation is different than what is presented in Table 3 and Figure 1 where the denominator is the whole cohort (n=1,441).

**Supplementary Table S8:** Baseline characteristics of community-dwelling older adults with and without dementia enrolled in the Health and Retirement Study from 2008-2018 in the cohort matched only on year of assessment

|                                                      | <b>Individuals with dementia<br/>(n = 1, 475)</b> | <b>Individuals without dementia<br/>(n = 12,492)<sup>a</sup></b> |            |
|------------------------------------------------------|---------------------------------------------------|------------------------------------------------------------------|------------|
| <b>Characteristic</b>                                | <b>Number (weighted %)</b>                        | <b>Number (weighted %)</b>                                       | <b>SMD</b> |
| Age in years, median (IQR)                           | 83.9 (78.3-89.3)                                  | 73.6 (69.3-79.4)                                                 | 0.02       |
| Female sex                                           | 976 (66.9%)                                       | 7815 (60.5%)                                                     | -0.13      |
| Race/Ethnicity                                       |                                                   |                                                                  | 0.32       |
| Non-Hispanic White                                   | 892 (69.0%)                                       | 9322 (82.1%)                                                     |            |
| Non-Hispanic Black                                   | 303 (14.7%)                                       | 1624 (7.6%)                                                      |            |
| Hispanic                                             | 250 (14.1%)                                       | 1300 (8.0%)                                                      |            |
| Other                                                | 30 (2.2%)                                         | 246 (2.3%)                                                       |            |
| Marital status (%)                                   |                                                   |                                                                  | -0.42      |
| Married or partnered                                 | 7081 (57.4%)                                      | 556 (36.7%)                                                      |            |
| Single or widowed                                    | 5411 (42.6%)                                      | 919 (63.3%)                                                      |            |
| Lives alone (%)                                      | 3824 (32.3%)                                      | 464 (34.9%)                                                      | 0.05       |
| Comorbidities                                        |                                                   |                                                                  |            |
| Cancer                                               | 350 (23.3%)                                       | 2583 (21.1%)                                                     | 0.05       |
| Diabetes                                             | 492 (30.7%)                                       | 3500 (27.6%)                                                     | 0.07       |
| Heart disease                                        | 659 (44.5%)                                       | 4257 (34.1%)                                                     | 0.21       |
| Hypertension                                         | 1130 (74.7%)                                      | 8910 (69.1%)                                                     | 0.13       |
| Lung disease                                         | 221 (16.6%)                                       | 1601 (12.8%)                                                     | 0.11       |
| Stroke                                               | 402 (26.6%)                                       | 1380 (10.6%)                                                     | 0.42       |
| Median (IQR) number of IADL dependencies (range 0-5) | 1.8 (0-3.7)                                       | 0 (0-0)                                                          | 0.02       |
| Median (IQR) number of ADL dependencies (range 0-6)  | 0.8 (0-3.2)                                       | 0 (0-0)                                                          | 0.02       |
| Number of medications (median, IQR)                  | 8.0 (4.6-12.3)                                    | 7.6 (4.4-12.0)                                                   | 0.0007     |
| Polypharmacy ( $\geq 5$ medications)                 | 1010 (77.8%)                                      | 1192 (80.1%)                                                     | 0.06       |

Abbreviations: ADL, activities of daily living; IADL, instrumental activities of daily living; IQR, interquartile range; SMD, standardized mean difference

a A single individual without dementia could be counted multiple times if they participated in multiple interviews during their enrollment in the Health and Retirement Study.

**Supplementary Table S9:** Baseline characteristics of community-dwelling older adults with and without dementia enrolled in the Health and Retirement Study from 2008-2018 in the fully matched cohort<sup>a</sup>

|                                                      | <b>Individuals with dementia<br/>(n = 971)</b> | <b>Individuals without dementia<br/>(n = 971)</b> |            |
|------------------------------------------------------|------------------------------------------------|---------------------------------------------------|------------|
| <b>Characteristic</b>                                | <b>Number (weighted %)</b>                     | <b>Number (weighted %)</b>                        | <b>SMD</b> |
| Age in years, median (IQR)                           | 82.3 (75.9-87.8)                               | 82.2 (76.3-87.3)                                  | -0.0005    |
| Female sex                                           | 639 (65.2%)                                    | 639 (65.7%)                                       | 0.01       |
| Race/Ethnicity                                       |                                                |                                                   | 0.09       |
| Non-Hispanic White                                   | 604 (70.0%)                                    | 617 (72.5%)                                       |            |
| Non-Hispanic Black                                   | 186 (13.8%)                                    | 169 (11.3%)                                       |            |
| Hispanic                                             | 159 (13.9%)                                    | 165-170 (~14.0%) <sup>b</sup>                     |            |
| Other                                                | 22 (2.4%)                                      | <25 (<3%) <sup>b</sup>                            |            |
| Marital status (%)                                   |                                                |                                                   | -0.008     |
| Married or partnered                                 | 404 (41.0%)                                    | 427 (41.4%)                                       |            |
| Single or widowed                                    | 567 (59.0%)                                    | 544 (58.6%)                                       |            |
| Lives alone (%)                                      | 320 (35.3%)                                    | 324 (38.0%)                                       | -0.05      |
| Comorbidities                                        |                                                |                                                   |            |
| Cancer                                               | 233 (23.3%)                                    | 203 (21.5%)                                       | 0.04       |
| Diabetes                                             | 331 (31.2%)                                    | 281 (26.9%)                                       | 0.10       |
| Heart disease                                        | 411 (42.1%)                                    | 425 (43.4%)                                       | -0.03      |
| Hypertension                                         | 736 (72.9%)                                    | 728 (73.0%)                                       | -0.001     |
| Lung disease                                         | 141 (16.3%)                                    | 154 (16.0%)                                       | 0.008      |
| Stroke                                               | 236 (24.0%)                                    | 177 (18.0%)                                       | 0.15       |
| Median (IQR) number of IADL dependencies (range 0-5) | 0.6 (0-2.0)                                    | 0.6 (0-1.8)                                       | 0.0003     |
| Median (IQR) number of ADL dependencies (range 0-6)  | 0 (0-1.8)                                      | 0.05 (0-1.8)                                      | 0.001      |
| Number of medications (median, IQR)                  | 6.4 (3.9-9.9)                                  | 6.8 (4.1-10.6)                                    | -0.002     |
| Polypharmacy (≥5 medications)                        | 731 (74.0%)                                    | 755 (75.6%)                                       | -0.04      |

Abbreviations: ADL, activities of daily living; IADL, instrumental activities of daily living; IQR, interquartile range; SMD, standardized mean difference

<sup>a</sup> In the fully matched cohort, we 1:1 matched individuals with and without dementia by year of assessment, age, sex, comorbidity count, race/ethnicity, education, marital status, lives alone, Medicaid eligibility, body mass index, smoking status, region of country, hospitalization or emergency department visit in the past year, outpatient visits in the past year, activities of daily living (ADL) difficulty score, and instrumental ADL (IADL) difficulty score.

<sup>b</sup> Results are presented in this manner due to the Centers for Medicare and Medicaid Services (CMS) cell suppression size policy which sets the minimum threshold for the display of CMS data. This was necessary as the “Other” category involved <25 individuals.

**Supplementary Table S10:** Frequency and mean number of potentially problematic medications among community-dwelling older adults with and without dementia overall and across the different domains in the cohort matched only on year of assessment

| Medication domain                               | Outcome measures            | Persons with dementia (N = 1,475) | Persons without dementia (N = 12,492) <sup>a</sup> | OR or IRR (95% CI)                  |
|-------------------------------------------------|-----------------------------|-----------------------------------|----------------------------------------------------|-------------------------------------|
| Overall                                         | % with $\geq 1$ flagged med | 73%                               | 67%                                                | OR=1.31 (1.14, 1.51) (p<0.001)      |
|                                                 | Mean                        | 2.08                              | 1.66                                               | IRR=1.25 (1.18, 1.35) (p<0.001)     |
| <b>Medication overuse</b>                       |                             |                                   |                                                    |                                     |
| Over-aggressive treatment of chronic conditions | % with $\geq 1$ flagged med | 17%                               | 14%                                                | OR=1.28 (1.06, 1.55) (p=0.010)      |
|                                                 | Mean                        | 0.18                              | 0.15                                               | IRR=1.22 (1.04, 1.44) (p=0.017)     |
| Medications inappropriate near end of life      | % with $\geq 1$ flagged med | 4%                                | 2%                                                 | OR=2.89 (2.09, 4.00) (p<0.001)      |
|                                                 | Mean                        | 0.07                              | 0.02                                               | IRR=2.68 (1.91, 3.76) (p<0.001)     |
| <b>Medication misuse</b>                        |                             |                                   |                                                    |                                     |
| Medications that negatively affect cognition    | % with $\geq 1$ flagged med | 40%                               | 31%                                                | OR = 1.53 (1.35, 1.74) (p<0.001)    |
|                                                 | Mean                        | 0.61                              | 0.43                                               | IRR = 1.41 (1.27, 1.56) (p<0.001)   |
| 2019 Beers criteria                             | % with $\geq 1$ flagged med | 60%                               | 56%                                                | OR = 1.18 (1.04, 1.34) (p = 0.01)   |
|                                                 | Mean                        | 1.54                              | 1.26                                               | IRR = 1.26 (1.15, 1.38) (p<0.001)   |
| STOPP Version 2 criteria                        | % with $\geq 1$ flagged med | 66%                               | 50%                                                | OR = 1.89 (1.66, 2.16) (p < 0.001)  |
|                                                 | Mean                        | 1.31                              | 0.88                                               | IRR = 1.49 (1.39, 1.60) (p < 0.001) |

Abbreviations: CI, confidence interval; IRR, incidence rate ratio; OR, odds ratio; STOPP, Screening Tool of Older Persons Prescriptions

a A single individual without dementia could be counted multiple times if they were included in multiple interviews during their enrollment in the Health and Retirement Study.

**Supplementary Table S11:** Frequency and mean number of potentially problematic medications among community-dwelling older adults with and without dementia overall and across the different domains in the fully matched cohort<sup>a</sup>

| Medication domain                               | Outcome measures            | Persons with dementia (N = 971) | Persons without dementia (N = 971) | OR or IRR (95% CI)                       |
|-------------------------------------------------|-----------------------------|---------------------------------|------------------------------------|------------------------------------------|
| Overall                                         | % with $\geq 1$ flagged med | 73%                             | 71%                                | OR=1.11<br>(0.88, 1.40)<br>(p=0.37)      |
|                                                 | Mean                        | 2.09                            | 2.04                               | IRR=1.02<br>(0.91, 1.15)<br>(p=0.72)     |
| Medication overuse                              |                             |                                 |                                    |                                          |
| Over-aggressive treatment of chronic conditions | % with $\geq 1$ flagged med | 18%                             | 17%                                | OR=1.33<br>(0.98, 1.80)<br>(p=0.07)      |
|                                                 | Mean                        | 0.18                            | 0.14                               | IRR=1.282<br>(0.994, 1.654)<br>(p=0.06)  |
| Medications inappropriate near end of life      | % with $\geq 1$ flagged med | 4%                              | 3%                                 | OR = 1.17<br>(0.69, 1.98)<br>(p =0.57)   |
|                                                 | Mean                        | 0.06                            | 0.05                               | IRR = 1.16<br>(0.69, 1.95)<br>(p =0.58)  |
| Medication misuse                               |                             |                                 |                                    |                                          |
| Medications that negatively affect cognition    | % with $\geq 1$ flagged med | 39%                             | 32%                                | OR = 1.36<br>(1.10, 1.68)<br>(p =0.005)  |
|                                                 | Mean                        | 0.59                            | 0.46                               | IRR = 1.28<br>(1.07, 1.52)<br>(p =0.006) |
| 2019 Beers criteria                             | % with $\geq 1$ flagged med | 59%                             | 60%                                | OR = 1.01<br>(0.81, 1.24)<br>(p =0.96)   |
|                                                 | Mean                        | 1.51                            | 1.47                               | IRR = 1.04<br>(0.90, 1.21)<br>(p = 0.61) |
| STOPP Version 2 criteria                        | % with $\geq 1$ flagged med | 65%                             | 59%                                | OR = 1.31<br>(1.06, 1.62)<br>(p =0.001)  |
|                                                 | Mean                        | 1.33                            | 1.18                               | IRR = 1.14<br>(1.01, 1.28)<br>(p =0.004) |



Abbreviations: CI, confidence interval; IRR, incidence rate ratio; OR, odds ratio; STOPP, Screening Tool of Older Persons Prescriptions

a In the fully matched cohort, we 1:1 matched individuals with and without dementia by year of assessment, age, sex, comorbidity count, race/ethnicity, education, marital status, lives alone, Medicaid eligibility, body mass index, smoking status, region of country, hospitalization or emergency department visit in the past year, outpatient visits in the past year, activities of daily living (ADL) difficulty score, and instrumental ADL (IADL) difficulty score.

**Supplementary Table S12:** Frequency and mean number of potentially problematic medications among community-dwelling older adults with and without dementia overall and across the different domains using propensity score matching and inverse probability of treatment weighting

|                                                 |                             | Primary cohort matched on year of assessment, age, sex, and comorbidity count |                                      |                                    | IPTW cohort                       |                                                    |                                 |
|-------------------------------------------------|-----------------------------|-------------------------------------------------------------------------------|--------------------------------------|------------------------------------|-----------------------------------|----------------------------------------------------|---------------------------------|
| Medication domain                               | Outcome measures            | Persons with dementia (N = 1,441)                                             | Persons without dementia (N = 1,441) | OR or IRR (95% CI)                 | Persons with dementia (N = 1,475) | Persons without dementia (N = 12,492) <sup>a</sup> | OR or IRR (95% CI)              |
| Overall                                         | % with $\geq 1$ flagged med | 73%                                                                           | 67%                                  | OR=1.34 (1.12, 1.62) (p=0.002)     | 73%                               | 67%                                                | OR=1.33 (1.14, 1.55) (p<0.001)  |
|                                                 | Mean                        | 2.09                                                                          | 1.62                                 | IRR=1.29 (1.17, 1.42) (p<0.001)    | 2.08                              | 1.66                                               | IRR=1.29 (1.20, 1.40) (p<0.001) |
| Medication overuse                              |                             |                                                                               |                                      |                                    |                                   |                                                    |                                 |
| Over-aggressive treatment of chronic conditions | % with $\geq 1$ flagged med | 17%                                                                           | 14%                                  | OR=1.25 (0.98, 1.60) (p=0.07)      | 18%                               | 17%                                                | OR=1.28 (1.05, 1.56) (p=0.013)  |
|                                                 | Mean                        | 0.18                                                                          | 0.15                                 | IRR=1.21 (0.98, 1.50) (p=0.08)     | 0.18                              | 0.15                                               | IRR=1.23 (1.04, 1.46) (p=0.012) |
| Medications inappropriate near end of life      | % with $\geq 1$ flagged med | 4%                                                                            | 2%                                   | OR = 1.78 (1.10, 2.86) (p = 0.02)  | 7%                                | 4%                                                 | OR=1.88 (1.30, 2.73) (p=0.001)  |
|                                                 | Mean                        | 0.06                                                                          | 0.04                                 | IRR = 1.59 (0.96, 2.63) (p = 0.07) | 0.04                              | 0.02                                               | IRR=1.88 (1.30, 2.73) (p<0.001) |
| Medication misuse                               |                             |                                                                               |                                      |                                    |                                   |                                                    |                                 |
| Medications that negatively                     | % with $\geq 1$ flagged med | 41%                                                                           | 30%                                  | OR = 1.59 (1.33, 1.89) (p < 0.001) | 40%                               | 30%                                                | OR=1.60 (1.39-1.83) (p<0.001)   |

|                          |                             |      |      |                                           |      |      |                                       |
|--------------------------|-----------------------------|------|------|-------------------------------------------|------|------|---------------------------------------|
| affect cognition         | Mean                        | 0.61 | 0.42 | IRR = 1.45<br>(1.26, 1.67)<br>(p < 0.001) | 0.61 | 0.40 | IRR=1.51<br>(1.36, 1.68)<br>(p<0.001) |
| 2019 Beers criteria      | % with $\geq 1$ flagged med | 60%  | 51%  | OR = 1.45<br>(1.23, 1.72)<br>(p < 0.001)  | 60%  | 52%  | OR=1.40<br>(1.22, 1.61)<br>(p<0.001)  |
|                          | Mean                        | 1.53 | 1.06 | IRR = 1.44<br>(1.28, 1.63)<br>(p < 0.001) | 1.51 | 1.06 | IRR=1.43<br>(1.30, 1.58)<br>(p<0.001) |
| STOPP Version 2 criteria | % with $\geq 1$ flagged med | 66%  | 53%  | OR = 1.69<br>(1.42, 2.00)<br>(p < 0.001)  | 66%  | 52%  | OR=1.76<br>(1.53, 2.03)<br>(p<0.001)  |
|                          | Mean                        | 1.32 | 0.96 | IRR = 1.37<br>(1.24, 1.51)<br>(p < 0.001) | 1.31 | 0.92 | IRR=1.88<br>(1.30, 2.73)<br>(p=0.001) |

Abbreviations: CI, confidence interval; IPTW, inverse probability of treatment weighting; IRR, incidence rate ratio; OR, odds ratio; STOPP, Screening Tool of Older Persons' Prescriptions

a For the control pool (i.e., persons without dementia) in the inverse probability of treatment weighting analysis, the number of persons without dementia included was greater than the number of unique individuals without dementia because a person could contribute information from multiple waves in this analysis. For example, a person with an HRS interview in 2008, 2010, and 2012 who did not have a classification of dementia during any of these waves would be included 3 times in this analysis. We accounted for intra-individual correlation and repeated measures in calculating the odds ratio, incidence rate ratio, and p-value using a generalized estimating equation (GEE) model.

**Supplementary Table S13:** Frequency and mean number of potentially problematic medications among community-dwelling older adults with and without dementia overall and across the different domains in the primary matched cohort including and excluding criteria that are specific to individuals with dementia<sup>a</sup>

| Medication domain                                       | Outcome measures            | All criteria                      |                                      |                                          | Excluding criteria specific to persons with dementia |                                      |                                           |
|---------------------------------------------------------|-----------------------------|-----------------------------------|--------------------------------------|------------------------------------------|------------------------------------------------------|--------------------------------------|-------------------------------------------|
|                                                         |                             | Persons with dementia (N = 1,441) | Persons without dementia (N = 1,441) | OR or IRR (95% CI)                       | Persons with dementia (N = 1,441)                    | Persons without dementia (N = 1,441) | OR or IRR (95% CI)                        |
| Overall <sup>a</sup>                                    | % with $\geq 1$ flagged med | 77%                               | 67%                                  | OR=1.58<br>(1.31, 1.90)<br>(p<0.001)     | 73%                                                  | 67%                                  | OR=1.34<br>(1.12, 1.62)<br>(p=0.002)      |
|                                                         | Mean                        | 2.20                              | 1.63                                 | IRR=1.35<br>(1.22, 1.48)<br>(p<0.001)    | 2.09                                                 | 1.62                                 | IRR=1.29<br>(1.17, 1.42)<br>(p<0.001)     |
| Medication overuse                                      |                             |                                   |                                      |                                          |                                                      |                                      |                                           |
| Over-aggressive treatment of chronic conditions         | % with $\geq 1$ flagged med | 17%                               | 14%                                  | OR=1.25<br>(0.98, 1.60)<br>(p=0.07)      | 17%                                                  | 14%                                  | OR=1.25<br>(0.98, 1.60)<br>(p=0.07)       |
|                                                         | Mean                        | 0.18                              | 0.15                                 | IRR=1.21<br>(0.98, 1.50)<br>(p=0.08)     | 0.18                                                 | 0.15                                 | IRR=1.21<br>(0.98, 1.50)<br>(p=0.08)      |
| Medications inappropriate near end of life <sup>a</sup> | % with $\geq 1$ flagged med | 4%                                | 2%                                   | OR = 1.78<br>(1.10, 2.86)<br>(p = 0.02)  | 4%                                                   | 2%                                   | OR = 1.73<br>(1.07, 2.78)<br>(p = 0.025)  |
|                                                         | Mean                        | 0.06                              | 0.04                                 | IRR = 1.59<br>(0.96, 2.63)<br>(p = 0.07) | 0.06                                                 | 0.04                                 | IRR = 1.52<br>(0.92, 2.51)<br>(p = 0.105) |
| Medication misuse                                       |                             |                                   |                                      |                                          |                                                      |                                      |                                           |
| Medications that negatively affect cognition            | % with $\geq 1$ flagged med | 41%                               | 30%                                  | OR = 1.59<br>(1.33, 1.89)<br>(p < 0.001) | 41%                                                  | 30%                                  | OR=1.59<br>(p<0.001)                      |
|                                                         | Mean                        | 0.61                              | 0.42                                 | IRR = 1.45<br>(1.26, 1.67)               | 0.61                                                 | 0.42                                 | IRR=1.45<br>(p<0.001)                     |

|                                       |                       |      |      |                                           |      |      |                                           |
|---------------------------------------|-----------------------|------|------|-------------------------------------------|------|------|-------------------------------------------|
|                                       |                       |      |      | (p < 0.001)                               |      |      |                                           |
| 2019 Beers criteria <sup>b</sup>      | % with ≥1 flagged med | 60%  | 51%  | OR = 1.45<br>(1.23, 1.72)<br>(p < 0.001)  | 58%  | 51%  | OR = 1.37<br>(1.16, 1.62)<br>(p < 0.001)  |
|                                       | Mean                  | 1.53 | 1.06 | IRR = 1.44<br>(1.28, 1.63)<br>(p < 0.001) | 1.48 | 1.06 | IRR = 1.40<br>(1.23, 1.58)<br>(p < 0.001) |
| STOPP Version 2 criteria <sup>b</sup> | % with ≥1 flagged med | 66%  | 53%  | OR = 1.69<br>(1.42, 2.00)<br>(p < 0.001)  | 53%  | 52%  | OR = 1.02<br>(0.86, 1.20)<br>(p = 0.82)   |
|                                       | Mean                  | 1.32 | 0.96 | IRR = 1.37<br>(1.24, 1.51)<br>(p < 0.001) | 0.98 | 0.94 | IRR = 1.04<br>(0.94, 1.15)<br>(p = 0.49)  |

Abbreviations: CI, confidence interval; IRR, incidence rate ratio; OR, odds ratio; STOPP, Screening Tool of Older Persons' Prescriptions

a There were some criteria in the subdomains of “Medications inappropriate near end of life,” “2019 Beers criteria,” and “STOPP Version 2 criteria” which were specific to individuals with dementia or differed between those with and without dementia (see supplementary methods and Supplementary Table S4 for additional details). The boxes shaded in yellow represent the sensitivity analysis which excluded criteria that were specific to individuals with dementia. The boxes shaded in green represent the primary analysis in Table 3 and Figure 1. For the overall results in the primary analysis (results displayed in Table 3 and Figure 1, green shaded boxes in this supplementary table), we excluded the criteria specific to individuals with dementia in order to make a fairer comparison between those with and without dementia when calculating the overall measure. In a sensitivity analysis, we included all criteria in calculating the overall results (yellow shaded boxes in this supplementary table). In the primary analysis for the individual sub-domains (results displayed in Table 3 and Figure 1, green shaded boxes in this supplementary table), we did not exclude these criteria. In a sensitivity analysis, we excluded these criteria in calculating the results for these sub-domains (yellow shaded boxes in this supplementary table). Since a single medication could be identified as potentially problematic in multiple different ways, the overall results of this sensitivity analysis are similar to the primary analysis.

**Supplementary Table S14:** Frequency and mean number of potentially problematic medications among community-dwelling older adults with and without dementia overall and in the medication overuse domain in the primary matched cohort and a separate matched cohort in which the non-dementia controls were not preferentially selected based on presence of enhanced face to face interview

|                                                 |                             | EFTF matched cohort (primary analysis from Table 3 and Figure 1) |                                      |                                       | Matched cohort where persons without dementia were not specifically selected based on the presence of EFTF interview (sensitivity analysis) |                                     |                                      |
|-------------------------------------------------|-----------------------------|------------------------------------------------------------------|--------------------------------------|---------------------------------------|---------------------------------------------------------------------------------------------------------------------------------------------|-------------------------------------|--------------------------------------|
| Medication domain                               | Outcome measures            | Persons with dementia (N = 1,441)                                | Persons without dementia (N = 1,441) | OR or IRR (95% CI)                    | Persons with dementia (N =1,470)                                                                                                            | Persons without dementia (N =1,470) | OR or IRR (95% CI)                   |
| Overall                                         | % with $\geq 1$ flagged med | 73%                                                              | 67%                                  | OR=1.34<br>(1.12, 1.62)<br>(p=0.002)  | 73%                                                                                                                                         | 69%                                 | OR=1.21<br>(1.00, 1.46)<br>(p=0.049) |
|                                                 | Mean                        | 2.09                                                             | 1.62                                 | IRR=1.29<br>(1.17, 1.42)<br>(p<0.001) | 2.08                                                                                                                                        | 1.73                                | IRR=1.20<br>(1.09-1.33)<br>(p<0.001) |
| Medication overuse                              |                             |                                                                  |                                      |                                       |                                                                                                                                             |                                     |                                      |
| Over-aggressive treatment of chronic conditions | % with $\geq 1$ flagged med | 17%                                                              | 14%                                  | OR=1.25<br>(0.98, 1.60)<br>(p=0.07)   | 17%                                                                                                                                         | 16%                                 | OR=1.11<br>(0.85-1.45)<br>(p=0.43)   |
|                                                 | Mean                        | 0.18                                                             | 0.15                                 | IRR=1.21<br>(0.98, 1.50)<br>(p=0.08)  | 0.18                                                                                                                                        | 0.16                                | IRR=1.09<br>(0.86-1.38)<br>(p=0.48)  |

Abbreviations: CI, confidence interval; EFTF, enhanced face to face; IRR, incidence rate ratio; OR, odds ratio

**Supplementary Table S15:** Results from the index of local sensitivity to nonignorability (ISNI) method for the linear regression models for systolic blood pressure and hemoglobin A1c

| Variable                    | Systolic blood pressure model |            |         |        |       | Hemoglobin A1c model |            |         |       |       |
|-----------------------------|-------------------------------|------------|---------|--------|-------|----------------------|------------|---------|-------|-------|
|                             | MAR est.                      | Std. error | P-value | ISNI   | MinNI | MAR est.             | Std. error | P-value | ISNI  | MinNI |
| <b>(Intercept)</b>          | 95.27                         | 8.87       | < 2e-16 | 222.74 | 0.78  | 7.53                 | 0.43       | < 2e-16 | 0.38  | 1.03  |
| <b>Age</b>                  | 0.28                          | 0.03       | < 2e-16 | 0.23   | 2.33  | 0.00                 | 0.00       | 0.51    | 0.00  | 1.68  |
| <b>Male sex</b>             | 1.41                          | 0.38       | 0.00    | -0.93  | 8.06  | 0.04                 | 0.02       | 0.01    | 0.00  | 4.50  |
| <b>Race</b>                 |                               |            |         |        |       |                      |            |         |       |       |
| <b>Other</b>                | .                             |            |         |        |       |                      |            |         |       |       |
| <b>Non-Hispanic White</b>   | 13.32                         | 8.62       | 0.12    | -23.90 | 7.10  | -1.84                | 0.42       | 0.00    | -0.07 | 5.19  |
| <b>Non-Hispanic Black</b>   | 15.24                         | 8.63       | 0.08    | -24.70 | 6.88  | -1.56                | 0.42       | 0.00    | -0.06 | 6.30  |
| <b>Hispanic</b>             | 13.74                         | 8.65       | 0.11    | -29.72 | 5.73  | -1.70                | 0.42       | 0.00    | -0.06 | 5.96  |
| <b>ADL</b>                  | -0.26                         | 0.21       | 0.21    | 5.56   | 0.73  | -0.01                | 0.01       | 0.27    | 0.00  | 2.63  |
| <b>IADL</b>                 | -0.18                         | 0.27       | 0.52    | 8.19   | 0.66  | 0.01                 | 0.01       | 0.27    | 0.01  | 1.40  |
| <b>Lives alone</b>          | -0.03                         | 0.53       | 0.95    | 1.83   | 5.75  | 0.05                 | 0.02       | 0.04    | 0.00  | 5.24  |
| <b>Current smoker</b>       | 1.65                          | 0.65       | 0.01    | -3.27  | 3.89  | 0.01                 | 0.03       | 0.77    | -0.01 | 3.13  |
| <b>Married or partnered</b> | 0.84                          | 0.53       | 0.11    | 3.03   | 3.43  | -0.01                | 0.02       | 0.57    | 0.01  | 3.67  |
| <b>Education</b>            |                               |            |         |        |       |                      |            |         |       |       |
| <b>&lt; high school</b>     | .                             |            |         |        |       |                      |            |         |       |       |
| <b>High School or GED</b>   | -1.26                         | 0.47       | 0.01    | -8.38  | 1.10  | -0.04                | 0.02       | 0.07    | 0.00  | 3.60  |
| <b>College and above</b>    | -2.86                         | 0.47       | 0.00    | -11.62 | 0.80  | -0.08                | 0.02       | 0.00    | 0.01  | 1.35  |
| <b>Hospitalization</b>      |                               |            |         |        |       |                      |            |         |       |       |
| <b>0</b>                    | .                             |            |         |        |       |                      |            |         |       |       |
| <b>1</b>                    | -1.43                         | 0.71       | 0.04    | -1.02  | 13.73 | -0.05                | 0.03       | 0.08    | -0.01 | 3.99  |
| <b>&gt;1</b>                | -2.32                         | 1.18       | 0.05    | 15.97  | 1.45  | -0.12                | 0.05       | 0.01    | 0.01  | 5.31  |
| <b>ER Visit</b>             |                               |            |         |        |       |                      |            |         |       |       |
| <b>0</b>                    | .                             |            |         |        |       |                      |            |         |       |       |
| <b>1</b>                    | 0.35                          | 0.82       | 0.67    | 2.27   | 7.12  | 0.01                 | 0.04       | 0.80    | 0.01  | 2.59  |

|                           |       |      |         |       |        |       |      |         |       |        |
|---------------------------|-------|------|---------|-------|--------|-------|------|---------|-------|--------|
| >1                        | 0.03  | 1.41 | 0.98    | -5.68 | 4.90   | 0.14  | 0.06 | 0.02    | 0.00  | 548.42 |
| <b>Outpatient visit</b>   |       |      |         |       |        |       |      |         |       |        |
| 0                         | .     |      |         |       |        |       |      |         |       |        |
| 1                         | 1.23  | 0.93 | 0.19    | 12.75 | 1.44   | -0.04 | 0.04 | 0.28    | 0.00  | 30.46  |
| >1                        | 0.54  | 0.36 | 0.13    | 0.65  | 10.82  | 0.01  | 0.02 | 0.65    | -0.01 | 1.24   |
| <b>Region</b>             |       |      |         |       |        |       |      |         |       |        |
| <b>Northeast or Other</b> | .     |      |         |       |        |       |      |         |       |        |
| <b>Midwest</b>            | -0.68 | 0.57 | 0.23    | -3.50 | 3.23   | 0.01  | 0.03 | 0.57    | -0.01 | 1.63   |
| <b>South</b>              | -1.08 | 0.53 | 0.04    | -1.48 | 7.02   | -0.05 | 0.02 | 0.04    | -0.01 | 2.35   |
| <b>West</b>               | -0.03 | 0.60 | 0.96    | -4.12 | 2.87   | 0.01  | 0.03 | 0.82    | -0.02 | 1.34   |
| <b>Dementia status</b>    | -1.30 | 0.94 | 0.17    | -7.21 | 2.58   | -0.07 | 0.04 | 0.11    | 0.01  | 3.20   |
| <b>Comorbidities</b>      |       |      |         |       |        |       |      |         |       |        |
| <b>Arthritis</b>          | -1.29 | 0.40 | 0.00    | -7.90 | 1.01   | -0.02 | 0.02 | 0.33    | 0.00  | 4.27   |
| <b>Cancer</b>             | -0.88 | 0.42 | 0.04    | 0.05  | 179.71 | -0.01 | 0.02 | 0.58    | 0.00  | 6.37   |
| <b>Diabetes</b>           | 0.52  | 0.39 | 0.18    | -0.48 | 16.10  | 1.10  | 0.02 | < 2e-16 | 0.01  | 2.27   |
| <b>Heart</b>              | -2.12 | 0.37 | 0.00    | -0.55 | 13.41  | 0.06  | 0.02 | 0.00    | 0.00  | 233.08 |
| <b>Hypertension</b>       | 7.18  | 0.39 | < 2e-16 | 2.88  | 2.65   | 0.02  | 0.02 | 0.26    | 0.00  | 3.36   |
| <b>Lung disease</b>       | -2.41 | 0.52 | 0.00    | -3.56 | 2.90   | 0.00  | 0.02 | 0.90    | 0.00  | 7.79   |
| <b>Stroke</b>             | 0.19  | 0.54 | 0.73    | -1.42 | 7.58   | -0.04 | 0.02 | 0.06    | 0.00  | 5.57   |

Abbreviations: ADL, activities of daily living; Est, estimate; GED, General Educational Development; IADL, instrumental activities of daily living; ISNI, index of local sensitivity to nonignorability; MAR, missing at random; MinNI, minimum degree of nonignorability; Std. error, standard error



**Supplementary Table S16:** Frequency and mean number of potentially problematic medications among community-dwelling older adults with and without dementia overall and in the over-aggressive treatment of chronic conditions sub-domain for the primary cohort comparing methods using multiple imputation (MI) (primary analysis) and the index of local sensitivity to nonignorability (ISNI) (sensitivity analysis)

|                                                 |                             | Multiple Imputation (primary results) |                                    |                                       | ISNI method (sensitivity analysis) |                                    |                                       |
|-------------------------------------------------|-----------------------------|---------------------------------------|------------------------------------|---------------------------------------|------------------------------------|------------------------------------|---------------------------------------|
| Medication domain                               | Outcome measures            | Persons with dementia (n=1,441)       | Persons without dementia (n=1,441) | OR or IRR (95% CI)                    | Persons with dementia (n=1,441)    | Persons without dementia (n=1,441) | OR or IRR (95% CI)                    |
| Overall                                         | % with $\geq 1$ flagged med | 73%                                   | 67%                                | OR=1.34<br>(1.12, 1.62)<br>(p=0.002)  | 73%                                | 67%                                | OR=1.29<br>(1.08, 1.55)<br>(p<0.001)  |
|                                                 | Mean                        | 2.09                                  | 1.62                               | IRR=1.29<br>(1.17, 1.42)<br>(p<0.001) | 2.08                               | 1.62                               | IRR=1.28<br>(1.16, 1.41)<br>(p<0.001) |
| Medication overuse                              |                             |                                       |                                    |                                       |                                    |                                    |                                       |
| Over-aggressive treatment of chronic conditions | % with $\geq 1$ flagged med | 17%                                   | 14%                                | OR=1.25<br>(0.98, 1.60)<br>(p=0.07)   | 16%                                | 15%                                | OR=1.10<br>(0.88, 1.38)<br>(p=0.42)   |
|                                                 | Mean                        | 0.18                                  | 0.15                               | IRR=1.21<br>(0.98, 1.50)<br>(p=0.08)  | 0.16                               | 0.15                               | IRR=1.06<br>(0.87, 1.29)<br>(p=0.56)  |

Abbreviations: CI, confidence interval; IRR, incidence rate ratio; ISNI, index of local sensitivity to nonignorability; OR, odds ratio

**Supplementary Figure S1:** Example outline of cohort entry and timing of medication assessment for an individual enrolled in the Health and Retirement study<sup>a</sup>

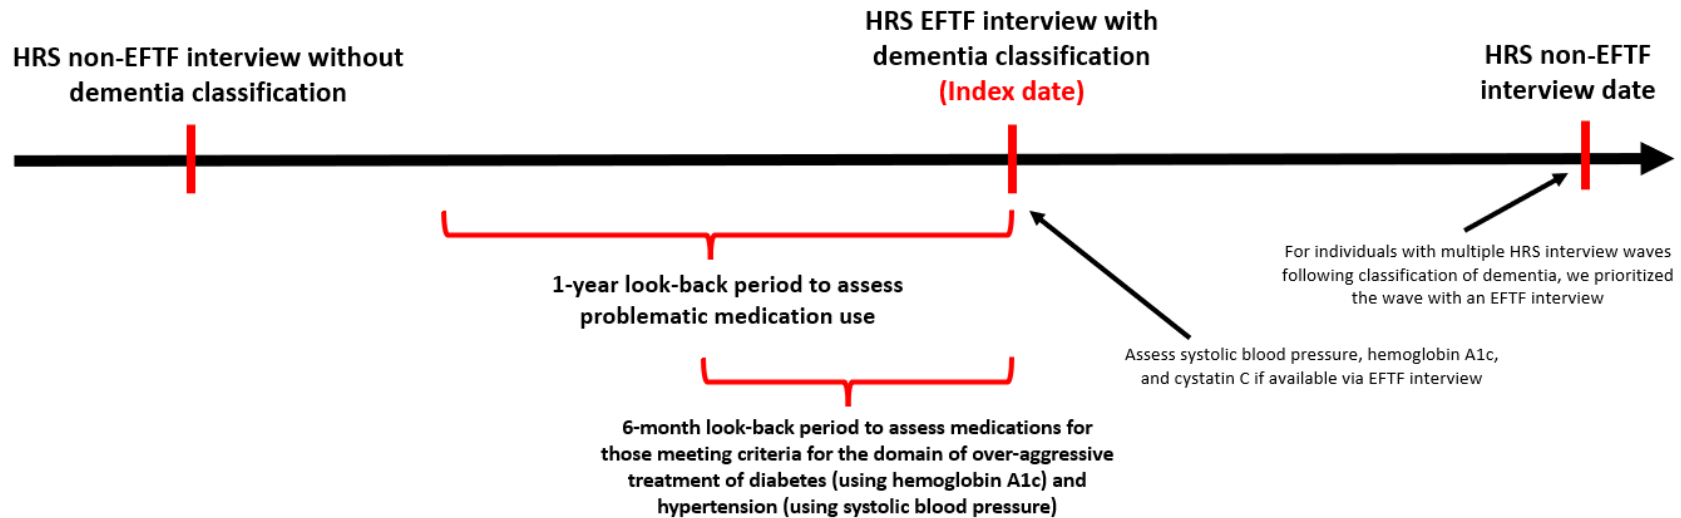

Abbreviations: EFTF, enhanced face-to-face; HRS, Health and Retirement Study

<sup>a</sup> This figure represents an example participant in the Health and Retirement Study who was followed for multiple interview waves. During their first interview wave, the participant did not have a dementia classification. During their second interview wave 2 years later, the participant had a dementia classification and participated in the enhanced face-to-face interview. During their third interview wave 2 years later, the participant had an additional non-enhanced face to face interview. Since we prioritized waves in which the individual participated in the enhanced face to face interview, we would select the second interview wave as the index date (first date when the individual was classified as having dementia and had enhanced face to face interview performed). Medication use was then assessed in the 1-year period prior to this index date. For over-aggressive treatment of diabetes/hypertension, we used a 6-month look-back period.

**Supplementary Figure S2:** Flow chart of individuals aged 66 years and older with and without dementia in the Health and Retirement Study from 2008-2018 included in this study

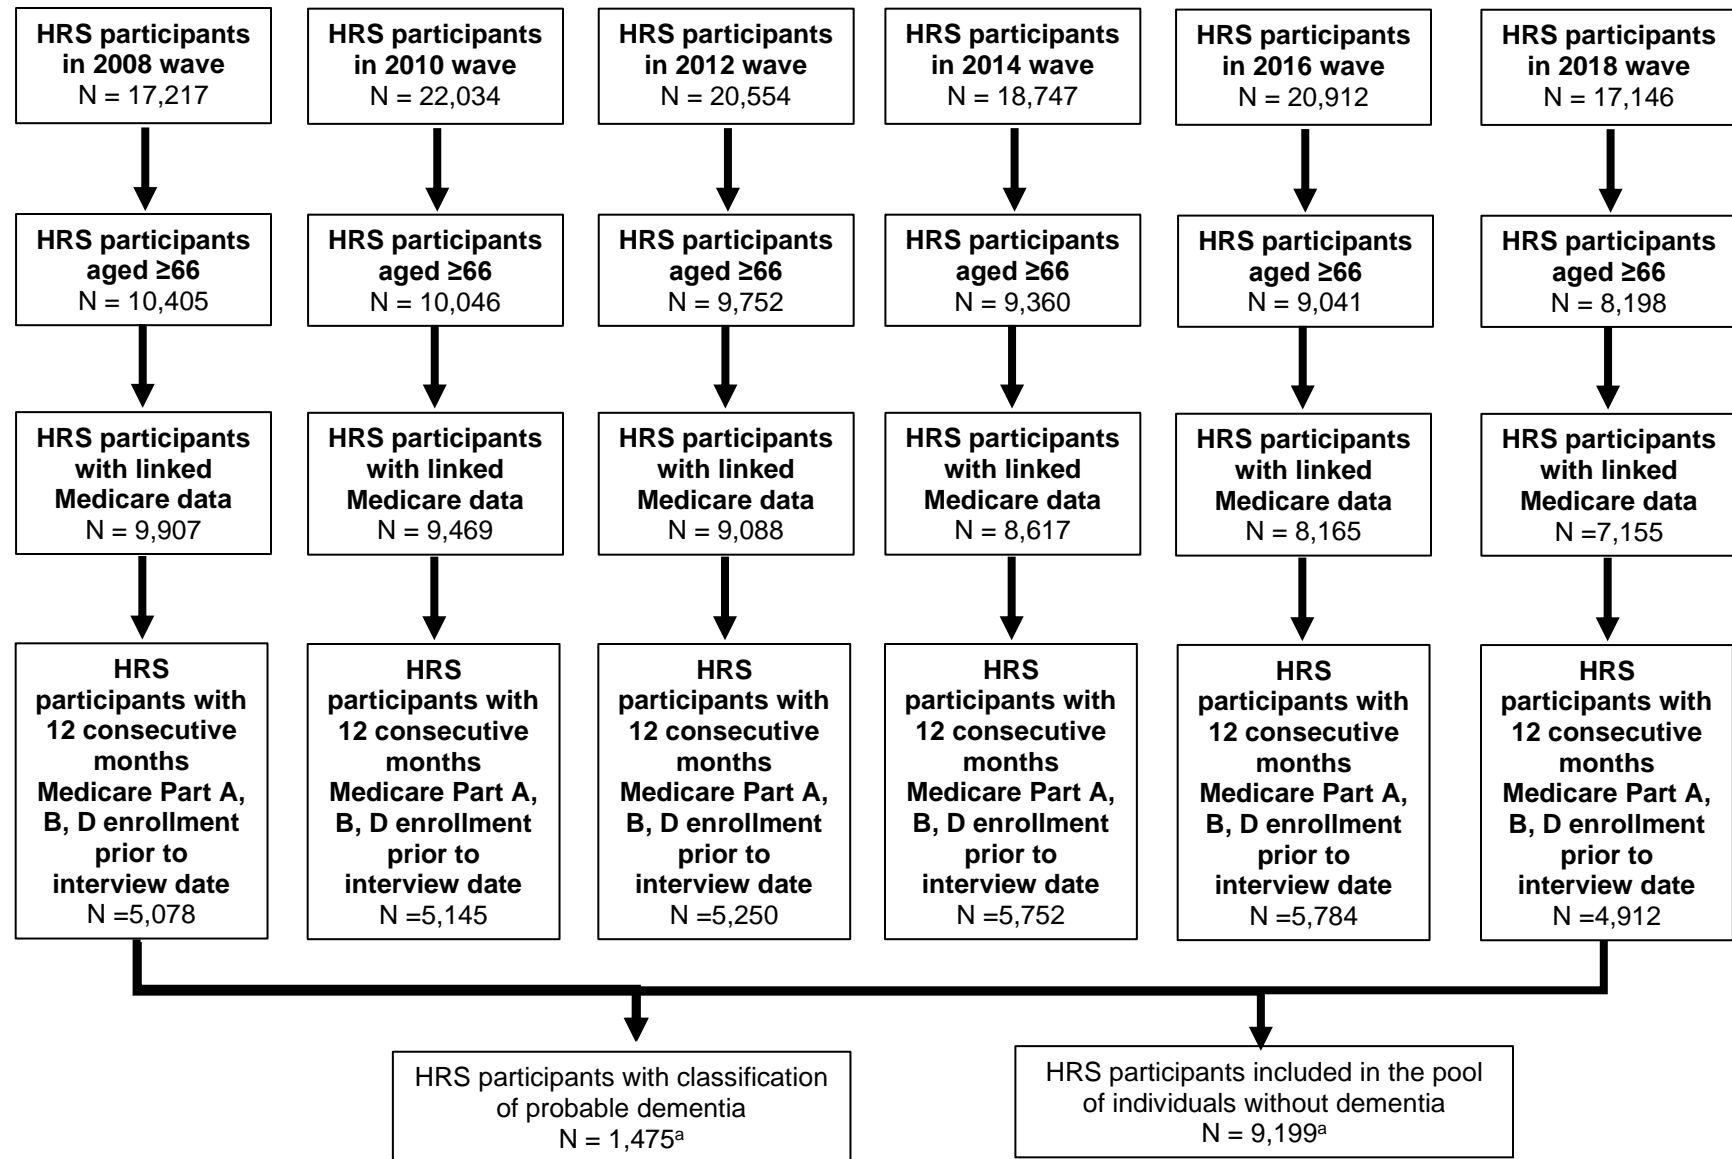

Abbreviations: HRS, Health and Retirement Study

a In the figure, many individuals participated in multiple HRS interview waves. Therefore, the sum total of people in at least one wave is much greater than the sum of participants in each individual wave. After applying our inclusion and exclusion criteria, a total of 9,844 distinct individuals were ultimately eligible. From this cohort, 1,475 distinct individuals were classified as having dementia during the study period based on the dementia classification algorithm. There were 9,199 individuals who were included in the control pool. The sum of these numbers ( $1,475 + 9,199 = 10,674$ ) is greater than 9,844 as some individuals were included in the control pool during earlier waves (no classification of dementia) before eventually having a classification of dementia during a later wave. For example, an individual who was interviewed in 2008 and 2010 and not classified as having dementia would be included in the control pool for those time points but could later be included in the dementia pool if they were classified as having dementia at the 2012 HRS interview wave.

**Supplementary Figure S3:** Distribution of the number of potentially problematic medications identified across all criteria among persons with and without dementia in the primary matched cohort

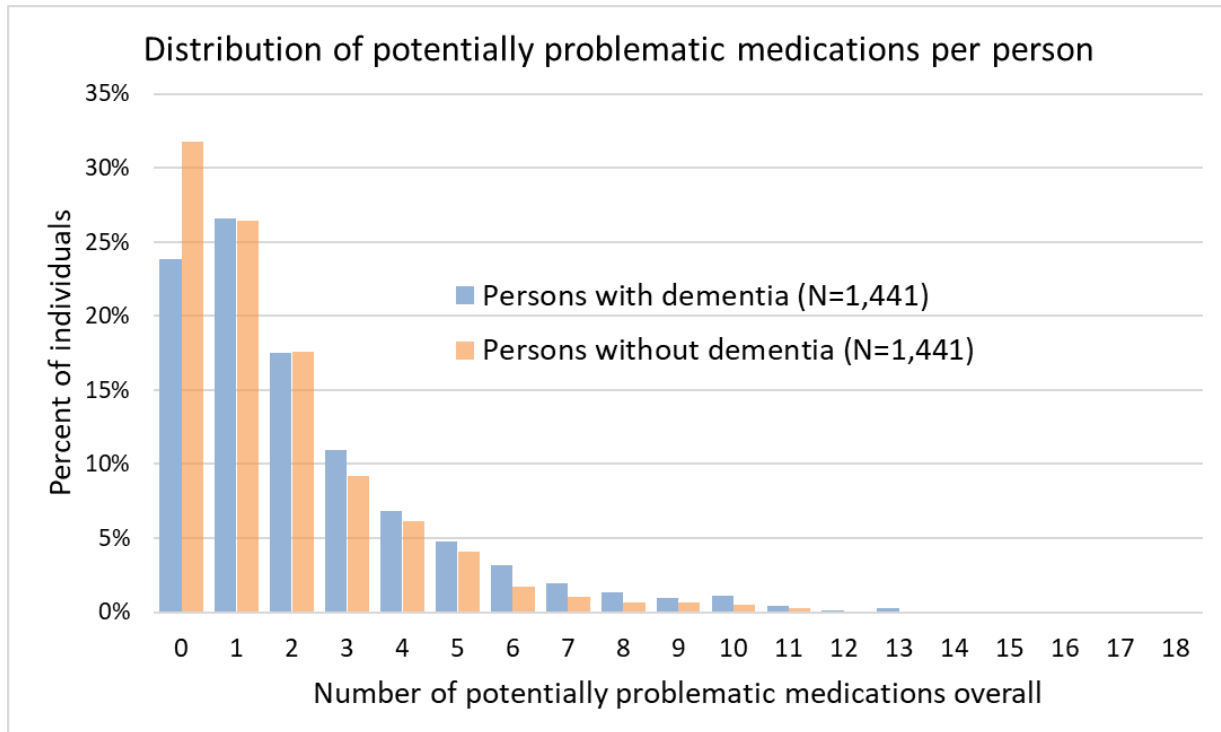

**Supplementary Figure S4:** Histograms representing the distribution of systolic blood pressure and hemoglobin A1c values under the different methods, including index of local sensitivity to nonignorability (ISNI), multiple imputation, and non-missing observed data

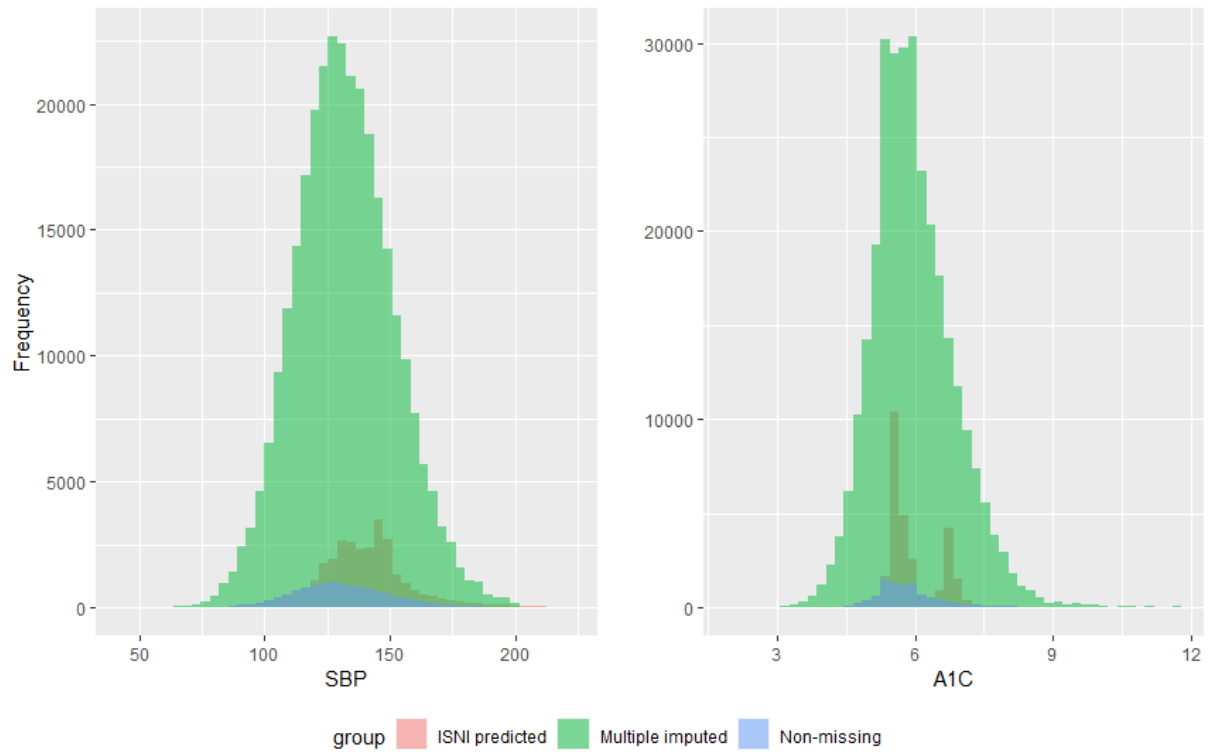

Abbreviations: A1c, hemoglobin A1c; ISNI, index of local sensitivity to nonignorability; SBP, systolic blood pressure

## **References:**

1. Hurd MD, Martorell P, Delavande A, Mullen KJ, Langa KM. Monetary Costs of Dementia in the United States. *N Engl J Med*. 2013;368(14):1326-1334. doi:10.1056/NEJMsa1204629
2. Langa KM, Plassman BL, Wallace RB, et al. The Aging, Demographics, and Memory Study: study design and methods. *Neuroepidemiology*. 2005;25(4):181-191. doi:10.1159/000087448
3. Gianattasio KZ, Wu Q, Glymour MM, Power MC. Comparison of Methods for Algorithmic Classification of Dementia Status in the Health and Retirement Study. *Epidemiology*. 2019;30(2):291-302. doi:10.1097/EDE.0000000000000945
4. 2019 American Geriatrics Society Beers Criteria Update Expert Panel. American Geriatrics Society 2019 Updated AGS Beers Criteria® for Potentially Inappropriate Medication Use in Older Adults. *Journal of the American Geriatrics Society*. 2019;67(4):674-694. doi:10.1111/jgs.15767
5. Al Rihani SB, Deodhar M, Darakjian LI, et al. Quantifying Anticholinergic Burden and Sedative Load in Older Adults with Polypharmacy: A Systematic Review of Risk Scales and Models. *Drugs Aging*. 2021;38(11):977-994. doi:10.1007/s40266-021-00895-x
6. Linjakumpu T, Hartikainen S, Klaukka T, Koponen H, Kivelä SL, Isoaho R. A model to classify the sedative load of drugs. *Int J Geriatr Psychiatry*. 2003;18(6):542-544. doi:10.1002/gps.846
7. Sloane P, Ivey J, Roth M, Roederer M, Williams CS. Accounting for the sedative and analgesic effects of medication changes during patient participation in clinical research studies: measurement development and application to a sample of institutionalized geriatric patients. *Contemp Clin Trials*. 2008;29(2):140-148. doi:10.1016/j.cct.2007.06.004
8. Growdon ME, Gan S, Yaffe K, Steinman MA. Polypharmacy among older adults with dementia compared with those without dementia in the United States. *Journal of the American Geriatrics Society*. 2021;69(9):2464-2475. doi:10.1111/jgs.17291
9. Huibers CJA, Salleveld BTGM, de Groot DA, et al. Conversion of STOPP/START version 2 into coded algorithms for software implementation: A multidisciplinary consensus procedure. *Int J Med Inform*. 2019;125:110-117. doi:10.1016/j.ijmedinf.2018.12.010
10. Ribe AR, Christensen LD, Vestergaard CH, et al. Potentially inappropriate medications (PIMs): frequency and extent of GP-related variation in PIMs: a register-based cohort study. *BMJ Open*. 2021;11(7):e046756. doi:10.1136/bmjopen-2020-046756
11. Schafer JL, Graham JW. Missing data: our view of the state of the art. *Psychol Methods*. 2002;7(2):147-177.
12. Heitjan DF, Rubin DB. Ignorability and Coarse Data. *The Annals of Statistics*. 1991;19(4):2244-2253. doi:10.1214/aos/1176348396

13. Rubin D. Inference and missing data. *Biometrika*. 1976;63(3):581-592.  
doi:10.1093/biomet/63.3.581
14. Troxel AB, Ma G, Heitjan DF. An Index of Local Sensitivity to Nonignorability. *Statistica Sinica*. 2004;14(4):1221-1237.



Supplementary Appendix: Details on the characterization of different criteria included in this study

| Domain                   | Criteria                                                                      |
|--------------------------|-------------------------------------------------------------------------------|
| Medication overuse       | Over-aggressive treatment of diabetes                                         |
| Medication overuse       | Over-aggressive treatment of hypertension                                     |
| Strongly anticholinergic | Selected antiarrhythmics (disopyramide)                                       |
| Strongly anticholinergic | Selected antidepressants                                                      |
| Strongly anticholinergic | Selected antiemetics                                                          |
| Strongly anticholinergic | First generation antihistamines                                               |
| Strongly anticholinergic | Urinary antimuscarinics                                                       |
| Strongly anticholinergic | Antiparkinson anticholinergics (e.g., benztropine/trihexyphenidyl)            |
| Strongly anticholinergic | Selected antipsychotics                                                       |
| Strongly anticholinergic | Antispasmodics                                                                |
| Strongly anticholinergic | Selected skeletal muscle relaxants                                            |
| Sedative-hypnotics       | Benzodiazepines                                                               |
| Sedative-hypnotics       | Z-drugs                                                                       |
| Sedative-hypnotics       | Selected antiepileptic drugs                                                  |
| Sedative-hypnotics       | Selected antipsychotics                                                       |
| Sedative-hypnotics       | Selected antihistamines                                                       |
| Sedative-hypnotics       | Additional antidepressant                                                     |
| STOPPFrail               | Lipid-lowering therapies (statins, ezetimibe, sequestrants, fibrates, niacin) |
| STOPPFrail               | Memantine in moderate to severe dementia                                      |
| STOPPFrail               | Theophylline and aminophylline                                                |
| STOPPFrail               | Anti-resorptive/bone anabolic drugs for osteoporosis                          |
| STOPPFrail               | NSAIDs for >2 months                                                          |
| STOPPFrail               | Drugs for overactive bladder (muscarinic antagonists and mirabegron)          |
| Beers (2019 version)     | First generation antihistamines                                               |
| Beers (2019 version)     | Antiparkinsonian agents                                                       |
| Beers (2019 version)     | Antispasmodics                                                                |
| Beers (2019 version)     | Dipyridamole                                                                  |
| Beers (2019 version)     | Nitrofurantoin                                                                |
| Beers (2019 version)     | Peripheral alpha-1 blockers for hypertension                                  |
| Beers (2019 version)     | Central alpha-agonists for hypertension (excluding clonidine)                 |
| Beers (2019 version)     | Disopyramide                                                                  |
| Beers (2019 version)     | Nifedipine, immediate release                                                 |
| Beers (2019 version)     | Selected antidepressants                                                      |
| Beers (2019 version)     | Antipsychotics except in schizophrenia/bipolar                                |
| Beers (2019 version)     | Barbiturates                                                                  |
| Beers (2019 version)     | Benzodiazepines                                                               |
| Beers (2019 version)     | Meprobamate                                                                   |
| Beers (2019 version)     | Z-drugs                                                                       |
| Beers (2019 version)     | Ergoloid mesylates                                                            |
| Beers (2019 version)     | Androgens without hypogonadism                                                |
| Beers (2019 version)     | Desiccated thyroid                                                            |
| Beers (2019 version)     | Estrogens (oral/topical patch)                                                |
| Beers (2019 version)     | Growth hormone                                                                |
| Beers (2019 version)     | Megestrol                                                                     |
| Beers (2019 version)     | Long-acting sulfonylureas                                                     |
| Beers (2019 version)     | Metoclopramide except for gastroparesis                                       |
| Beers (2019 version)     | PPI for >8 weeks unless high-risk patient                                     |
| Beers (2019 version)     | Meperidine                                                                    |
| Beers (2019 version)     | Non-COX-selective NSAIDs, chronic use (>90 days)                              |
| Beers (2019 version)     | Indomethacin, ketorolac                                                       |
| Beers (2019 version)     | Skeletal muscle relaxants                                                     |

|                      |                                                                      |
|----------------------|----------------------------------------------------------------------|
| Beers (2019 version) | Desmopressin                                                         |
| Beers (2019 version) | Cilostazol in heart failure                                          |
| Beers (2019 version) | NSAIDs (all) in heart failure                                        |
| Beers (2019 version) | Thiazolidinediones in heart failure                                  |
| Beers (2019 version) | Cholinesterase inhibitors in syncope                                 |
| Beers (2019 version) | Peripheral alpha-1 blockers in syncope                               |
| Beers (2019 version) | Tertiary TCAs in syncope                                             |
| Beers (2019 version) | Selected antipsychotics in syncope                                   |
| Beers (2019 version) | Selected antiemetics in Parkinson disease                            |
| Beers (2019 version) | Selected antipsychotics in Parkinson disease                         |
| Beers (2019 version) | Non-COX-selective NSAIDs with GI ulcers                              |
| Beers (2019 version) | NSAIDs (all) in CKD Stage 4 or higher                                |
| Beers (2019 version) | Estrogen in women with urinary incontinence                          |
| Beers (2019 version) | Peripheral alpha-1 blockers in women with urinary incontinence       |
| Beers (2019 version) | Strongly anticholinergic drugs with LUTS/BPH                         |
| Beers (2019 version) | Opioid and benzodiazepine in combination                             |
| Beers (2019 version) | Opioid and gabapentin/pregabalin in combination                      |
| Beers (2019 version) | Strongly anticholinergic and strongly anticholinergic in combination |
| Beers (2019 version) | Three or more CNS-active drugs                                       |
| Beers (2019 version) | TMP-SMX with reduced kidney function                                 |
| Beers (2019 version) | Amiloride with reduced kidney function                               |
| Beers (2019 version) | Apixaban with reduced kidney function                                |
| Beers (2019 version) | Dabigatran with reduced kidney function                              |
| Beers (2019 version) | Dofetilide with reduced kidney function                              |
| Beers (2019 version) | Edoxaban with reduced kidney function                                |
| Beers (2019 version) | Fondaparinux with reduced kidney function                            |
| Beers (2019 version) | Rivaroxaban with reduced kidney function                             |
| Beers (2019 version) | Spirolactone with reduced kidney function                            |
| Beers (2019 version) | Triamterene with reduced kidney function                             |
| Beers (2019 version) | Duloxetine with reduced kidney function                              |
| Beers (2019 version) | Tramadol with reduced kidney function                                |
| Beers (2019 version) | Probenecid with reduced kidney function                              |
| STOPP Version 2      | Verapamil/diltiazam with heart failure                               |
| STOPP Version 2      | Beta-blocker and verapamil/diltiazem in combination                  |
| STOPP Version 2      | Beta-blocker with bradycardia/heart block                            |
| STOPP Version 2      | Centrally-acting antihypertensives                                   |
| STOPP Version 2      | PDE-5 inhibitors in heart failure                                    |
| STOPP Version 2      | Antiplatelet/anticoagulant with significant bleeding risk            |
| STOPP Version 2      | Ticlopidine                                                          |
| STOPP Version 2      | NSAID and anticoagulant in combination                               |
| STOPP Version 2      | TCAs in dementia, glaucoma, BPH/urinary retention, cardiac issues    |
| STOPP Version 2      | Anticholinergic antipsychotics with BPH/urinary retention            |
| STOPP Version 2      | Selected antipsychotics in Parkinson disease                         |
| STOPP Version 2      | Strongly anticholinergics in dementia                                |
| STOPP Version 2      | Antipsychotics in BPSD                                               |
| STOPP Version 2      | Cholinesterase inhibitors in bradycardia/syncope/heart block         |
| STOPP Version 2      | Levodopa or dopamine agonists for benign essential tremor            |
| STOPP Version 2      | First generation antihistamines                                      |
| STOPP Version 2      | Digoxin at doses > 125 ug/day with reduced kidney function           |
| STOPP Version 2      | Direct thrombin inhibitors with reduced kidney function              |
| STOPP Version 2      | Factor Xa inhibitors with reduced kidney function                    |
| STOPP Version 2      | NSAIDs with reduced kidney function                                  |
| STOPP Version 2      | Colchicine with reduced kidney function                              |

|                 |                                                                                       |
|-----------------|---------------------------------------------------------------------------------------|
| STOPP Version 2 | Metformin with reduced kidney function                                                |
| STOPP Version 2 | Selected antiemetics with Parkinson disease (metoclopramide/prochlorperazine)         |
| STOPP Version 2 | PPI for >8 weeks unless high-risk patient                                             |
| STOPP Version 2 | Theophylline as monotherapy in COPD                                                   |
| STOPP Version 2 | Antimuscarinic bronchodilators with specific comorbidities (inhaled anticholinergics) |
| STOPP Version 2 | COX-2 selective NSAIDs with CV disease                                                |
| STOPP Version 2 | Oral bisphosphonate with GI issues                                                    |
| STOPP Version 2 | Bladder antimuscarinics with dementia, narrow angle glaucoma, BPH                     |
| STOPP Version 2 | Long-acting sulfonylureas                                                             |
| STOPP Version 2 | Thiazolidinediones in heart failure                                                   |
| STOPP Version 2 | Estrogens with breast cancer/VTE                                                      |
| STOPP Version 2 | Androgens without hypogonadism                                                        |
| STOPP Version 2 | Benzodiazepines                                                                       |
| STOPP Version 2 | Z-drugs                                                                               |
| STOPP Version 2 | Strongly anticholinergic and strongly anticholinergic in combination (same as Beers)  |

### Medication Overuse

| METADATA ID | METADATA Description                      | METADATA                                                                                              | A<br>Diagnosis code          | B<br>Diagnosis code                           | C<br>Medication code<br>Aspirin                                     | RISK                                   | NOTES                                                                                                                                                                  | Limitations/Issues                                                                                                                               |                                                                          |                                                                                                                                                                                                                                                                                                                                                                                                  |
|-------------|-------------------------------------------|-------------------------------------------------------------------------------------------------------|------------------------------|-----------------------------------------------|---------------------------------------------------------------------|----------------------------------------|------------------------------------------------------------------------------------------------------------------------------------------------------------------------|--------------------------------------------------------------------------------------------------------------------------------------------------|--------------------------------------------------------------------------|--------------------------------------------------------------------------------------------------------------------------------------------------------------------------------------------------------------------------------------------------------------------------------------------------------------------------------------------------------------------------------------------------|
|             | Aspirin                                   | ICD9<br>ICD10<br>Medication variable                                                                  |                              |                                               | Omitted as very few people are getting aspirin through prescription |                                        |                                                                                                                                                                        | Most of the people are receiving dipyridamole/aspirin combination which is unlikely to represent a primary prevention population                 |                                                                          |                                                                                                                                                                                                                                                                                                                                                                                                  |
| METADATA ID | METADATA Description                      | METADATA                                                                                              | A<br>Medication code<br>Iron | B<br>Diagnosis code<br>Iron deficiency anemia | C                                                                   | CODE                                   | NOTES                                                                                                                                                                  | Limitations/Issues                                                                                                                               |                                                                          |                                                                                                                                                                                                                                                                                                                                                                                                  |
|             | Iron supplementation                      | ICD9 / CCS for ICD9<br>ICD10 / CCS for ICD10<br>Medication variable                                   |                              |                                               | Omitted as very few people are getting iron through prescription    |                                        |                                                                                                                                                                        |                                                                                                                                                  |                                                                          |                                                                                                                                                                                                                                                                                                                                                                                                  |
| METADATA ID | METADATA Description                      | METADATA                                                                                              | A<br>Laboratory value<br>A1c | B<br>Medication code<br>Insulin               | C<br>Medication code<br>Sulfonylurea                                | D<br>Diagnosis code<br>Type 2 diabetes | RISK                                                                                                                                                                   | CODE                                                                                                                                             | NOTES                                                                    | Limitations/Issues                                                                                                                                                                                                                                                                                                                                                                               |
|             | Over-aggressive treatment of diabetes     | ICD9 / CCS for ICD9<br>ICD10 / CCS for ICD10<br>Medication variable<br>Laboratory value<br>A1c < 7.5% |                              | insulin                                       | sulfonylurea                                                        | E11*                                   | A & (B   C within 180 days of A1c)                                                                                                                                     |                                                                                                                                                  | A & (Prescription for B   C within 180 days prior to A1c blood draw) & D | 1. Only include diagnosis codes for Type 2 diabetes (do not want to include patients with Type 1 diabetes) 2. Only includes medications with highest hypoglycemia risk 3. Assess medication prescription 180 days before<br><br>Presumes doctor knows a recent A1c although they will not have the HRS blood draw result. Cannot differentiate decreasing insulin dose in response to A1c < 7.5. |
| METADATA ID | METADATA Description                      | METADATA                                                                                              | A<br>Diagnosis codes         | B<br>Medication code                          | C                                                                   | CODE                                   | NOTES                                                                                                                                                                  | Limitations/Issues                                                                                                                               |                                                                          |                                                                                                                                                                                                                                                                                                                                                                                                  |
|             | Over-aggressive treatment of hypertension | ICD9 / CCS for ICD9<br>ICD10 / CCS for ICD10<br>Medication variable                                   |                              | See supplementary methods section for details |                                                                     |                                        | 1. Time window of prescription within 180 days of BP measurement 2. Applies only to those with average SBP < 110 based on 3 measurements during face-to-face interview | Defining over-treatment based on blood pressure readings on a single day, which may not be reflective of blood pressures over longer time period |                                                                          |                                                                                                                                                                                                                                                                                                                                                                                                  |

| Medications inappropriate near the end of life (only applied to those with limited life expectancy)                                                                                                                                                                                                                                                                                                                                                                                                                                                                                                                                                                |                                                                  |                                                                                                                                                                                                                                                |                                             |                   |      |      |                                                                                                                                                                                  |                                                                     |  |
|--------------------------------------------------------------------------------------------------------------------------------------------------------------------------------------------------------------------------------------------------------------------------------------------------------------------------------------------------------------------------------------------------------------------------------------------------------------------------------------------------------------------------------------------------------------------------------------------------------------------------------------------------------------------|------------------------------------------------------------------|------------------------------------------------------------------------------------------------------------------------------------------------------------------------------------------------------------------------------------------------|---------------------------------------------|-------------------|------|------|----------------------------------------------------------------------------------------------------------------------------------------------------------------------------------|---------------------------------------------------------------------|--|
| <p>Rules represent the STOPPP criteria applied to participants with limited life expectancy, which was operationalized as 50% mortality rate at 1 year based on the Gagne mortality index. This corresponds to a comorbidity score &gt;9 (<a href="https://pubmed.ncbi.nlm.nih.gov/21287765/">https://pubmed.ncbi.nlm.nih.gov/21287765/</a>), applying the STOPPP criteria to SDR data was partially adapted from "Use and Appropriateness of Potentially Inappropriate Medications in Post-Nursing Home Residents" (<a href="https://link.springer.com/article/10.1007/s12063-020-00865-7">https://link.springer.com/article/10.1007/s12063-020-00865-7</a>).</p> |                                                                  |                                                                                                                                                                                                                                                |                                             |                   |      |      |                                                                                                                                                                                  |                                                                     |  |
| MEDDATA ID                                                                                                                                                                                                                                                                                                                                                                                                                                                                                                                                                                                                                                                         | MEDDATA Medication                                               | MEDDATA ICD9 / CCS for ICD9 / CCS for ICD10                                                                                                                                                                                                    | A Medication code                           | B Medication code | RISK | CODE | NOTES                                                                                                                                                                            | Limitations/Issues                                                  |  |
| 1                                                                                                                                                                                                                                                                                                                                                                                                                                                                                                                                                                                                                                                                  | Liquid levetiracetam                                             | Liquid levetiracetam, including tablets, extended-release tablets, oral suspension, tablets, extended-release tablets                                                                                                                          | ICD9 / CCS for ICD9<br>ICD9 / CCS for ICD10 | A                 | A    |      | 1. Antiepileptics variable includes all drugs with code combinations: acetaminophen, ibuprofen, aspirin, acetaminophen, ibuprofen, aspirin, acetaminophen, ibuprofen, aspirin    | Site and requests are sometimes used off-label for chronic diarrhea |  |
| 2                                                                                                                                                                                                                                                                                                                                                                                                                                                                                                                                                                                                                                                                  | Antihypertensive therapy                                         | Antihypertensive therapy (carefully reduce or discontinue based on drug to patients with systolic blood pressure (SBP) persistently <130 mmHg)                                                                                                 | Medication code                             | B Medication code | RISK | CODE | NOTES                                                                                                                                                                            | Limitations/Issues                                                  |  |
| 3                                                                                                                                                                                                                                                                                                                                                                                                                                                                                                                                                                                                                                                                  | Anti-anginal therapy (exclusive of nitroglycerin, nitroglycerin) | Anti-anginal therapy (exclusive of nitroglycerin, nitroglycerin), including those drugs in patients who have had no reported anginal symptoms in the previous 3 months AND who have no previous objective evidence of coronary artery disease  | Medication code                             | B Medication code | RISK | CODE | NOTES                                                                                                                                                                            | Limitations/Issues                                                  |  |
| 4                                                                                                                                                                                                                                                                                                                                                                                                                                                                                                                                                                                                                                                                  | Aspirin for primary cardiovascular prevention                    | Aspirin for primary cardiovascular prevention                                                                                                                                                                                                  | Medication code                             | B Medication code | RISK | CODE | NOTES                                                                                                                                                                            | Limitations/Issues                                                  |  |
| 5                                                                                                                                                                                                                                                                                                                                                                                                                                                                                                                                                                                                                                                                  | Aspirin for atrial fibrillation                                  | Aspirin for atrial fibrillation                                                                                                                                                                                                                | Medication code                             | B Medication code | RISK | CODE | NOTES                                                                                                                                                                            | Limitations/Issues                                                  |  |
| 6                                                                                                                                                                                                                                                                                                                                                                                                                                                                                                                                                                                                                                                                  | Antipsychotics in patients with dementia                         | Neuroleptic antipsychotics in patients with dementia. Aim to reduce dose and discontinue these drugs in patients using them for longer than 12 weeks. These are only covering delirium, not dementia and psychotic symptoms of dementia (SPMS) | ICD9 / CCS for ICD9<br>ICD9 / CCS for ICD10 | A                 | A    |      | 1. Not able to operationalize "Patients receiving clozapine improve SPMS" Medication may be appropriate to continue in PWD in a year of life if they are on clozapine to capture | Limitations/Issues                                                  |  |
| 7                                                                                                                                                                                                                                                                                                                                                                                                                                                                                                                                                                                                                                                                  | Mnemonic to screen responders to screen dementia                 | Mnemonic: Discontinue and monitor in patients with responders to screen dementia, unless responder has clearly improved SPMS                                                                                                                   | ICD9 / CCS for ICD9<br>ICD9 / CCS for ICD10 | A                 | A    |      |                                                                                                                                                                                  | Limitations/Issues                                                  |  |
| 8                                                                                                                                                                                                                                                                                                                                                                                                                                                                                                                                                                                                                                                                  | Proton pump inhibitors for acid reflux                           | Proton pump inhibitors. Reduce dose of proton pump inhibitors when used at full therapeutic dose all weeks, unless persistent symptoms or severe gastroesophageal reflux disease                                                               | ICD9 / CCS for ICD9<br>ICD9 / CCS for ICD10 | A                 | A    |      |                                                                                                                                                                                  | Limitations/Issues                                                  |  |
| 9                                                                                                                                                                                                                                                                                                                                                                                                                                                                                                                                                                                                                                                                  | H2 antagonists for acid reflux                                   | H2 antagonists. Reduce dose of H2 antagonists when used at full therapeutic dose all weeks, unless persistent symptoms or severe gastroesophageal reflux disease                                                                               | ICD9 / CCS for ICD9<br>ICD9 / CCS for ICD10 | A                 | A    |      |                                                                                                                                                                                  | Limitations/Issues                                                  |  |
| 10                                                                                                                                                                                                                                                                                                                                                                                                                                                                                                                                                                                                                                                                 | Theophylline and aminophylline                                   | Theophylline and aminophylline (same therapeutic blood level, blood level, serum level, serum level, monitoring of serum levels)                                                                                                               | ICD9 / CCS for ICD9<br>ICD9 / CCS for ICD10 | A                 | A    |      |                                                                                                                                                                                  | Limitations/Issues                                                  |  |
| 11                                                                                                                                                                                                                                                                                                                                                                                                                                                                                                                                                                                                                                                                 | Levodopa in patients with Parkinson's disease                    | Levodopa in patients with Parkinson's disease. Levodopa in patients with Parkinson's disease. Levodopa in patients with Parkinson's disease                                                                                                    | ICD9 / CCS for ICD9<br>ICD9 / CCS for ICD10 | A                 | A    |      |                                                                                                                                                                                  | Limitations/Issues                                                  |  |
| 12                                                                                                                                                                                                                                                                                                                                                                                                                                                                                                                                                                                                                                                                 | Calcium supplements                                              | Calcium supplements. Continue to use for up to 6 months in short-term calcium deficiency, symptomatic hypocalcemia                                                                                                                             | ICD9 / CCS for ICD9<br>ICD9 / CCS for ICD10 | A                 | A    |      |                                                                                                                                                                                  | Limitations/Issues                                                  |  |
| 13                                                                                                                                                                                                                                                                                                                                                                                                                                                                                                                                                                                                                                                                 | Vitamin D                                                        | Vitamin D (ergocalciferol and cholecalciferol). Lack of clear evidence to support the use of vitamin D to prevent falls and fractures, cardiovascular events or cancer                                                                         | ICD9 / CCS for ICD9<br>ICD9 / CCS for ICD10 | A                 | A    |      |                                                                                                                                                                                  | Limitations/Issues                                                  |  |
| 14                                                                                                                                                                                                                                                                                                                                                                                                                                                                                                                                                                                                                                                                 | Anti-neoplastic drug (excluding chemotherapy)                    | Anti-neoplastic drug (excluding chemotherapy). Anti-neoplastic drug (excluding chemotherapy). Anti-neoplastic drug (excluding chemotherapy)                                                                                                    | ICD9 / CCS for ICD9<br>ICD9 / CCS for ICD10 | A                 | A    |      |                                                                                                                                                                                  | Limitations/Issues                                                  |  |
| 15                                                                                                                                                                                                                                                                                                                                                                                                                                                                                                                                                                                                                                                                 | Long-term NSAIDs (3 months)                                      | Long-term oral NSAID use. Increased risk of side effects (e.g., peptic ulcer disease, bleeding, worsening heart failure) when taken regularly for >12 months                                                                                   | ICD9 / CCS for ICD9<br>ICD9 / CCS for ICD10 | A                 | A    |      |                                                                                                                                                                                  | Limitations/Issues                                                  |  |
| 16                                                                                                                                                                                                                                                                                                                                                                                                                                                                                                                                                                                                                                                                 | Long-term corticosteroids (>2 weeks)                             | Long-term oral corticosteroids. Increased risk of major side effects when taken regularly for >12 months. Consider possible dose reduction and discontinuation                                                                                 | ICD9 / CCS for ICD9<br>ICD9 / CCS for ICD10 | A                 | A    |      |                                                                                                                                                                                  | Limitations/Issues                                                  |  |
| 17                                                                                                                                                                                                                                                                                                                                                                                                                                                                                                                                                                                                                                                                 | Drug for beta-1 hypertension in patients                         | Drug for beta-1 hypertension (D-alpha-glycine) in patients with hypertension. No benefit with long-term beta-1 blockade                                                                                                                        | ICD9 / CCS for ICD9<br>ICD9 / CCS for ICD10 | A                 | A    |      |                                                                                                                                                                                  | Limitations/Issues                                                  |  |
| 18                                                                                                                                                                                                                                                                                                                                                                                                                                                                                                                                                                                                                                                                 | Drug for beta-2 hypertension in patients                         | Drug for beta-2 hypertension (D-alpha-glycine) in patients with hypertension. No benefit with long-term beta-2 blockade                                                                                                                        | ICD9 / CCS for ICD9<br>ICD9 / CCS for ICD10 | A                 | A    |      |                                                                                                                                                                                  | Limitations/Issues                                                  |  |
| 19                                                                                                                                                                                                                                                                                                                                                                                                                                                                                                                                                                                                                                                                 | Diuretic for hypertension                                        | Diuretic for hypertension. Discontinue when prescribed for hypertension other than treatment of hypertension                                                                                                                                   | ICD9 / CCS for ICD9<br>ICD9 / CCS for ICD10 | A                 | A    |      |                                                                                                                                                                                  | Limitations/Issues                                                  |  |
| 20                                                                                                                                                                                                                                                                                                                                                                                                                                                                                                                                                                                                                                                                 | Anti-diabetic drug                                               | Anti-diabetic drug (insulin). Insulin (if not associated with self-harm in the population)                                                                                                                                                     | ICD9 / CCS for ICD9<br>ICD9 / CCS for ICD10 | A                 | A    |      |                                                                                                                                                                                  | Limitations/Issues                                                  |  |
| 21                                                                                                                                                                                                                                                                                                                                                                                                                                                                                                                                                                                                                                                                 | Multivitamins                                                    | Multivitamin combination supplements. Discontinue when prescribed for other than other than treatment of hypertension                                                                                                                          | ICD9 / CCS for ICD9<br>ICD9 / CCS for ICD10 | A                 | A    |      |                                                                                                                                                                                  | Limitations/Issues                                                  |  |
| 22                                                                                                                                                                                                                                                                                                                                                                                                                                                                                                                                                                                                                                                                 | Folic acid                                                       | Folic acid. Discontinue when treatment course is completed. This does not include folic acid in patients with malabsorption, malnutrition or concurrent methotrexate use                                                                       | ICD9 / CCS for ICD9<br>ICD9 / CCS for ICD10 | A                 | A    |      |                                                                                                                                                                                  | Limitations/Issues                                                  |  |
| 23                                                                                                                                                                                                                                                                                                                                                                                                                                                                                                                                                                                                                                                                 | Nutritional supplements                                          | Nutritional supplements. Discontinue when prescribed for purposes other than treatment of malnutrition                                                                                                                                         | ICD9 / CCS for ICD9<br>ICD9 / CCS for ICD10 | A                 | A    |      |                                                                                                                                                                                  | Limitations/Issues                                                  |  |



## Sedative hypnotics

### Medication list modified from sedative load model and Growdon et al. (2020)

| METADATA ID | METADATA Description                                                                                                                                                                               | METADATA                                     | A Medication code                         | B Diagnosis code | RISK | CODE | NOTES                                     | Limitations/Issues |
|-------------|----------------------------------------------------------------------------------------------------------------------------------------------------------------------------------------------------|----------------------------------------------|-------------------------------------------|------------------|------|------|-------------------------------------------|--------------------|
|             |                                                                                                                                                                                                    |                                              | <i>Benzodiazepines</i>                    |                  |      |      |                                           |                    |
|             | Alprazolam, chlordiazepoxide, clorazepate, diazepam, halazepam, lorazepam, oxazepam, prazepam, clobazam, clonazepam, midazolam, estazolam, flurazepam, quazepam, remimazolam, remazepam, triazolam | ICD9 / CCS for ICD9<br>ICD10 / CCS for ICD10 | benzo                                     |                  | A    | A    |                                           |                    |
|             |                                                                                                                                                                                                    | Medication variable                          |                                           |                  |      |      |                                           |                    |
|             |                                                                                                                                                                                                    |                                              | <i>Non-benzo sedative hypnotics</i>       |                  |      |      |                                           |                    |
|             | Zolpidem, zaleplon, eszopiclone                                                                                                                                                                    | ICD9 / CCS for ICD9<br>ICD10 / CCS for ICD10 | z_drug                                    |                  | A    | A    |                                           |                    |
|             |                                                                                                                                                                                                    | Medication variable                          |                                           |                  |      |      |                                           |                    |
|             |                                                                                                                                                                                                    |                                              | <i>antiepileptic</i>                      |                  |      |      |                                           |                    |
|             | Phenobarbital, gabapentin, pregabalin                                                                                                                                                              | ICD9 / CCS for ICD9<br>ICD10 / CCS for ICD10 | antiepileptic                             |                  | A    | A    |                                           |                    |
|             |                                                                                                                                                                                                    | Medication variable                          |                                           |                  |      |      |                                           |                    |
|             |                                                                                                                                                                                                    |                                              | <i>Sedating antipsychotics</i>            |                  |      |      |                                           |                    |
|             | All first generation antipsychotics, quetiapine, olanzapine, and clozapine                                                                                                                         | ICD9 / CCS for ICD9<br>ICD10 / CCS for ICD10 | antipsychotics_sedating                   |                  | A    | A    |                                           |                    |
|             |                                                                                                                                                                                                    | Medication variable                          |                                           |                  |      |      |                                           |                    |
|             |                                                                                                                                                                                                    |                                              | <i>Promethazine &amp; diphenhydramine</i> |                  |      |      |                                           |                    |
|             |                                                                                                                                                                                                    | ICD9 / CCS for ICD9                          |                                           |                  |      |      |                                           |                    |
|             |                                                                                                                                                                                                    | ICD10 / CCS for ICD10                        |                                           |                  |      |      |                                           |                    |
|             | Promethazine and diphenhydramine                                                                                                                                                                   |                                              | antihistamine_sedative_load               |                  | A    | A    |                                           |                    |
|             |                                                                                                                                                                                                    | Medication variable                          |                                           |                  |      |      |                                           |                    |
|             |                                                                                                                                                                                                    |                                              | <i>Doxepin</i>                            |                  |      |      |                                           |                    |
|             | Doxepin                                                                                                                                                                                            | ICD9 / CCS for ICD9<br>ICD10 / CCS for ICD10 | doxepin                                   |                  | A    | A    | 1. Includes low-dose doxepin for insomnia |                    |
|             |                                                                                                                                                                                                    | Medication variable                          |                                           |                  |      |      |                                           |                    |

**STOPP Version 2 Criteria**

Definitions modified from: Ribe et al. 2021 (<https://bmjopen.bmj.com/content/11/7/e046756>) & Huibers et al. 2019 (<https://pubmed.ncbi.nlm.nih.gov/30914175/>)

| METADATA ID                                                    | METADATA Description                                                                                                                                                                                                                                                                                                         | METADATA                                     | A Medication code      | B Diagnosis code        | C Diagnosis code                                                      | RISK | CODE | NOTES | Limitations/Issues                                                                                                                                                                                                                  |
|----------------------------------------------------------------|------------------------------------------------------------------------------------------------------------------------------------------------------------------------------------------------------------------------------------------------------------------------------------------------------------------------------|----------------------------------------------|------------------------|-------------------------|-----------------------------------------------------------------------|------|------|-------|-------------------------------------------------------------------------------------------------------------------------------------------------------------------------------------------------------------------------------------|
| B1. Digoxin for heart failure with normal systolic function    | Stop digoxin for heart failure with normal systolic ventricular function (no clear evidence of benefit)                                                                                                                                                                                                                      | ICD9 / CCS for ICD9<br>ICD10 / CCS for ICD10 | Digoxin                | diastolic heart failure | atrial fibrillation                                                   |      |      |       | Omitted due to lack of information on systolic ventricular function                                                                                                                                                                 |
| B2. Verapamil or diltiazem + NYHA Class II or IV heart failure | Verapamil or diltiazem with NYHA Class III or IV heart failure (may worsen heart failure)                                                                                                                                                                                                                                    | ICD9 / CCS for ICD9<br>ICD10 / CCS for ICD10 | Verapamil or diltiazem | Heart failure           |                                                                       |      |      |       | 1. "NYHA Class III or IV heart failure" excluded from definition. 2. No well-established criteria for assessing heart failure from diagnosis codes. The ICD codes included here reflect a consensus from several different sources. |
| B3. Beta-blocker + verapamil/diltiazem                         | Beta-blocker in combination with verapamil or diltiazem (risk of heart block)                                                                                                                                                                                                                                                | ICD9 / CCS for ICD9<br>ICD10 / CCS for ICD10 | beta_blocker           | verapamil_diltiazem     |                                                                       |      |      |       | 1. Impossible to know from prescription drug data whether the patient was taking both simultaneously versus patient being told by physician to take one instead of the other                                                        |
| B4. Beta-blocker with bradycardia or heart block               | Beta blocker with bradycardia (< 50/min), type II heart block, or complete heart block (risk of complete heart block, asystole)                                                                                                                                                                                              | ICD9 / CCS for ICD9<br>ICD10 / CCS for ICD10 | beta_blocker           |                         |                                                                       |      |      |       | 1. Diagnosis code for bradycardia/heart block or HR measurement < 50 within 6 months of beta-blocker prescription 2. Heart rate measurement comes from HRS face-to-face interview                                                   |
| B5. Amiodarone as first-line antiarrhythmic for SVT            | Amiodarone as first-line antiarrhythmic therapy in supraventricular tachyarrhythmias (higher risk of side-effects than beta-blockers, digoxin, verapamil or diltiazem)                                                                                                                                                       | ICD9 / CCS for ICD9<br>ICD10 / CCS for ICD10 | Amiodarone             | SVT                     |                                                                       |      |      |       | Omitted due to difficulty in operationalizing first-line therapy                                                                                                                                                                    |
| B6. Loop diuretic as first-line treatment for hypertension     | Loop diuretic as first-line treatment for hypertension (safer, more effective alternatives available)                                                                                                                                                                                                                        | ICD9 / CCS for ICD9<br>ICD10 / CCS for ICD10 | Loop diuretics         | Hypertension            | Other antihypertensives (CCBs, thiazides, ACE/ARB, potassium-sparing) |      |      |       | Omitted due to difficulty in operationalizing first-line therapy                                                                                                                                                                    |
| B7. Loop diuretic for dependent ankle edema                    | Loop diuretic for dependent ankle edema without clinical, biochemical evidence or radiological evidence of heart failure, liver failure, nephrotic syndrome or renal failure (leg elevation and/or compression hosiery usually more appropriate)                                                                             | ICD9 / CCS for ICD9<br>ICD10 / CCS for ICD10 |                        |                         |                                                                       |      |      |       | Omitted due to difficulty in operationalizing                                                                                                                                                                                       |
| B8. Thiazide diuretics with electrolyte abnormalities          | Stop thiazide diuretic with current significant hypokalaemia (i.e. serum K+ < 3.0 mmol/l), hyponatraemia (i.e. serum Na+ < 130 mmol/l) hypercalcaemia (i.e. corrected serum calcium > 2.65 mmol/l) or with a history of gout (hypokalaemia, hyponatraemia, hypercalcaemia and gout can be precipitated by thiazide diuretic) | ICD9 / CCS for ICD9<br>ICD10 / CCS for ICD10 |                        |                         |                                                                       |      |      |       | Omitted due to lack of information on lab values                                                                                                                                                                                    |
| B9. Loop diuretic and urinary incontinence                     | Loop diuretic for treatment of hypertension with concurrent urinary incontinence (may exacerbate incontinence)                                                                                                                                                                                                               | ICD9 / CCS for ICD9<br>ICD10 / CCS for ICD10 |                        |                         |                                                                       |      |      |       | Omitted due to difficulty in operationalizing                                                                                                                                                                                       |
| B10. Centrally-acting antihypertensives                        | Centrally-acting antihypertensives (e.g. methyldopa, clonidine, moxonidine, rilmenidine, guanfacine), unless clear intolerance of, or lack of efficacy with, other classes of antihypertensives (centrally-acting antihypertensives are generally less well tolerated by older people than younger people)                   | ICD9 / CCS for ICD9<br>ICD10 / CCS for ICD10 | cts_alpha_agonists     |                         |                                                                       |      |      |       | 1. "Not possible to code" unless clear intolerance of, or lack of efficacy with, other classes of antihypertensives.                                                                                                                |
| B11. ACEi/ARB in hyperkalemia                                  | Stop ACE inhibitors or Angiotensin Receptor Blockers in patients with hyperkalemia                                                                                                                                                                                                                                           | ICD9 / CCS for ICD9<br>ICD10 / CCS for ICD10 |                        |                         |                                                                       |      |      |       | Omitted due to lack of information on lab values                                                                                                                                                                                    |
| B12. Aldosterone antagonists and ACE(ARB) without monitoring   | Stop aldosterone antagonists (e.g. spironolactone, eplerenone) with concurrent potassium-sparing drugs (e.g. ACE's, ARB's, amiloride, triamterene) without monitoring of serum potassium (risk of dangerous hyperkalemia i.e. > 6.0 mmol/l) - serum K should be monitored regularly, i.e. at least every 6 months.           | ICD9 / CCS for ICD9<br>ICD10 / CCS for ICD10 |                        |                         |                                                                       |      |      |       | Omitted due to lack of information on lab values and frequency of monitoring for hyperkalemia                                                                                                                                       |
| B13. PDE-5 inhibitors in heart failure                         | Stop phosphodiesterase type-5 inhibitors (e.g. sildenafil, tadalafil, vardenafil) in severe heart failure characterized by hypertension (i.e. systolic BP > 160 mmHg) or concurrent                                                                                                                                          | ICD9 / CCS for ICD9<br>ICD10 / CCS for ICD10 | PDE-5 inhibitors       | Heart failure           |                                                                       |      |      |       | 1. Excludes PRN nitrates like sublingual nitroglycerin<br>1. Not possible to encode severe heart failure                                                                                                                            |



nitrate therapy for angina (risk of cardiovascular collapse)

Medication variable pde

nitrates

| METADATA ID                                                                              | METADATA Description                                                                                                                                                                                                                                          | METADATA                                                            | A Medication code                                                                             | B Diagnosis code       | RISK                           | CODE                    | NOTES                  | Limitations/Issues                                                                                           |
|------------------------------------------------------------------------------------------|---------------------------------------------------------------------------------------------------------------------------------------------------------------------------------------------------------------------------------------------------------------|---------------------------------------------------------------------|-----------------------------------------------------------------------------------------------|------------------------|--------------------------------|-------------------------|------------------------|--------------------------------------------------------------------------------------------------------------|
| C1. Long-term aspirin > 160 mg/day                                                       | Stop long-term aspirin at doses greater than 160mg per day                                                                                                                                                                                                    | ICD9 / CCS for ICD9<br>ICD10 / CCS for ICD10<br>Medication variable |                                                                                               |                        |                                |                         |                        | Omitted as very few people receiving prescribed aspirin                                                      |
| C2. Aspirin and PUD                                                                      | Stop aspirin with a past history of peptic ulcer disease without concurrent PPI                                                                                                                                                                               | ICD9 / CCS for ICD9<br>ICD10 / CCS for ICD10<br>Medication variable |                                                                                               |                        |                                |                         |                        | Omitted as very few people receiving prescribed aspirin                                                      |
| C3. Antiplatelets or anticoagulants with concurrent significant bleeding risk            | Aspirin, dipyridol, dipyridole, vitamin K antagonists, direct thrombin inhibitors or factor Xa inhibitors with concurrent significant bleeding risk, i.e. uncontrolled severe hypertension, bleeding diathesis, recent non-trivial spontaneous bleeding       | ICD9 / CCS for ICD9<br>ICD10 / CCS for ICD10<br>Medication variable | Antiploatelet agents, vitamin K antagonists, direct thrombin inhibitors, factor Xa inhibitors | Bleeding diathesis     | Recent GI bleeding             | Cerebral hemorrhage     |                        | 1. "Uncontrolled severe hypertension" not coded.<br>2. Diagnosis code present within 1 year of prescription. |
| C4. Aspirin and dipyridol as secondary stroke prevention                                 | Stop aspirin plus dipyridol as secondary stroke prevention, unless the patient has a coronary stent(s) inserted in the previous 12 months or concurrent acute coronary syndrome or has a high grade symptomatic carotid arterial stenosis                     | ICD9 / CCS for ICD9<br>ICD10 / CCS for ICD10<br>Medication variable |                                                                                               |                        |                                |                         |                        | Omitted as very few people receiving prescribed aspirin                                                      |
| C5. Aspirin & anticoagulant                                                              | Stop aspirin in combination with vitamin K antagonists, direct thrombin inhibitor or factor Xa inhibitors in patients with chronic atrial fibrillation (no added benefit from aspirin).                                                                       | ICD9 / CCS for ICD9<br>ICD10 / CCS for ICD10<br>Medication variable |                                                                                               |                        |                                |                         |                        | Omitted as very few people receiving prescribed aspirin                                                      |
| C6. Antiplatelets & anticoagulant                                                        | Stop antiplatelet agents with vitamin K antagonists, direct thrombin inhibitor or factor Xa inhibitors in patients with stable coronary, cerebrovascular or peripheral arterial disease (no added benefit from dual therapy)                                  | ICD9 / CCS for ICD9<br>ICD10 / CCS for ICD10<br>Medication variable | Antiplatelets                                                                                 | Anticoagulant          | Coronary implant (CABG or PCI) | Acute coronary syndrome |                        |                                                                                                              |
| C7. Ticlopidine                                                                          | Ticlopidine in any circumstances (dipyridol and prasugrel have similar efficacy, stronger evidence and fewer side-effects).                                                                                                                                   | ICD9 / CCS for ICD9<br>ICD10 / CCS for ICD10                        | Ticlopidine                                                                                   |                        |                                |                         |                        |                                                                                                              |
| C8. Anticoagulant for first EVT without continuing provoking risk factors for > 6 months | Stop vitamin K antagonist, direct thrombin inhibitor or factor Xa inhibitors for first deep venous thrombosis without continuing provoking risk factors (e.g. thrombophilia) for > 6 months, (no proven added benefit)                                        | ICD9 / CCS for ICD9<br>ICD10 / CCS for ICD10<br>Medication variable | Anticoagulants                                                                                | Deep venous thrombosis | Pulmonary embolus              | Atrial Fibrillation     | Mechanical heart valve |                                                                                                              |
| C9. Anticoagulant for first PE without continuing provoking risk factors for > 12 months | Stop vitamin K antagonist, direct thrombin inhibitor or factor Xa inhibitors for first pulmonary embolus without continuing provoking risk factors (e.g. thrombophilia) for > 12 months (no proven added benefit)                                             | ICD9 / CCS for ICD9<br>ICD10 / CCS for ICD10<br>Medication variable |                                                                                               |                        |                                |                         |                        | Omitted due to difficulty in operationalizing from claims data                                               |
| C10. NSAID and anticoagulant in combination                                              | Stop NSAID and vitamin K antagonist, direct thrombin inhibitor or factor Xa inhibitors in combination (risk of major gastrointestinal bleeding).                                                                                                              | ICD9 / CCS for ICD9<br>ICD10 / CCS for ICD10<br>Medication variable | Anticoagulants                                                                                | NSAID                  |                                |                         |                        | 1. nsaid medication variable includes all NSAIDs but excludes topicals                                       |
| C11. NSAID and antiplatelet agents without PPI prophylaxis                               | Stop NSAID with concurrent antiplatelet agents without PPI prophylaxis (increased risk of peptic ulcer disease)                                                                                                                                               | ICD9 / CCS for ICD9<br>ICD10 / CCS for ICD10<br>Medication variable | Antiplatelets                                                                                 | NSAID                  | PPI                            |                         |                        | Many people are likely getting PPIs over the counter                                                         |
| D1. TCAs & specific conditions                                                           | Stop tricyclic antidepressants (TCAs) with dementia, narrow angle glaucoma, cardiac conduction abnormalities, prostatic, or prior history of urinary retention (risk of worsening these conditions).                                                          | ICD9 / CCS for ICD9<br>ICD10 / CCS for ICD10<br>Medication variable | TCAs                                                                                          | Narrow angle glaucoma  |                                |                         |                        |                                                                                                              |
| D2. TCAs as first-line antidepressants                                                   | Stop initiation of Tricyclic Antidepressants (TCAs) as first-line antidepressant treatment (higher risk of adverse drug reactions with TCAs than with SSRIs or SNRIs).                                                                                        | ICD9 / CCS for ICD9<br>ICD10 / CCS for ICD10<br>Medication variable | TCAs                                                                                          | Depression             |                                |                         |                        | Omitted due to difficulty in defining first-line therapy                                                     |
| D3. Anticholinergic neuroleptics with history of BPH/urinary retention                   | Stop neuroleptics with moderate-to-marked anticholinergic effects (chlorpromazine, clozapine, flupenthixol, fluphenazine, pipothiazine, promazine, zuclopenthixol) with a history of prostatic or previous urinary retention (high risk of urinary retention) | ICD9 / CCS for ICD9<br>ICD10 / CCS for ICD10<br>Medication variable | Anticholinergic antipsychotics                                                                | BPH/urinary retention  |                                |                         |                        |                                                                                                              |
| D4. SSRIs with hyponatremia                                                              | Stop selective serotonin re-uptake inhibitors (SSRIs) with current or recent significant hyponatremia (risk of exacerbating or precipitating hyponatremia).                                                                                                   | ICD9 / CCS for ICD9<br>ICD10 / CCS for ICD10<br>Medication variable |                                                                                               |                        |                                |                         |                        | Omitted due to lack of information on sodium values                                                          |

| METADATA ID                                                    | METADATA Description                                                                                                                                                                                                                                                                                                                                                      | METADATA                                     | A Medication code                                                                    | B Diagnosis code                                            | RISK                 | CODE                                              | NOTES                                                                                                                                                                                                                                                                                                                                                                                                                                                                                                                                | Limitations/Issues                                                                                                                                                                  |
|----------------------------------------------------------------|---------------------------------------------------------------------------------------------------------------------------------------------------------------------------------------------------------------------------------------------------------------------------------------------------------------------------------------------------------------------------|----------------------------------------------|--------------------------------------------------------------------------------------|-------------------------------------------------------------|----------------------|---------------------------------------------------|--------------------------------------------------------------------------------------------------------------------------------------------------------------------------------------------------------------------------------------------------------------------------------------------------------------------------------------------------------------------------------------------------------------------------------------------------------------------------------------------------------------------------------------|-------------------------------------------------------------------------------------------------------------------------------------------------------------------------------------|
| D5. Benzodiazepines for >4 weeks                               | Stop benzodiazepines for >4 weeks (no indication for longer treatment; all benzodiazepines should be withdrawn gradually if taken for more than 4 weeks as there is a risk of causing a benzodiazepine withdrawal syndrome if stopped abruptly).                                                                                                                          | ICD9 / CCS for ICD9<br>ICD10 / CCS for ICD10 | Medication code<br>Benzodiazepines                                                   | Diagnosis code                                              |                      |                                                   | STOPP K1 is a broader category so this is excluded                                                                                                                                                                                                                                                                                                                                                                                                                                                                                   |                                                                                                                                                                                     |
| D6. Antipsychotics in parkinsonism/LBD                         | Stop antipsychotics (i.e. other than quetiapine or clozapine) in those with parkinsonism or Lewy Body Disease (risk of severe extra-pyramidal symptoms)                                                                                                                                                                                                                   | ICD9 / CCS for ICD9<br>ICD10 / CCS for ICD10 | A Medication code<br>Antipsychotics (except quetiapine, clozapine, and pimavanserin) | B Diagnosis code<br>Parkinson disease and Lewy body disease | A                    | A & B                                             |                                                                                                                                                                                                                                                                                                                                                                                                                                                                                                                                      |                                                                                                                                                                                     |
| D7. Anticholinergics to treat EPS                              | Stop anticholinergics/antimuscarinics to treat extra-pyramidal side-effects of neuroleptic medications (risk of anticholinergic toxicity).                                                                                                                                                                                                                                | ICD9 / CCS for ICD9<br>ICD10 / CCS for ICD10 | A Medication code<br>Anticholinergic medications to treat EPS (e.g., benztropine)    | B Diagnosis code<br>Antipsychotics                          |                      |                                                   | Omitted due to difficulty in determining reason for use of medications to treat EPS (and shows up in anticholinergic domain)                                                                                                                                                                                                                                                                                                                                                                                                         |                                                                                                                                                                                     |
| D8. Anticholinergics in dementia/delirium                      | Stop anticholinergics/antimuscarinics in patients with delirium or dementia (risk of exacerbation of cognitive impairment).                                                                                                                                                                                                                                               | ICD9 / CCS for ICD9<br>ICD10 / CCS for ICD10 | A Medication code<br>Anticholinergic medications from Beer's Table 7                 | B Diagnosis code                                            | A                    | A                                                 | 1. This criterion applies to all patients in the dementia cohort.<br>*Anticholinergics/antimuscarinics* overlaps with anticholinergic medications from Beer's Table 7                                                                                                                                                                                                                                                                                                                                                                |                                                                                                                                                                                     |
| D9. Antipsychotics in BPSD                                     | Stop neuroleptic antipsychotic in patients with behavioral and psychological symptoms of dementia (BPSD) unless symptoms are severe and other non-pharmacological treatments have failed (increased risk of stroke).                                                                                                                                                      | ICD9 / CCS for ICD9<br>ICD10 / CCS for ICD10 | A Medication code<br>Antipsychotics                                                  | B Diagnosis code<br>Schizophrenia                           |                      | A                                                 | ICD9 295 (Schizophrenic disorders), 297 (delusional disorders), 298 (other nonorganic psychoses), 301.2 (Shoivod personality disorder), OR CCS 5.10 (Schizophrenia and other psychotic disorders)<br>ICD9 296 (Episodic mood disorders) OR CCS 8.1 (Bipolar disorders)<br>ICD10 F20-F29 (Schizophrenia, schizotypal, and delusional disorders) OR CCS MB0001 (Schizophrenia spectrum and other psychotic disorders)<br>ICD10 F30-F31 (manic episode), F31 (Bipolar affective disorder) OR CCS MB0003 (Bipolar and related disorders) | 1. We exclude patients with diagnosis code for schizophrenic disorders/psychosis or bipolar disorder. 2. Medication definition includes all antipsychotics (1st and 2nd generation) |
| D10. Neuroleptics as hypnotics                                 | Stop neuroleptics as hypnotics, unless sleep disorder is due to psychosis or dementia (risk of confusion, hypotension, extra-pyramidal side-effects, falls).                                                                                                                                                                                                              | ICD9 / CCS for ICD9<br>ICD10 / CCS for ICD10 | A Medication code                                                                    | B Diagnosis code                                            |                      |                                                   | Omitted due to difficulty in operationalizing (and overlap with D9 given that entire cohort is patients with dementia)                                                                                                                                                                                                                                                                                                                                                                                                               |                                                                                                                                                                                     |
| D11. ChEIs with bradycardia/heart block                        | Stop acetylcholinesterase inhibitors with a known history of persistent bradycardia (<60 beats/min), heart block or recurrent unexplained syncope or concurrent treatment with drugs that reduce heart rate such as beta-blockers, digoxin, diltiazem, verapamil (risk of cardiac conduction failure, syncope and injury).                                                | ICD9 / CCS for ICD9<br>ICD10 / CCS for ICD10 | A Medication code<br>Cholinesterase inhibitors                                       | B Diagnosis code<br>Syncope                                 | 780.2<br>R55         | 427.8<br>I44.1, I44.2, I44.3, I45.5, I45.9, Q24.6 | 426.0, 426.10, 426.12, 426.13, 426.6, 426.9, 746.8                                                                                                                                                                                                                                                                                                                                                                                                                                                                                   | A<br>A & [B within 1 year   C within 1 year   D within 1 year   E pending prescription with A]                                                                                      |
| D12. Phenothiazines                                            | Stop phenothiazines as first-line treatment, since safer and more efficacious alternatives exist (phenothiazines are sedative, have significant anti-muscarinic toxicity in older people, with the exception of prochlorperazine for nausea/vomiting/vertigo, chlorpromazine for relief of persistent hiccoughs and levomepromazine as an anti-emetic in palliative care) | ICD9 / CCS for ICD9<br>ICD10 / CCS for ICD10 | A Medication code                                                                    | B Diagnosis code                                            |                      |                                                   | Omitted as this is covered in other criterion and due to difficulty in operationalizing first-line therapy                                                                                                                                                                                                                                                                                                                                                                                                                           |                                                                                                                                                                                     |
| D13. Levodopa or dopamine agonists for benign essential tremor | Stop levodopa or dopamine agonists for benign essential tremor (no evidence of efficacy)                                                                                                                                                                                                                                                                                  | ICD9 / CCS for ICD9<br>ICD10 / CCS for ICD10 | A Medication code<br>Levodopa & dopamine agonists                                    | B Diagnosis code<br>Benign essential tremor                 | 781.0, 333.1         | G20, G21, G22, G23, G31.83, G31.85                | 332, 333.0, 331.6, 331.82                                                                                                                                                                                                                                                                                                                                                                                                                                                                                                            | 1. Parkinson medication variables includes levodopa and dopamine agonists. 2. Exclude diagnosis of Parkinson disease, secondary Parkinsonism, Lewy body dementia, etc               |
| D14. First-generation antihistamines                           | Stop first-generation antihistamines (safer, less toxic antihistamines now widely available).                                                                                                                                                                                                                                                                             | ICD9 / CCS for ICD9<br>ICD10 / CCS for ICD10 | A Medication code<br>First generation antihistamines                                 | B Diagnosis code                                            |                      |                                                   |                                                                                                                                                                                                                                                                                                                                                                                                                                                                                                                                      |                                                                                                                                                                                     |
| E1. Digoxin at doses greater than 125 ug/day                   | Stop digoxin at a long-term dose greater than 125ug/day if eGFR < 30 ml/min/1.73m2 (risk of digoxin toxicity if plasma levels not measured).                                                                                                                                                                                                                              | ICD9 / CCS for ICD9<br>ICD10 / CCS for ICD10 | A Medication code<br>Digoxin                                                         | B Diagnosis code<br>CKD Stage 4 or higher                   | Calculated eGFR < 30 |                                                   | A at TDD greater than 125 ug/day<br>A (at TDD greater than 125 ug/day) & [B   C]                                                                                                                                                                                                                                                                                                                                                                                                                                                     |                                                                                                                                                                                     |
| E2. Direct thrombin inhibitors if eGFR < 30                    | Stop direct thrombin inhibitors (e.g. dabigatran) if eGFR < 30 ml/min/1.73m2 (risk of bleeding)                                                                                                                                                                                                                                                                           | ICD9 / CCS for ICD9<br>ICD10 / CCS for ICD10 | A Medication code<br>Direct thrombin inhibitors                                      | B Diagnosis code<br>CKD Stage 4 or higher                   | Calculated eGFR < 30 |                                                   | A<br>A & [B   C]                                                                                                                                                                                                                                                                                                                                                                                                                                                                                                                     |                                                                                                                                                                                     |

| ID                                                             | Description                                                                                                                                                                                                                                                           | Medication code                                                                                | Diagnosis code                                                                                                                          | Laboratory value                                                                                                                                                 |                            |       |                         |                    |                                                                                                   |
|----------------------------------------------------------------|-----------------------------------------------------------------------------------------------------------------------------------------------------------------------------------------------------------------------------------------------------------------------|------------------------------------------------------------------------------------------------|-----------------------------------------------------------------------------------------------------------------------------------------|------------------------------------------------------------------------------------------------------------------------------------------------------------------|----------------------------|-------|-------------------------|--------------------|---------------------------------------------------------------------------------------------------|
| E3. Factor Xa inhibitors if eGFR < 15                          | Stop Factor Xa inhibitors (e.g. rivaroxaban, apixaban) if eGFR < 15 ml/min/1.73m <sup>2</sup> (risk of bleeding)                                                                                                                                                      | ICD9 / CCS for ICD9<br>ICD10 / CCS for ICD10<br>Medication variable<br>factor_Xa               | Diagnosis code<br>CKD Stage 3 or higher<br>S85.5, S85.6<br>N18.5, N18.6                                                                 | Laboratory value<br>Cystatin C<br>Calculated eGFR < 15                                                                                                           |                            | A     |                         | A & (B   C)        |                                                                                                   |
| METADATA ID                                                    | METADATA Description                                                                                                                                                                                                                                                  | METADATA A Medication code                                                                     | METADATA B Diagnosis code                                                                                                               | METADATA C Laboratory value                                                                                                                                      | RISK                       | CODE  | NOTES                   | Limitations/Issues |                                                                                                   |
| E4. NSAIDs if eGFR < 50                                        | Stop NSAID's if eGFR < 50 ml/min/1.73m <sup>2</sup> (risk of deterioration in renal function).                                                                                                                                                                        | ICD9 / CCS for ICD9<br>ICD10 / CCS for ICD10<br>Medication variable<br>nsaid                   | Diagnosis code<br>CKD Stage 3 or higher<br>S85.5, S85.6<br>N18.3, N18.4, N18.5, N18.6                                                   | Laboratory value<br>Cystatin C<br>Calculated eGFR < 50                                                                                                           |                            | A     |                         | A & (B   C)        | 1. Using a definition of CKD Stage 3 or higher although technically CKD Stage 3 starts at eGFR 60 |
| METADATA ID                                                    | METADATA Description                                                                                                                                                                                                                                                  | METADATA A Medication code                                                                     | METADATA B Diagnosis code                                                                                                               | METADATA C Laboratory value                                                                                                                                      | RISK                       | CODE  | NOTES                   | Limitations/Issues |                                                                                                   |
| E5. Colchicine if eGFR < 10                                    | Stop colchicine if eGFR < 10 ml/min/1.73m <sup>2</sup> (risk of colchicine toxicity)                                                                                                                                                                                  | ICD9 / CCS for ICD9<br>ICD10 / CCS for ICD10<br>Medication variable<br>colchicine              | Diagnosis code<br>CKD Stage 4 or higher<br>S85.5, S85.6<br>N18.5, N18.6                                                                 | Laboratory value<br>Cystatin C<br>Calculated eGFR < 10                                                                                                           |                            | A     |                         | A & (B   C)        |                                                                                                   |
| METADATA ID                                                    | METADATA Description                                                                                                                                                                                                                                                  | METADATA A Medication code                                                                     | METADATA B Diagnosis code                                                                                                               | METADATA C Laboratory value                                                                                                                                      | RISK                       | CODE  | NOTES                   | Limitations/Issues |                                                                                                   |
| E6. Metformin if eGFR < 30                                     | Stop metformin if eGFR < 30 ml/min/1.73m <sup>2</sup> (risk of lactic acidosis)                                                                                                                                                                                       | ICD9 / CCS for ICD9<br>ICD10 / CCS for ICD10<br>Medication variable<br>metformin               | Diagnosis code<br>CKD Stage 4 or higher<br>S85.4, S85.5, S85.6<br>N18.4, N18.5, N18.6                                                   | Laboratory value<br>Cystatin C<br>Calculated eGFR < 30                                                                                                           |                            | A     |                         | A & (B   C)        |                                                                                                   |
| METADATA ID                                                    | METADATA Description                                                                                                                                                                                                                                                  | METADATA A Medication code                                                                     | METADATA B Diagnosis code                                                                                                               | METADATA C Laboratory value                                                                                                                                      | RISK                       | CODE  | NOTES                   | Limitations/Issues |                                                                                                   |
| F1. Prochlorperazine or metoclopramide with Parkinsonism       | Stop prochlorperazine or metoclopramide with Parkinsonism (risk of exacerbating Parkinsonian symptoms).                                                                                                                                                               | ICD9 / CCS for ICD9<br>ICD10 / CCS for ICD10<br>Medication variable<br>metoclopramide          | Diagnosis code<br>Parkinson disease or Lewy body disease<br>332, 333.0, 331.6, 331.82<br>G20, G21, G22, G23, G31.83,<br>G31.85          | Laboratory value<br>Cystatin C<br>A                                                                                                                              |                            |       | A & B                   |                    | 1. Metoclopramide medication code includes metoclopramide and prochlorperazine                    |
| METADATA ID                                                    | METADATA Description                                                                                                                                                                                                                                                  | METADATA A Medication code                                                                     | METADATA B Diagnosis code                                                                                                               | RISK                                                                                                                                                             | CODE                       | NOTES | Limitations/Issues      |                    |                                                                                                   |
| F2. PPIs at full dose                                          | Stop PPI for uncomplicated peptic ulcer disease or erosive peptic esophagitis at full therapeutic dosage for > 8 weeks (dose reduction or earlier discontinuation indicated).                                                                                         | ICD9 / CCS for ICD9<br>ICD10 / CCS for ICD10<br>Medication variable<br>ppi                     | Diagnosis code<br>High dose PPI                                                                                                         | Laboratory value<br>Cystatin C<br>A (>8 weeks or 60 days)                                                                                                        |                            |       | A (>8 weeks or 60 days) |                    |                                                                                                   |
| METADATA ID                                                    | METADATA Description                                                                                                                                                                                                                                                  | METADATA A Medication code                                                                     | METADATA B Diagnosis code                                                                                                               | RISK                                                                                                                                                             | CODE                       | NOTES | Limitations/Issues      |                    |                                                                                                   |
| F3. Drugs likely to cause constipation                         | Stop drugs likely to cause constipation (e.g. antimuscarinic/anticholinergic drugs, oral iron, opioids, verapamil, aluminum antacids) in patients with chronic constipation where non-constipating alternatives are available (risk of exacerbation of constipation). | ICD9 / CCS for ICD9<br>ICD10 / CCS for ICD10<br>Medication variable                            | Diagnosis code                                                                                                                          | Laboratory value<br>Cystatin C<br>Omitted due to difficulty in operationalizing                                                                                  |                            |       |                         |                    |                                                                                                   |
| METADATA ID                                                    | METADATA Description                                                                                                                                                                                                                                                  | METADATA A Medication code                                                                     | METADATA B Diagnosis code                                                                                                               | RISK                                                                                                                                                             | CODE                       | NOTES | Limitations/Issues      |                    |                                                                                                   |
| F4. High-dose iron                                             | Stop oral elemental iron doses greater than 200 mg daily (e.g. ferrous fumarate- 600 mg/day, ferrous sulphate > 600 mg/day, ferrous gluconate- 1800 mg/day; no evidence of enhanced iron absorption above these doses).                                               | ICD9 / CCS for ICD9<br>ICD10 / CCS for ICD10<br>Medication variable                            | Diagnosis code                                                                                                                          | Laboratory value<br>Cystatin C<br>Omitted due to rarity of people receiving prescription iron                                                                    |                            |       |                         |                    |                                                                                                   |
| METADATA ID                                                    | METADATA Description                                                                                                                                                                                                                                                  | METADATA A Medication code                                                                     | METADATA B Diagnosis code                                                                                                               | RISK                                                                                                                                                             | CODE                       | NOTES | Limitations/Issues      |                    |                                                                                                   |
| G1. Theophylline as monotherapy in COPD                        | Stop theophylline as monotherapy for COPD (safer, more effective alternative; risk of adverse effects due to narrow therapeutic index).                                                                                                                               | ICD9 / CCS for ICD9<br>ICD10 / CCS for ICD10<br>Medication variable<br>Theophylline            | Diagnosis code<br>Inhaled corticosteroids, antimuscarinic, beta-2-agonists                                                              | Laboratory value<br>Cystatin C<br>Omitted due to difficulty in operationalizing                                                                                  |                            |       |                         |                    |                                                                                                   |
| METADATA ID                                                    | METADATA Description                                                                                                                                                                                                                                                  | METADATA A Medication code                                                                     | METADATA B Diagnosis code                                                                                                               | RISK                                                                                                                                                             | CODE                       | NOTES | Limitations/Issues      |                    |                                                                                                   |
| G2. Systemic corticosteroids for COPD                          | Stop systemic corticosteroids instead of inhaled corticosteroids for maintenance therapy in moderate-severe COPD (unnecessary exposure to long-term side-effects of systemic corticosteroids and effective inhaled therapies are available)                           | ICD9 / CCS for ICD9<br>ICD10 / CCS for ICD10<br>Medication variable                            | Diagnosis code<br>Narrow angle glaucoma                                                                                                 | Laboratory value<br>Cystatin C<br>Omitted due to difficulty in operationalizing (definition of moderate/severe COPD, excluding alternative reasons for steroids) |                            |       |                         |                    |                                                                                                   |
| METADATA ID                                                    | METADATA Description                                                                                                                                                                                                                                                  | METADATA A Medication code                                                                     | METADATA B Diagnosis code                                                                                                               | METADATA C Diagnosis code                                                                                                                                        | RISK                       | CODE  | NOTES                   | Limitations/Issues |                                                                                                   |
| G3. Antimuscarinic bronchodilators with specific comorbidities | Stop anti-muscarinic bronchodilators (e.g. tiotropium, tiotropium) with a history of narrow angle glaucoma (may exacerbate glaucoma) or bladder outflow obstruction (may cause urinary retention).                                                                    | ICD9 / CCS for ICD9<br>ICD10 / CCS for ICD10<br>Medication variable<br>inhaled_anticholinergic | Diagnosis code<br>Narrow angle glaucoma<br>H40.2                                                                                        | Laboratory value<br>Cystatin C<br>BPH/urinary retention<br>600*, 788.2*                                                                                          |                            |       | N40, R33                | A                  | A & (B   C)                                                                                       |
| METADATA ID                                                    | METADATA Description                                                                                                                                                                                                                                                  | METADATA A Medication code                                                                     | METADATA B Diagnosis code                                                                                                               | RISK                                                                                                                                                             | CODE                       | NOTES | Limitations/Issues      |                    |                                                                                                   |
| G4. Benzo and acute/chronic respiratory failure                | Stop benzodiazepines with acute or chronic respiratory failure i.e. pO <sub>2</sub> < 8.0 kPa or pCO <sub>2</sub> > 8.5 kPa (risk of exacerbation of respiratory failure).                                                                                            | ICD9 / CCS for ICD9<br>ICD10 / CCS for ICD10<br>Medication variable                            | Diagnosis code                                                                                                                          | Laboratory value<br>Cystatin C<br>Omitted due to lack of information on respiratory failure                                                                      |                            |       |                         |                    |                                                                                                   |
| METADATA ID                                                    | METADATA Description                                                                                                                                                                                                                                                  | METADATA A Medication code                                                                     | METADATA B Diagnosis code                                                                                                               | METADATA C Medication code                                                                                                                                       | METADATA D Medication code | RISK  | CODE                    | NOTES              | Limitations/Issues                                                                                |
| H1. NSAIDs with GI issues unless PPI/H2 antagonist             | Stop non-steroidal anti-inflammatory drug (NSAID) other than COX-2 selective agents with history of peptic ulcer disease or gastrointestinal bleeding, unless with concurrent PPI or H2 antagonist (risk of peptic ulcer relapse).                                    | ICD9 / CCS for ICD9<br>ICD10 / CCS for ICD10<br>Medication variable<br>nsaid_3                 | Diagnosis code<br>History of PUD, GI bleeding<br>S30.2*, S31*, S32*, S33*, S34*, S37*<br>K22.1, K25, K26, K27, K28, K92.0, K92.1, K92.2 | Laboratory value<br>Cystatin C<br>PPI<br>H2 antagonist                                                                                                           |                            |       |                         | A                  | A & B & (C   D)                                                                                   |
| METADATA ID                                                    | METADATA Description                                                                                                                                                                                                                                                  | METADATA A Medication code                                                                     | METADATA B Diagnosis code                                                                                                               | RISK                                                                                                                                                             | CODE                       | NOTES | Limitations/Issues      |                    |                                                                                                   |
| H2. NSAID and severe hypertension/heart failure                | Stop NSAID with severe hypertension (risk of exacerbation of hypertension) or severe heart failure (risk of exacerbation of heart failure).                                                                                                                           | ICD9 / CCS for ICD9<br>ICD10 / CCS for ICD10<br>Medication variable                            | Diagnosis code                                                                                                                          | Laboratory value<br>Cystatin C<br>Omitted due to lack of information on severe hypertension/heart failure                                                        |                            |       |                         |                    |                                                                                                   |
| METADATA ID                                                    | METADATA Description                                                                                                                                                                                                                                                  | METADATA A Medication code                                                                     | METADATA B Diagnosis code                                                                                                               | RISK                                                                                                                                                             | CODE                       | NOTES | Limitations/Issues      |                    |                                                                                                   |
| H3. NSAIDs for OA where Tylenol has not been tried             | Stop Long-term use of NSAID (>3 months) for symptom relief of osteoarthritis pain where paracetamol has not been tried (simple analgesics preferable and usually as effective for pain relief)                                                                        | ICD9 / CCS for ICD9<br>ICD10 / CCS for ICD10<br>Medication variable                            | Diagnosis code                                                                                                                          | Laboratory value<br>Cystatin C<br>Omitted due to difficulty in operationalizing (many people receive Tylenol OTC)                                                |                            |       |                         |                    |                                                                                                   |
| METADATA ID                                                    | METADATA Description                                                                                                                                                                                                                                                  | METADATA A Medication code                                                                     | METADATA B Diagnosis code                                                                                                               | RISK                                                                                                                                                             | CODE                       | NOTES | Limitations/Issues      |                    |                                                                                                   |
| H4. Corticosteroids for RA                                     | Stop long-term corticosteroids (>3 months) as monotherapy for rheumatoid arthritis (risk of systemic corticosteroid side-effects).                                                                                                                                    | ICD9 / CCS for ICD9<br>ICD10 / CCS for ICD10<br>Medication variable                            | Diagnosis code                                                                                                                          | Laboratory value<br>Cystatin C<br>Omitted due to difficulty in operationalizing                                                                                  |                            |       |                         |                    |                                                                                                   |
| METADATA ID                                                    | METADATA Description                                                                                                                                                                                                                                                  | METADATA A Medication code                                                                     | METADATA B Diagnosis code                                                                                                               | RISK                                                                                                                                                             | CODE                       | NOTES | Limitations/Issues      |                    |                                                                                                   |

| METADATA ID                                                       | METADATA Description                                                                                                                                                                                                                                      | METADATA                                     | A Medication code  | B Medication code | C Medication code | RISK | CODE  | NOTES                     | Limitations/Issues                                                                                                                                                                     |
|-------------------------------------------------------------------|-----------------------------------------------------------------------------------------------------------------------------------------------------------------------------------------------------------------------------------------------------------|----------------------------------------------|--------------------|-------------------|-------------------|------|-------|---------------------------|----------------------------------------------------------------------------------------------------------------------------------------------------------------------------------------|
| H5. Corticosteroids for OA                                        | Stop corticosteroids (other than periodic intra-articular injections for mono-articular pain) for osteoarthritis (risk of systemic corticosteroid side-effects).                                                                                          | ICD9 / CCS for ICD9<br>ICD10 / CCS for ICD10 |                    |                   |                   |      |       |                           | Omitted due to difficulty in operationalizing (OA is very common; when looking at overlap between OA and corticosteroid, the use of corticosteroid is likely for another condition)    |
|                                                                   |                                                                                                                                                                                                                                                           | Medication variable                          |                    |                   |                   |      |       |                           |                                                                                                                                                                                        |
| H6. Long-term NSAID or colchicine for gout                        | Stop long-term NSAID or colchicine (>3 months) for chronic treatment of gout where there is no contraindication to a xanthine-oxidase inhibitor (e.g. allopurinol, febuxostat) (xanthine-oxidase inhibitors are first choice prophylactic drugs in gout). | ICD9 / CCS for ICD9<br>ICD10 / CCS for ICD10 |                    |                   |                   |      |       |                           | Omitted due to difficulty in operationalizing (even with diagnosis code for gout, NSAID could be for different indication; hard to tell if there is a contraindication to allopurinol) |
|                                                                   |                                                                                                                                                                                                                                                           | Medication variable                          |                    |                   |                   |      |       |                           |                                                                                                                                                                                        |
| H7. COX-2 selective NSAIDs with concurrent CV disease             | Stop COX-2 selective NSAIDs with concurrent cardiovascular disease (increased risk of myocardial infarction and stroke)                                                                                                                                   | ICD9 / CCS for ICD9<br>ICD10 / CCS for ICD10 |                    |                   |                   | A    |       | A & B                     |                                                                                                                                                                                        |
|                                                                   |                                                                                                                                                                                                                                                           | Medication variable                          | cox2               |                   |                   |      |       |                           |                                                                                                                                                                                        |
| H8. NSAID and corticosteroids without PPI prophylaxis             | Stop NSAID with concurrent corticosteroids without PPI prophylaxis (increased risk of peptic ulcer disease)                                                                                                                                               | ICD9 / CCS for ICD9<br>ICD10 / CCS for ICD10 |                    |                   |                   |      | A     | A & B & IC                | Many people may be getting PPIs over the counter                                                                                                                                       |
|                                                                   |                                                                                                                                                                                                                                                           | Medication variable                          | nsaid              | steroids          | ppi               |      |       |                           |                                                                                                                                                                                        |
| H9. Oral bisphosphonates with GI issues                           | Stop oral bisphosphonates in patients with a current or recent history of upper gastrointestinal disease i.e. dysphagia, esophagitis, gastritis, duodenitis, or peptic ulcer disease, or upper gastrointestinal bleeding                                  | ICD9 / CCS for ICD9<br>ICD10 / CCS for ICD10 |                    |                   |                   | A    |       | A & B within 1 year       |                                                                                                                                                                                        |
|                                                                   |                                                                                                                                                                                                                                                           | Medication variable                          | oral_biphosphonate |                   |                   |      |       |                           |                                                                                                                                                                                        |
| I1. Bladder antimuscarinics with certain conditions               | Stop antimuscarinic drugs with dementia, or chronic cognitive impairment (risk of increased confusion, agitation) or narrow-angle glaucoma (risk of acute exacerbation of glaucoma), or chronic prostatism (risk of urinary retention).                   | ICD9 / CCS for ICD9<br>ICD10 / CCS for ICD10 |                    |                   |                   |      |       |                           |                                                                                                                                                                                        |
|                                                                   |                                                                                                                                                                                                                                                           | Medication variable                          | antimuscarinics    |                   |                   |      |       |                           |                                                                                                                                                                                        |
| I2. Selective alpha-1 blockers in orthostatic hypotension/syncope | Stop selective alpha-1 blockers in those with symptomatic orthostatic hypotension or recurrent syncope (risk of precipitating recurrent syncope)                                                                                                          | ICD9 / CCS for ICD9<br>ICD10 / CCS for ICD10 |                    |                   |                   |      |       |                           | Omitted due to difficulty in operationalizing                                                                                                                                          |
|                                                                   |                                                                                                                                                                                                                                                           | Medication variable                          |                    |                   |                   |      |       |                           |                                                                                                                                                                                        |
| J1. Long-acting sulfonylureas                                     | Stop sulfonylureas with a long duration of action (e.g. glibenclamide, chlorpropamide, gliclazide) with type 2 diabetes mellitus                                                                                                                          | ICD9 / CCS for ICD9<br>ICD10 / CCS for ICD10 |                    |                   |                   | A    | A     | 1. Same as Beers criteria |                                                                                                                                                                                        |
|                                                                   |                                                                                                                                                                                                                                                           | Medication variable                          | sulfonylurea_LA    |                   |                   |      |       |                           |                                                                                                                                                                                        |
| J2. TZDs in heart failure                                         | Stop thiazolidenediones (e.g. rosiglitazone, pioglitazone) in patients with heart failure (risk of exacerbation of heart failure)                                                                                                                         | ICD9 / CCS for ICD9<br>ICD10 / CCS for ICD10 |                    |                   |                   | A    | A & B | 1. Same as Beers criteria |                                                                                                                                                                                        |
|                                                                   |                                                                                                                                                                                                                                                           | Medication variable                          | tzd                |                   |                   |      |       |                           |                                                                                                                                                                                        |
| J3. Beta-blockers with frequent hypoglycemic episodes             | Stop beta-blockers in diabetes mellitus with frequent hypoglycemic episodes (risk of suppressing hypoglycemic symptoms).                                                                                                                                  | ICD9 / CCS for ICD9<br>ICD10 / CCS for ICD10 |                    |                   |                   |      |       |                           | Omitted due to difficulty in operationalizing "frequent hypoglycemic episodes"                                                                                                         |
|                                                                   |                                                                                                                                                                                                                                                           | Medication variable                          |                    |                   |                   |      |       |                           |                                                                                                                                                                                        |
| J4. Estrogens with history of breast cancer or VTE                | Stop estrogens with a history of breast cancer or venous thromboembolism (increased risk of recurrence).                                                                                                                                                  | ICD9 / CCS for ICD9<br>ICD10 / CCS for ICD10 |                    |                   |                   |      |       | A                         | A & B   C                                                                                                                                                                              |
|                                                                   |                                                                                                                                                                                                                                                           | Medication variable                          | estrogens          |                   |                   |      |       |                           |                                                                                                                                                                                        |
| J5. Oral estrogens without progesterone                           | Stop oral estrogens without progesterone in patients with intact uterus (risk of endometrial cancer).                                                                                                                                                     | ICD9 / CCS for ICD9<br>ICD10 / CCS for ICD10 |                    |                   |                   |      |       |                           | Omitted due to unreliability in assessing whether participant has intact uterus based on ICD diagnosis code for hysterectomy alone                                                     |
|                                                                   |                                                                                                                                                                                                                                                           | Medication variable                          |                    |                   |                   |      |       |                           |                                                                                                                                                                                        |

|                                                                         |                                                                                                                                                                                                                                                                                 |                                              |                                          |                   |                  |                           |                                                                               |                                                                                     |                    |
|-------------------------------------------------------------------------|---------------------------------------------------------------------------------------------------------------------------------------------------------------------------------------------------------------------------------------------------------------------------------|----------------------------------------------|------------------------------------------|-------------------|------------------|---------------------------|-------------------------------------------------------------------------------|-------------------------------------------------------------------------------------|--------------------|
| J6. Androgens in absence of specific indication                         | Stop androgens (male sex hormones) in the absence of primary or secondary hypogonadism (risk of androgen toxicity; no proven benefit outside of the hypogonadism indication).                                                                                                   | ICD10 / CCS for ICD10                        | E29.1, E89.5, Q98.0, Q98.1, Q98.2, Q98.4 | A                 | A & B            | 1. Same as Beers criteria |                                                                               |                                                                                     |                    |
| METADATA ID                                                             | METADATA Description                                                                                                                                                                                                                                                            | METADATA                                     | METADATA                                 | A Medication code | B Diagnosis code | RISK                      | CODE                                                                          | NOTES                                                                               | Limitations/Issues |
| K1. Benzodiazepines                                                     | Stop benzodiazepines (sedative, may cause reduced sensorium, impair balance).                                                                                                                                                                                                   | ICD9 / CCS for ICD9<br>ICD10 / CCS for ICD10 | benzo                                    |                   |                  | A                         | A                                                                             | 1. Same as sedative-hypnotics benzo variable                                        |                    |
| METADATA ID                                                             | METADATA Description                                                                                                                                                                                                                                                            | METADATA                                     | A Medication code                        | B Diagnosis code  | RISK             | CODE                      | NOTES                                                                         | Limitations/Issues                                                                  |                    |
| K2. Antipsychotics                                                      | Stop neuroleptic drugs (may cause gait dyspraxia, Parkinsonism).                                                                                                                                                                                                                | ICD9 / CCS for ICD9<br>ICD10 / CCS for ICD10 |                                          |                   |                  |                           |                                                                               | Omitted as this category is covered in D9 (dementia with BPSD symptoms)             |                    |
| METADATA ID                                                             | METADATA Description                                                                                                                                                                                                                                                            | METADATA                                     | A Medication code                        | B Diagnosis code  | RISK             | CODE                      | NOTES                                                                         | Limitations/Issues                                                                  |                    |
| K3. Vasodilator drugs                                                   | Stop vasodilator drugs (e.g. alpha-1 receptor blockers, calcium channel blockers, long-acting nitrates, ACE inhibitors, angiotensin I receptor blockers, ) with persistent postural hypotension i.e. recurrent drop in systolic blood pressure >20mmHg (risk of syncope, falls) | ICD9 / CCS for ICD9<br>ICD10 / CCS for ICD10 |                                          |                   |                  |                           |                                                                               | Omitted due to difficulty in operationalizing                                       |                    |
| METADATA ID                                                             | METADATA Description                                                                                                                                                                                                                                                            | METADATA                                     | A Medication code                        | B Diagnosis code  | RISK             | CODE                      | NOTES                                                                         | Limitations/Issues                                                                  |                    |
| K4. Hypnotic Z-drugs                                                    | Stop hypnotic Z-drugs e.g. zopiclone, zolpidem, zaleplon (may cause protracted daytime sedation, ataxia).                                                                                                                                                                       | ICD9 / CCS for ICD9<br>ICD10 / CCS for ICD10 | z_drug                                   |                   |                  | A                         | A                                                                             | 1. Same as Beers criteria variable                                                  |                    |
| METADATA ID                                                             | METADATA Description                                                                                                                                                                                                                                                            | METADATA                                     | A Medication code                        | B Diagnosis code  | RISK             | CODE                      | NOTES                                                                         | Limitations/Issues                                                                  |                    |
| L1. Opioids                                                             | Stop use of oral or transdermal strong opioids (morphine, oxycodone, fentanyl, buprenorphine, diamorphine, methadone, tramadol, pethidine, pentazocine) as first line therapy for mild pain (WHO analgesic ladder not observed).                                                | ICD9 / CCS for ICD9<br>ICD10 / CCS for ICD10 |                                          |                   |                  |                           |                                                                               | Omitted due to difficulty in operationalizing first-line therapy                    |                    |
| METADATA ID                                                             | METADATA Description                                                                                                                                                                                                                                                            | METADATA                                     | A Medication code                        | B Diagnosis code  | RISK             | CODE                      | NOTES                                                                         | Limitations/Issues                                                                  |                    |
| L2. Opioids without laxative                                            | Stop use of regular (as distinct from PRN) opioids without concomitant laxative (risk of severe constipation).                                                                                                                                                                  | ICD9 / CCS for ICD9<br>ICD10 / CCS for ICD10 |                                          |                   |                  |                           |                                                                               | Omitted due to difficulty in operationalizing as many people receives laxatives OTC |                    |
| METADATA ID                                                             | METADATA Description                                                                                                                                                                                                                                                            | METADATA                                     | A Medication code                        | B Diagnosis code  | RISK             | CODE                      | NOTES                                                                         | Limitations/Issues                                                                  |                    |
| M. Concomitant use of two or more drugs with anticholinergic properties | Stop concomitant use of two or more drugs with antimuscarinic/anticholinergic properties                                                                                                                                                                                        | ICD9 / CCS for ICD9<br>ICD10 / CCS for ICD10 | anticholinergics_table_7                 |                   |                  | A & A                     | A & A (overlapping prescriptions for 2 drugs with anticholinergic properties) |                                                                                     |                    |

2019 Beers criteria

Criteria taken from American Geriatrics Society 2019 Updated AGS Beers Criteria for Potentially Inappropriate Medication Use in Older Adults

| METADATA ID | METADATA Description                                                  | METADATA                                                                                                          | A Medication code                                                                                           | B Diagnosis code                                                                                           | RISK                                                                                                                                                                                                                                                                                                                                                                                                                                                       | CODE | NOTES                                                                                                          | Limitations/Issues                                                                                                                                                                                                         |
|-------------|-----------------------------------------------------------------------|-------------------------------------------------------------------------------------------------------------------|-------------------------------------------------------------------------------------------------------------|------------------------------------------------------------------------------------------------------------|------------------------------------------------------------------------------------------------------------------------------------------------------------------------------------------------------------------------------------------------------------------------------------------------------------------------------------------------------------------------------------------------------------------------------------------------------------|------|----------------------------------------------------------------------------------------------------------------|----------------------------------------------------------------------------------------------------------------------------------------------------------------------------------------------------------------------------|
|             |                                                                       |                                                                                                                   | A Medication code<br>F18 generation antipsychotics                                                          | B Diagnosis code                                                                                           | RISK                                                                                                                                                                                                                                                                                                                                                                                                                                                       | CODE | NOTES                                                                                                          | Limitations/Issues                                                                                                                                                                                                         |
|             | First generation antipsychotics                                       | IC99 / CCS for K20<br>K210 / CCS for K210<br>Medication variable<br>first_gen_antipsychotics_beers                |                                                                                                             |                                                                                                            | A                                                                                                                                                                                                                                                                                                                                                                                                                                                          | A    |                                                                                                                |                                                                                                                                                                                                                            |
|             |                                                                       |                                                                                                                   | A Medication code<br>Antiparkinson Anticholinergics                                                         | B Diagnosis code                                                                                           | RISK                                                                                                                                                                                                                                                                                                                                                                                                                                                       | CODE | NOTES                                                                                                          | Limitations/Issues                                                                                                                                                                                                         |
|             | Antiparkinson agents                                                  | IC99 / CCS for K20<br>K210 / CCS for K210<br>Medication variable<br>ac_park                                       |                                                                                                             |                                                                                                            | A                                                                                                                                                                                                                                                                                                                                                                                                                                                          | A    |                                                                                                                |                                                                                                                                                                                                                            |
|             |                                                                       |                                                                                                                   | A Medication code<br>Antiepileptics                                                                         | B Diagnosis code                                                                                           | RISK                                                                                                                                                                                                                                                                                                                                                                                                                                                       | CODE | NOTES                                                                                                          | Limitations/Issues                                                                                                                                                                                                         |
|             | Antiepileptics                                                        | IC99 / CCS for K20<br>K210 / CCS for K210<br>Medication variable<br>antiepileptics_beers                          |                                                                                                             |                                                                                                            | A                                                                                                                                                                                                                                                                                                                                                                                                                                                          | A    |                                                                                                                |                                                                                                                                                                                                                            |
|             |                                                                       |                                                                                                                   | A Medication code<br>Dipyrindole                                                                            | B Diagnosis code                                                                                           | RISK                                                                                                                                                                                                                                                                                                                                                                                                                                                       | CODE | NOTES                                                                                                          | Limitations/Issues                                                                                                                                                                                                         |
|             | Dipyrindole, oral short-acting                                        | IC99 / CCS for K20<br>K210 / CCS for K210<br>Medication variable<br>dipyrindole                                   |                                                                                                             |                                                                                                            | A                                                                                                                                                                                                                                                                                                                                                                                                                                                          | A    | 1. Excludes aspirin-dipyrindole combination                                                                    |                                                                                                                                                                                                                            |
|             |                                                                       |                                                                                                                   | A Medication code<br>Drostanolone                                                                           | B Diagnosis code<br>C Laboratory value<br>Cystatin C                                                       | RISK                                                                                                                                                                                                                                                                                                                                                                                                                                                       | CODE | NOTES                                                                                                          | Limitations/Issues                                                                                                                                                                                                         |
|             | Nitrofurantoin                                                        | IC99 / CCS for K20<br>K210 / CCS for K210<br>Medication variable<br>nitrofurantoin                                |                                                                                                             |                                                                                                            | Calculated eGFR < 30                                                                                                                                                                                                                                                                                                                                                                                                                                       | A    | (A & B   C)   (A & Bx supply > 30)                                                                             | 2. Criterion will apply to two different scenarios (first, in those who are on nitrofurantoin and have eGFR < 30; second, in those who are on long-term suppression defined as number of pills > 30 over a 3 month period) |
|             |                                                                       |                                                                                                                   | A Medication code<br>Alpha 2 blockers                                                                       | B Diagnosis code<br>D Diagnosis code<br>E Diagnosis code                                                   | RISK                                                                                                                                                                                                                                                                                                                                                                                                                                                       | CODE | NOTES                                                                                                          | Limitations/Issues                                                                                                                                                                                                         |
|             | Peripheral alpha-2 blockers for treatment of hypertension             | IC99 / CCS for K20<br>K210 / CCS for K210<br>Medication variable<br>alpha_2_blockers                              |                                                                                                             |                                                                                                            | CS 10.2.1 (Hypertension of prostate) and CS 10.1.8 (Gonorrheal symptoms and ill-defined conditions)<br>IC99 309* (adjustment reaction - includes PTSD and others)<br>CS GEN012 (Hypertension of prostate) and CS GEN008 (benzoyl insecticides)<br>CS M8007 (trauma- and stress-related disorders) or IC924 F43 (reaction to severe stress, and adjustment disorder)                                                                                        | A    | A & (B   C)                                                                                                    | 1. Alpha-2 blockers are indicated for other conditions (e.g., PHN/LTIs) which we try to exclude                                                                                                                            |
|             |                                                                       |                                                                                                                   | A Medication code<br>CS alpha agonists (guanfacine, guanfacine, methylphen, norepinephrine > 0.2 mg/kg/day) | B Diagnosis code                                                                                           | RISK                                                                                                                                                                                                                                                                                                                                                                                                                                                       | CODE | NOTES                                                                                                          | Limitations/Issues                                                                                                                                                                                                         |
|             | Central alpha-agonists                                                | IC99 / CCS for K20<br>K210 / CCS for K210<br>Medication variable<br>cns_alpha_agonists                            |                                                                                                             |                                                                                                            | A                                                                                                                                                                                                                                                                                                                                                                                                                                                          | A    | 1. "Avoid clonidine for first-line treatment" was not taken into account due to difficulty in operationalizing |                                                                                                                                                                                                                            |
|             |                                                                       |                                                                                                                   | A Medication code<br>Disopyramide                                                                           | B Diagnosis code                                                                                           | RISK                                                                                                                                                                                                                                                                                                                                                                                                                                                       | CODE | NOTES                                                                                                          | Limitations/Issues                                                                                                                                                                                                         |
|             | Disopyramide                                                          | IC99 / CCS for K20<br>K210 / CCS for K210<br>Medication variable<br>disopyramide                                  |                                                                                                             |                                                                                                            | A                                                                                                                                                                                                                                                                                                                                                                                                                                                          | A    |                                                                                                                |                                                                                                                                                                                                                            |
|             |                                                                       |                                                                                                                   | A Medication code<br>Dronedronone                                                                           | B Diagnosis code                                                                                           | RISK                                                                                                                                                                                                                                                                                                                                                                                                                                                       | CODE | NOTES                                                                                                          | Limitations/Issues                                                                                                                                                                                                         |
|             | Dronedronone                                                          | IC99 / CCS for K20<br>K210 / CCS for K210<br>Medication variable<br>dronedronone                                  |                                                                                                             |                                                                                                            |                                                                                                                                                                                                                                                                                                                                                                                                                                                            |      | Omitted due to rarity of use and not included in Med-Span classification                                       |                                                                                                                                                                                                                            |
|             |                                                                       |                                                                                                                   | A Medication code<br>Digoxin                                                                                | B Diagnosis code<br>C Laboratory value<br>GFR (eGFR)                                                       | RISK                                                                                                                                                                                                                                                                                                                                                                                                                                                       | CODE | NOTES                                                                                                          | Limitations/Issues                                                                                                                                                                                                         |
|             | Digoxin for first-line therapy for AF or heart failure                | IC99 / CCS for K20<br>K210 / CCS for K210<br>Medication variable<br>digoxin                                       |                                                                                                             |                                                                                                            |                                                                                                                                                                                                                                                                                                                                                                                                                                                            |      | Omitted due to difficulty in operationalizing                                                                  |                                                                                                                                                                                                                            |
|             |                                                                       |                                                                                                                   | A Medication code<br>Nifedipine, immediate release                                                          | B Diagnosis code                                                                                           | RISK                                                                                                                                                                                                                                                                                                                                                                                                                                                       | CODE | NOTES                                                                                                          | Limitations/Issues                                                                                                                                                                                                         |
|             | Nifedipine, immediate release                                         | IC99 / CCS for K20<br>K210 / CCS for K210<br>Medication variable<br>nifedipine                                    |                                                                                                             |                                                                                                            | A                                                                                                                                                                                                                                                                                                                                                                                                                                                          | A    | 1. Medication definition excludes ER formulations                                                              |                                                                                                                                                                                                                            |
|             |                                                                       |                                                                                                                   | A Medication code<br>Amiodarone                                                                             | B Diagnosis code                                                                                           | RISK                                                                                                                                                                                                                                                                                                                                                                                                                                                       | CODE | NOTES                                                                                                          | Limitations/Issues                                                                                                                                                                                                         |
|             | Amiodarone                                                            | IC99 / CCS for K20<br>K210 / CCS for K210<br>Medication variable<br>amiodarone                                    |                                                                                                             |                                                                                                            |                                                                                                                                                                                                                                                                                                                                                                                                                                                            |      | Omitted due to difficulty in operationalizing                                                                  |                                                                                                                                                                                                                            |
|             |                                                                       |                                                                                                                   | A Medication code<br>Antidepressants                                                                        | B Diagnosis code<br>C Diagnosis code<br>D Medication code<br>Antiemetic (Prochlorperazine or Promethazine) | RISK                                                                                                                                                                                                                                                                                                                                                                                                                                                       | CODE | NOTES                                                                                                          | Limitations/Issues                                                                                                                                                                                                         |
|             | Antidepressants                                                       | IC99 / CCS for K20<br>K210 / CCS for K210<br>Medication variable<br>antidepressants_AC                            |                                                                                                             |                                                                                                            | A                                                                                                                                                                                                                                                                                                                                                                                                                                                          | A    | Same variable as the strong anticholinergic antidepressants                                                    |                                                                                                                                                                                                                            |
|             |                                                                       |                                                                                                                   | A Medication code<br>Antipsychotics (2nd and 3rd gen)                                                       | B Diagnosis code<br>C Diagnosis code<br>D Medication code<br>Antiemetic (Prochlorperazine or Promethazine) | RISK                                                                                                                                                                                                                                                                                                                                                                                                                                                       | CODE | NOTES                                                                                                          | Limitations/Issues                                                                                                                                                                                                         |
|             | Antipsychotics, first generation and second (atypical) generation     | IC99 / CCS for K20<br>K210 / CCS for K210<br>Medication variable<br>antipsychotics_1st_gen_antipsychotics_2nd_gen |                                                                                                             |                                                                                                            | IC99 295 (Schizophrenic disorders), 307 (delusional disorders), 298 (other nonorganic psychoses), 302.2 (Disordered personality disorders) OR CS 5.10 (Schizophrenia and other psychotic disorders)<br>IC99 F20-F29 (Schizophrenia, schizotypal, and delusional disorders) OR CS M8001 (Schizophrenia spectrum and other psychotic disorders)<br>IC99 F30 (Bipolar episodes), F31 (Bipolar affective disorder) OR CS M8002 (Bipolar and related disorders) | A    | A & (B   C)   (D & Bx supply > 30)                                                                             | 1. Very difficult to operationalize "short-term use as antiemetic during chemotherapy". We exclude prescriptions < 30 days for prochlorperazine/promethazine.                                                              |
|             |                                                                       |                                                                                                                   | A Medication code<br>Barbiturates                                                                           | B Diagnosis code                                                                                           | RISK                                                                                                                                                                                                                                                                                                                                                                                                                                                       | CODE | NOTES                                                                                                          | Limitations/Issues                                                                                                                                                                                                         |
|             | Barbiturates                                                          | IC99 / CCS for K20<br>K210 / CCS for K210<br>Medication variable<br>barbiturates                                  |                                                                                                             |                                                                                                            | A                                                                                                                                                                                                                                                                                                                                                                                                                                                          | A    |                                                                                                                |                                                                                                                                                                                                                            |
|             |                                                                       |                                                                                                                   | A Medication code<br>Benzodiazepines                                                                        | B Diagnosis code                                                                                           | RISK                                                                                                                                                                                                                                                                                                                                                                                                                                                       | CODE | NOTES                                                                                                          | Limitations/Issues                                                                                                                                                                                                         |
|             | Benzodiazepines                                                       | IC99 / CCS for K20<br>K210 / CCS for K210<br>Medication variable<br>benzo                                         |                                                                                                             |                                                                                                            | A                                                                                                                                                                                                                                                                                                                                                                                                                                                          | A    | Same variable as the sedative hypnotics variable                                                               |                                                                                                                                                                                                                            |
|             |                                                                       |                                                                                                                   | A Medication code<br>Meprobamate                                                                            | B Diagnosis code                                                                                           | RISK                                                                                                                                                                                                                                                                                                                                                                                                                                                       | CODE | NOTES                                                                                                          | Limitations/Issues                                                                                                                                                                                                         |
|             | Meprobamate                                                           | IC99 / CCS for K20<br>K210 / CCS for K210<br>Medication variable<br>meprobamate                                   |                                                                                                             |                                                                                                            | A                                                                                                                                                                                                                                                                                                                                                                                                                                                          | A    |                                                                                                                |                                                                                                                                                                                                                            |
|             |                                                                       |                                                                                                                   | A Medication code<br>Nonbenzodiazepine benzodiazepine receptor agonist hypnotics (Z-drugs)                  | B Diagnosis code                                                                                           | RISK                                                                                                                                                                                                                                                                                                                                                                                                                                                       | CODE | NOTES                                                                                                          | Limitations/Issues                                                                                                                                                                                                         |
|             | Nonbenzodiazepine benzodiazepine receptor agonist hypnotics (Z-drugs) | IC99 / CCS for K20<br>K210 / CCS for K210<br>Medication variable<br>z_drug                                        |                                                                                                             |                                                                                                            | A                                                                                                                                                                                                                                                                                                                                                                                                                                                          | A    |                                                                                                                |                                                                                                                                                                                                                            |
|             |                                                                       |                                                                                                                   | A Medication code<br>Ergolid mesylates, norepinephrine                                                      | B Diagnosis code                                                                                           | RISK                                                                                                                                                                                                                                                                                                                                                                                                                                                       | CODE | NOTES                                                                                                          | Limitations/Issues                                                                                                                                                                                                         |
|             | Ergolid mesylates, norepinephrine                                     | IC99 / CCS for K20<br>K210 / CCS for K210<br>Medication variable<br>ergolid_mesylates_norepinephrine              |                                                                                                             |                                                                                                            | A                                                                                                                                                                                                                                                                                                                                                                                                                                                          | A    |                                                                                                                |                                                                                                                                                                                                                            |
|             |                                                                       |                                                                                                                   | A Medication code<br>Testosterone                                                                           | B Diagnosis code                                                                                           | RISK                                                                                                                                                                                                                                                                                                                                                                                                                                                       | CODE | NOTES                                                                                                          | Limitations/Issues                                                                                                                                                                                                         |
|             | Androgens                                                             | IC99 / CCS for K20<br>K210 / CCS for K210<br>Medication variable<br>androgens                                     |                                                                                                             |                                                                                                            | IC99 257.1, 257.2, 758.7<br>IC99 E28.1, E28.5, E28.6, E28.7, E28.8, E28.9, E28.4                                                                                                                                                                                                                                                                                                                                                                           | A    | A & B                                                                                                          | 1. Not able to operationalize "with clinical symptoms"                                                                                                                                                                     |

| ID          | Description                             | Medication code                                                                                                                                                                                                                                                        | Diagnosis code | RISK | CODE | NOTES | Limitations/Issues                                                                                                                                                                    |
|-------------|-----------------------------------------|------------------------------------------------------------------------------------------------------------------------------------------------------------------------------------------------------------------------------------------------------------------------|----------------|------|------|-------|---------------------------------------------------------------------------------------------------------------------------------------------------------------------------------------|
|             | Deceased thyroid                        | K09 / CCS for K09<br>K010 / CCS for K010<br>Medication variable<br>deceased_thyroid                                                                                                                                                                                    | A              | B    | RISK | CODE  | NOTES<br>1. Defined based on Thyroid (Post), Thyroid (Pre), and Thyroid (Long) tables                                                                                                 |
| METADATA ID | METADATA Description                    | METADATA                                                                                                                                                                                                                                                               | A              | B    | RISK | CODE  | NOTES<br>Limitations/Issues                                                                                                                                                           |
|             | Estrogens with or without progestin     | K09 / CCS for K09<br>K010 / CCS for K010<br>Medication variable<br>estrogens                                                                                                                                                                                           | A              | B    | RISK | CODE  | NOTES<br>1. Estrogen medication variable definition excludes vaginal cream/tablets                                                                                                    |
| METADATA ID | METADATA Description                    | METADATA                                                                                                                                                                                                                                                               | A              | B    | RISK | CODE  | NOTES<br>Limitations/Issues                                                                                                                                                           |
|             | Growth hormone                          | 25.2 (panhypop), 25.3 (pituitary dwarfism), 25.4 (other anterior pituitary disorder), 25.7 (hypogonadotropic hypopituitarism), 25.8 (other disorders), 25.9 (simplectic disorder)<br>K09 / CCS for K09<br>K010 / CCS for K010<br>Medication variable<br>growth_hormone | A              | B    | RISK | CODE  | NOTES<br>1. Not able to confirm that diagnosis of GH deficiency was well established                                                                                                  |
| METADATA ID | METADATA Description                    | METADATA                                                                                                                                                                                                                                                               | A              | B    | RISK | CODE  | NOTES<br>Limitations/Issues                                                                                                                                                           |
|             | Insulin, sliding scale                  | K09 / CCS for K09<br>K010 / CCS for K010<br>Medication variable<br>insulin_sliding_scale                                                                                                                                                                               | A              | B    | RISK | CODE  | NOTES<br>1. Defined as not able to determine if participant is receiving sliding scale insulin                                                                                        |
| METADATA ID | METADATA Description                    | METADATA                                                                                                                                                                                                                                                               | A              | B    | RISK | CODE  | NOTES<br>Limitations/Issues                                                                                                                                                           |
|             | Megestrol                               | K09 / CCS for K09<br>K010 / CCS for K010<br>Medication variable<br>megestrol                                                                                                                                                                                           | A              | B    | RISK | CODE  | NOTES<br>Limitations/Issues                                                                                                                                                           |
| METADATA ID | METADATA Description                    | METADATA                                                                                                                                                                                                                                                               | A              | B    | RISK | CODE  | NOTES<br>Limitations/Issues                                                                                                                                                           |
|             | Long-acting sulfonureas                 | K09 / CCS for K09<br>K010 / CCS for K010<br>Medication variable<br>sulfonureas_LA                                                                                                                                                                                      | A              | B    | RISK | CODE  | NOTES<br>Limitations/Issues                                                                                                                                                           |
| METADATA ID | METADATA Description                    | METADATA                                                                                                                                                                                                                                                               | A              | B    | RISK | CODE  | NOTES<br>Limitations/Issues                                                                                                                                                           |
|             | Metoprolamide                           | K09 / CCS for K09<br>K010 / CCS for K010<br>Medication variable<br>metoprolamide_beta                                                                                                                                                                                  | A              | B    | RISK | CODE  | NOTES<br>1. Only factor in metoprolamide use is absence of gastroparesis diagnosis, the rest factor in duration of use not to exceed 12 weeks* due to difficulty in determining this. |
| METADATA ID | METADATA Description                    | METADATA                                                                                                                                                                                                                                                               | A              | B    | RISK | CODE  | NOTES<br>Limitations/Issues                                                                                                                                                           |
|             | Mineral oil, oral                       | K09 / CCS for K09<br>K010 / CCS for K010<br>Medication variable<br>mineral_oil                                                                                                                                                                                         | A              | B    | RISK | CODE  | NOTES<br>1. Defined as not operationalizing                                                                                                                                           |
| METADATA ID | METADATA Description                    | METADATA                                                                                                                                                                                                                                                               | A              | B    | RISK | CODE  | NOTES<br>Limitations/Issues                                                                                                                                                           |
|             | PPY                                     | K09 / CCS for K09<br>K010 / CCS for K010<br>Medication variable<br>ppp                                                                                                                                                                                                 | A              | B    | RISK | CODE  | NOTES<br>Limitations/Issues                                                                                                                                                           |
|             | Meperidine                              | K09 / CCS for K09<br>K010 / CCS for K010<br>Medication variable<br>meperidine                                                                                                                                                                                          | A              | B    | RISK | CODE  | NOTES<br>Limitations/Issues                                                                                                                                                           |
|             | Non-COX selective NSAIDs                | K09 / CCS for K09<br>K010 / CCS for K010<br>Medication variable<br>nsaid_2                                                                                                                                                                                             | A              | B    | RISK | CODE  | NOTES<br>Limitations/Issues                                                                                                                                                           |
|             | Indomethacin, ketorolac                 | K09 / CCS for K09<br>K010 / CCS for K010<br>Medication variable<br>indomethacin_and_ketorolac                                                                                                                                                                          | A              | B    | RISK | CODE  | NOTES<br>Limitations/Issues                                                                                                                                                           |
|             | Skeletal muscle relaxants               | K09 / CCS for K09<br>K010 / CCS for K010<br>Medication variable<br>muscle_2                                                                                                                                                                                            | A              | B    | RISK | CODE  | NOTES<br>Limitations/Issues                                                                                                                                                           |
|             | Desmopressin                            | K09 / CCS for K09<br>K010 / CCS for K010<br>Medication variable<br>desmopressin                                                                                                                                                                                        | A              | B    | RISK | CODE  | NOTES<br>Limitations/Issues                                                                                                                                                           |
|             | Clofazimine in heart failure            | K09 / CCS for K09<br>K010 / CCS for K010<br>Medication variable<br>clofazimine                                                                                                                                                                                         | A              | B    | RISK | CODE  | NOTES<br>Limitations/Issues                                                                                                                                                           |
|             | Nonhydroxydione CCBs in HF/HFpEF        | K09 / CCS for K09<br>K010 / CCS for K010<br>Medication variable<br>nonhydroxydione_ccb                                                                                                                                                                                 | A              | B    | RISK | CODE  | NOTES<br>Limitations/Issues                                                                                                                                                           |
|             | NSAIDs and COX-2 inhibitors in HF/HFpEF | K09 / CCS for K09<br>K010 / CCS for K010<br>Medication variable<br>nsaid                                                                                                                                                                                               | A              | B    | RISK | CODE  | NOTES<br>Limitations/Issues                                                                                                                                                           |
|             | TDZs in HF/HFpEF                        | K09 / CCS for K09<br>K010 / CCS for K010<br>Medication variable<br>tdz                                                                                                                                                                                                 | A              | B    | RISK | CODE  | NOTES<br>Limitations/Issues                                                                                                                                                           |
|             | Dorzolamide in HF/HFpEF                 | K09 / CCS for K09<br>K010 / CCS for K010<br>Medication variable<br>dorzolamide                                                                                                                                                                                         | A              | B    | RISK | CODE  | NOTES<br>Limitations/Issues                                                                                                                                                           |
|             | Chyloesterase inhibitors                | K09 / CCS for K09<br>K010 / CCS for K010<br>Medication variable<br>chyloesterase_inhibitors                                                                                                                                                                            | A              | B    | RISK | CODE  | NOTES<br>Limitations/Issues                                                                                                                                                           |

1. Definition attempts to capture those on long-term PPI without an indication, the exclude a number of conditions such as esophagitis, GI ulcers, Barrett's esophagus, concurrent use of anticoagulation/NSAID. We do not exclude diagnosis codes for uncomplicated gastroesophageal reflux disease. The definition of PPI excludes PPI/NSAID combination, PPI/aspirin combination, and PPI/iron treatment combination.

A & Continuous duration > 8 weeks (90 days)

A & Duration > 8 weeks & [B] | [C] (overlapping prescription) | [E] (overlapping prescription)

Might not capture all people who have legitimate reason for long-term PPI Use

K20 (esophagitis), K21.0 (GERD with esophagitis), K21.1 (reflux of esophagus), K22.7 (Barrett's esophagus), K23 (gastric ulcer), K26 (duodenal ulcer), K27 (gastric ulcer), K28 (gastric ulcer), K30 (gastritis and duodenitis), K31 (other diseases of stomach and duodenum), K32 (other diseases of digestive system, includes GI hemorrhage), K55.4 (increased secretion of gastric)

K20 (esophagitis), K21.0 (GERD with esophagitis), K21.1 (reflux of esophagus), K22.7 (Barrett's esophagus), K23 (gastric ulcer), K26 (duodenal ulcer), K27 (gastric ulcer), K28 (gastric ulcer), K30 (gastritis and duodenitis), K31 (other diseases of stomach and duodenum), K32 (other diseases of digestive system, includes GI hemorrhage), K55.4 (increased secretion of gastric)

1. Chronic use operationalized as prescription > 3 months

\*Avoid chronic use, unless other alternatives are not effective and patient can take gastroprotective agent (proton pump inhibitor or misoprostol). Not able to factor in whether other alternatives have been tried and many people buy PPI OTC.

1. Not able to assign symptomatic vs asymptomatic heart failure. Instead, we require > 30 day prescription for NSAID to not penalize short-term prescriptions for NSAIDs which may be warranted.

1. Not able to assign symptomatic vs asymptomatic heart failure.

1. Not able to assign symptomatic vs asymptomatic heart failure.

1. Not able to assign symptomatic vs asymptomatic heart failure.

1. Not able to assign symptomatic vs asymptomatic heart failure.

1. Not able to assign symptomatic vs asymptomatic heart failure.

| METADATA ID | METADATA Description                                                                    | METADATA                                                                                                                                                                                                    | A Medication code                                                                                                                                                                                                                                                                             | B Diagnosis code | C Diagnosis code | D Diagnosis code | E Diagnosis code | RISK | CODE | NOTES                                                                         | Limitations/Hours                                                                                     |
|-------------|-----------------------------------------------------------------------------------------|-------------------------------------------------------------------------------------------------------------------------------------------------------------------------------------------------------------|-----------------------------------------------------------------------------------------------------------------------------------------------------------------------------------------------------------------------------------------------------------------------------------------------|------------------|------------------|------------------|------------------|------|------|-------------------------------------------------------------------------------|-------------------------------------------------------------------------------------------------------|
|             | ACEIs in syncope                                                                        | Patients whose syncope was related to avoided in older adults whose syncope may be due to bradycardia                                                                                                       | Medication variable<br>chl                                                                                                                                                                                                                                                                    |                  |                  |                  |                  |      |      | Pulse < 50 bpm measured heart rate less than 50 during face to face interview | A<br>A & B   C   D   E                                                                                |
|             | Non-selective peripheral alpha-2 blockers in syncope                                    | Non-selective peripheral alpha-2 blockers cause orthostatic blood pressure changes and should be avoided in older adults whose syncope may be due to orthostatic hypotension.                               | Medication variable<br>alpha_2_blockers                                                                                                                                                                                                                                                       |                  |                  |                  |                  |      |      |                                                                               | A<br>A & B   C                                                                                        |
|             | Tertiary TCAs in syncope                                                                | Tertiary TCAs increase the risk of orthostatic hypotension or bradycardia                                                                                                                                   | Medication variable<br>tca_tertiary                                                                                                                                                                                                                                                           |                  |                  |                  |                  |      |      |                                                                               | A<br>A & B   C   D   E                                                                                |
|             | Antipsychotics in syncope                                                               | Chlorpromazine, thioridazine, and olanzapine increase the risk of orthostatic hypotension or bradycardia                                                                                                    | Medication variable<br>antipsychotics_blockers_3                                                                                                                                                                                                                                              |                  |                  |                  |                  |      |      |                                                                               | A<br>A & B   C   D   E                                                                                |
|             | Medications in setting of delirium                                                      | Anticholinergics, antipsychotics, benzos, H2 antagonists, barbit, ropivacaine                                                                                                                               | Omitted due to difficulty in operationalizing in fair manner from claims data.                                                                                                                                                                                                                |                  |                  |                  |                  |      |      |                                                                               |                                                                                                       |
|             | Certain medications with history of falls or fractures                                  | Antipsychotics, antipsychotics, benzos, antidepressants, opioids                                                                                                                                            | Omitted due to difficulty in operationalizing in fair manner from claims data. Benz criteria does not say to avoid in general but has certain cautions such as "avoid unless safer alternatives are not available" or "avoid except for pain management in the setting of severe acute pain." |                  |                  |                  |                  |      |      |                                                                               |                                                                                                       |
|             | Antiemetics (metoclopramide, prochlorperazine, promethazine) in Parkinson disease       | Avoid anti-emetics with anti-dopaminergic properties due to potential to worsen parkinsonian symptoms                                                                                                       | Medication variable<br>antiemetic_blockers                                                                                                                                                                                                                                                    |                  |                  |                  |                  |      |      |                                                                               | A & B                                                                                                 |
|             | Antipsychotics (except aripiprazole, risperidone, and ziprasidone) in Parkinson disease | Avoid dopamine-receptor antagonists due to potential to worsen parkinsonian symptoms                                                                                                                        | Medication variable<br>antipsychotics_blockers_park                                                                                                                                                                                                                                           |                  |                  |                  |                  |      |      |                                                                               | A & B                                                                                                 |
|             | Aspirin > 325 mg/day with history of gastric or duodenal ulcers                         | Aspirin > 325 mg/day may exacerbate existing ulcers or cause new/additional ulcers                                                                                                                          | Medication variable<br>aspirin_high_dose                                                                                                                                                                                                                                                      |                  |                  |                  |                  |      |      |                                                                               | Omitted due to variety of prescription for aspirin                                                    |
|             | Non-COX-2-selective NSAIDs with history of gastric or duodenal ulcers                   | Avoid non-COX-2-selective NSAIDs with history of gastric/duodenal ulcers unless other alternatives are not available and patient can take gastroprotective agent (ie, proton pump inhibitor or misoprostol) | Medication variable<br>nsaid_3                                                                                                                                                                                                                                                                |                  |                  |                  |                  |      |      |                                                                               | Many people likely get PPI OTC                                                                        |
|             | NSAIDs in CDD stage 4 or higher (baseline clearance < 30)                               | Avoid NSAIDs (all) in CDD stage 4 or higher                                                                                                                                                                 | Laboratory value<br>nsaid                                                                                                                                                                                                                                                                     |                  |                  |                  |                  |      |      |                                                                               | eGFR < 30 based on Creatinine C conversion when collected during HHS blood draw<br>A<br>A & B   C     |
|             | Estrogen in urinary incontinence in women                                               | Avoid estrogen oral and transdermal (includes intravaginal estrogen) in women with urinary incontinence (all types)                                                                                         | Medication variable<br>estrogens                                                                                                                                                                                                                                                              |                  |                  |                  |                  |      |      |                                                                               | A & female<br>A & female & B<br>1. Estrogen medication variable definition excludes non-oral estrogen |
|             | Peripheral alpha-2 blockers in women with urinary incontinence                          | Avoid peripheral alpha-2 blockers (doxazosin, prazosin, and terazosin) in women with urinary incontinence (all types)                                                                                       | Medication variable<br>alpha_2_blockers                                                                                                                                                                                                                                                       |                  |                  |                  |                  |      |      |                                                                               | A & female<br>A & female & B                                                                          |
|             | Strongly anticholinergic drugs with LUTS/PH                                             | Strongly anticholinergic drugs (from Table 7 in LUTS/PH), except antimuscarinics for urinary incontinence                                                                                                   | Medication variable<br>anticholinergics_table_7_no_antimuscarinics                                                                                                                                                                                                                            |                  |                  |                  |                  |      |      |                                                                               | A & male<br>A & male & B   C                                                                          |
|             | Aspirin for primary prevention of CVD and CRC                                           | Use with caution in adults > 75 years for primary prevention of CVD and CRC                                                                                                                                 | Medication variable<br>aspirin                                                                                                                                                                                                                                                                |                  |                  |                  |                  |      |      |                                                                               | Omitted as very few people were receiving aspirin prescribed                                          |
|             | Salicylates and NSAIDs                                                                  | Use salicylates and NSAIDs with caution for treatment of PPI or ARI in adults > 75 years                                                                                                                    | Medication variable<br>salicylates_nsaids                                                                                                                                                                                                                                                     |                  |                  |                  |                  |      |      |                                                                               | Omitted as this is a "use with caution criterion"                                                     |
|             | Pravastatin                                                                             | Use with caution in adults > 75 years                                                                                                                                                                       | Medication variable<br>pravastatin                                                                                                                                                                                                                                                            |                  |                  |                  |                  |      |      |                                                                               | Omitted as this is a "use with caution criterion"                                                     |
|             | Certain medications due to associated drug-drug interactions (DDIs)                     | Use with caution antipsychotics, antidepressants, diuretics, intravenous, NSAIDs, opioids, TCAs, tramadol                                                                                                   | Medication variable<br>ddi_blockers                                                                                                                                                                                                                                                           |                  |                  |                  |                  |      |      |                                                                               | Omitted as this is a "use with caution criterion"                                                     |
|             | Dexamethasone/quinidine                                                                 | Use with caution due to limited efficacy doses not apply to treatment of PRA                                                                                                                                | Medication variable<br>dexamethasone_quinidine                                                                                                                                                                                                                                                |                  |                  |                  |                  |      |      |                                                                               | Omitted as this is a "use with caution criterion"                                                     |
|             | TMP-SMX                                                                                 | Use TMP-SMX with caution in patients on ACE or ARB and decreased creatinine clearance                                                                                                                       | Medication variable<br>tmp_smx                                                                                                                                                                                                                                                                |                  |                  |                  |                  |      |      |                                                                               | Omitted as this is a "use with caution criterion"                                                     |



| Drug Class                                       | Interaction                                                                                                                                                                              | ICD9 / CCS for Drug A                      | ICD9 / CCS for Drug B                                                                                      | Medication variable                                                                                        | Medication code A | Medication code B | RISK      | CODE                                  | NOTES                                                                          | Limitations/Issues                                                                                                                                                                                                     |
|--------------------------------------------------|------------------------------------------------------------------------------------------------------------------------------------------------------------------------------------------|--------------------------------------------|------------------------------------------------------------------------------------------------------------|------------------------------------------------------------------------------------------------------------|-------------------|-------------------|-----------|---------------------------------------|--------------------------------------------------------------------------------|------------------------------------------------------------------------------------------------------------------------------------------------------------------------------------------------------------------------|
| NS3 inhibitor combined                           | NS3 inhibitor (ACE, ARB, aldosterone) or potassium-sparing diuretic (amilofedil, triamterene) and another NS3 inhibitor                                                                  | K09 / CCS for K20<br>K20.0 / CCS for K20.0 | ACE, ARB, aldosterone, or potassium-sparing diuretic                                                       | ICD9 close to or higher                                                                                    |                   |                   |           |                                       | Omitted due to difficulty in determining inappropriateness                     |                                                                                                                                                                                                                        |
| Metadate                                         | Metadate Description                                                                                                                                                                     | Metadate                                   | A                                                                                                          | Medication code                                                                                            | B                 | Medication code   | RISK      | CODE                                  | NOTES                                                                          | Limitations/Issues                                                                                                                                                                                                     |
| Opioid and benzodiazepines                       | Increased risk of overdose with opioids and benzodiazepines                                                                                                                              | K09 / CCS for K20<br>K20.0 / CCS for K20.0 | opioids                                                                                                    | benzo                                                                                                      |                   |                   | A & B     | A & B                                 | 1. Requires overlapping prescriptions for opioids and benzodiazepines          |                                                                                                                                                                                                                        |
| Metadate                                         | Metadate Description                                                                                                                                                                     | Metadate                                   | A                                                                                                          | Medication code                                                                                            | B                 | Medication code   | RISK      | CODE                                  | NOTES                                                                          | Limitations/Issues                                                                                                                                                                                                     |
| Opioids and gabapentin/pregabalin                | Increased risk of severe sedation-related adverse events with opioids and gabapentin/pregabalin                                                                                          | K09 / CCS for K20<br>K20.0 / CCS for K20.0 | opioids                                                                                                    | gabapentinoids                                                                                             |                   |                   | A & B     | A & B                                 | 1. Requires overlapping prescriptions for opioids and gabapentin/pregabalin    | Not able to factor in some exceptions, such as transitioning from opioid therapy to gabapentin or pregabalin, or when using gabapentinoids to reduce opioid dose, although caution should be used in all circumstances |
| Metadate                                         | Metadate Description                                                                                                                                                                     | Metadate                                   | A                                                                                                          | Medication code                                                                                            | B                 | Diagnosis code    | RISK      | CODE                                  | NOTES                                                                          | Limitations/Issues                                                                                                                                                                                                     |
| Anticholinergics and anticholinergic             | Increased risk of cognitive decline                                                                                                                                                      | K09 / CCS for K20<br>K20.0 / CCS for K20.0 | Anticholinergic from Table 7                                                                               | Anticholinergic from Table 7                                                                               |                   |                   | A & B     | A & B                                 | 1. Requires overlapping prescription for medications in Table 7 of Beer's list |                                                                                                                                                                                                                        |
| Metadate                                         | Metadate Description                                                                                                                                                                     | Metadate                                   | A                                                                                                          | Medication code                                                                                            | B                 | Medication code   | RISK      | CODE                                  | NOTES                                                                          | Limitations/Issues                                                                                                                                                                                                     |
| Combination of three or more CNS-active drugs    | Antidepressants (TCAs, SSRIs, and SNRIs), antipsychotics, antiepileptics, benzodiazepines and nonbenzodiazepines, benzodiazepine receptor agonist hypnotics (ie, "Z-drugs"), and opioids | K09 / CCS for K20<br>K20.0 / CCS for K20.0 | antidepressants, tca, antiepileptic, antipsychotics_1st_gen, antipsychotics_2nd_gen, benz, z_drug, opioids | antidepressants, tca, antiepileptic, antipsychotics_1st_gen, antipsychotics_2nd_gen, benz, z_drug, opioids |                   |                   | A & B & C | A & B & C (overlapping prescriptions) |                                                                                |                                                                                                                                                                                                                        |
| Metadate                                         | Metadate Description                                                                                                                                                                     | Metadate                                   | A                                                                                                          | Medication code                                                                                            | B                 | Medication code   | RISK      | CODE                                  | NOTES                                                                          | Limitations/Issues                                                                                                                                                                                                     |
| Cardiovascular and NSAIDs (oral or parenteral)   | Avoid due to increased risk of peptic ulcer disease or GI bleeding                                                                                                                       | K09 / CCS for K20<br>K20.0 / CCS for K20.0 | NSAID (includes all NSAID)                                                                                 |                                                                                                            |                   |                   |           |                                       | Omitted due to difficulty in determining inappropriateness                     |                                                                                                                                                                                                                        |
| Metadate                                         | Metadate Description                                                                                                                                                                     | Metadate                                   | A                                                                                                          | Medication code                                                                                            | B                 | Medication code   | RISK      | CODE                                  | NOTES                                                                          | Limitations/Issues                                                                                                                                                                                                     |
| Lithium & ACEs                                   | Avoid due to increased risk of lithium toxicity                                                                                                                                          | K09 / CCS for K20<br>K20.0 / CCS for K20.0 | lithium                                                                                                    | ACE                                                                                                        |                   |                   |           |                                       | Omitted due to difficulty in determining inappropriateness                     |                                                                                                                                                                                                                        |
| Metadate                                         | Metadate Description                                                                                                                                                                     | Metadate                                   | A                                                                                                          | Medication code                                                                                            | B                 | Medication code   | RISK      | CODE                                  | NOTES                                                                          | Limitations/Issues                                                                                                                                                                                                     |
| Lithium and loop diuretics                       | Avoid due to increased risk of lithium toxicity                                                                                                                                          | K09 / CCS for K20<br>K20.0 / CCS for K20.0 | lithium                                                                                                    | loop diuretic                                                                                              |                   |                   |           |                                       | Omitted due to difficulty in determining inappropriateness                     |                                                                                                                                                                                                                        |
| Metadate                                         | Metadate Description                                                                                                                                                                     | Metadate                                   | A                                                                                                          | Medication code                                                                                            | B                 | Medication code   | RISK      | CODE                                  | NOTES                                                                          | Limitations/Issues                                                                                                                                                                                                     |
| Peripheral alpha-1 blockers and loop diuretics   | Avoid peripheral alpha-1 blockers and loop diuretics in older women                                                                                                                      | K09 / CCS for K20<br>K20.0 / CCS for K20.0 | Peripheral alpha-1 blockers (flolanolol, apraclonidine, brimonidine)                                       | loop diuretic                                                                                              |                   |                   |           |                                       | Omitted due to difficulty in determining inappropriateness                     |                                                                                                                                                                                                                        |
| Metadate                                         | Metadate Description                                                                                                                                                                     | Metadate                                   | A                                                                                                          | Medication code                                                                                            | B                 | Medication code   | RISK      | CODE                                  | NOTES                                                                          | Limitations/Issues                                                                                                                                                                                                     |
| Phenazone and TMP-SMX                            | Increased risk of phenytoin toxicity with TMP-SMX                                                                                                                                        | K09 / CCS for K20<br>K20.0 / CCS for K20.0 | phenytoin                                                                                                  | TMP-SMX                                                                                                    |                   |                   |           |                                       | Omitted due to difficulty in determining inappropriateness                     |                                                                                                                                                                                                                        |
| Metadate                                         | Metadate Description                                                                                                                                                                     | Metadate                                   | A                                                                                                          | Medication code                                                                                            | B                 | Medication code   | RISK      | CODE                                  | NOTES                                                                          | Limitations/Issues                                                                                                                                                                                                     |
| Theophylline and cimetidine                      | Increased risk of theophylline toxicity                                                                                                                                                  | K09 / CCS for K20<br>K20.0 / CCS for K20.0 | theophylline                                                                                               | cimetidine                                                                                                 |                   |                   |           |                                       | Omitted due to difficulty in determining inappropriateness                     |                                                                                                                                                                                                                        |
| Metadate                                         | Metadate Description                                                                                                                                                                     | Metadate                                   | A                                                                                                          | Medication code                                                                                            | B                 | Medication code   | RISK      | CODE                                  | NOTES                                                                          | Limitations/Issues                                                                                                                                                                                                     |
| Theophylline and ciprofloxacin                   | Increased risk of theophylline toxicity                                                                                                                                                  | K09 / CCS for K20<br>K20.0 / CCS for K20.0 | theophylline                                                                                               | ciprofloxacin                                                                                              |                   |                   |           |                                       | Omitted due to difficulty in determining inappropriateness                     |                                                                                                                                                                                                                        |
| Metadate                                         | Metadate Description                                                                                                                                                                     | Metadate                                   | A                                                                                                          | Medication code                                                                                            | B                 | Medication code   | RISK      | CODE                                  | NOTES                                                                          | Limitations/Issues                                                                                                                                                                                                     |
| Warfarin and amiodarone                          | Increased risk of bleeding                                                                                                                                                               | K09 / CCS for K20<br>K20.0 / CCS for K20.0 | warfarin                                                                                                   | amiodarone                                                                                                 |                   |                   |           |                                       | Omitted due to difficulty in determining inappropriateness                     |                                                                                                                                                                                                                        |
| Metadate                                         | Metadate Description                                                                                                                                                                     | Metadate                                   | A                                                                                                          | Medication code                                                                                            | B                 | Medication code   | RISK      | CODE                                  | NOTES                                                                          | Limitations/Issues                                                                                                                                                                                                     |
| Warfarin and ciprofloxacin                       | Increased risk of bleeding                                                                                                                                                               | K09 / CCS for K20<br>K20.0 / CCS for K20.0 | warfarin                                                                                                   | ciprofloxacin                                                                                              |                   |                   |           |                                       | Omitted due to difficulty in determining inappropriateness                     |                                                                                                                                                                                                                        |
| Metadate                                         | Metadate Description                                                                                                                                                                     | Metadate                                   | A                                                                                                          | Medication code                                                                                            | B                 | Medication code   | RISK      | CODE                                  | NOTES                                                                          | Limitations/Issues                                                                                                                                                                                                     |
| Warfarin and macrolides (including erythromycin) | Increased risk of bleeding                                                                                                                                                               | K09 / CCS for K20<br>K20.0 / CCS for K20.0 | warfarin                                                                                                   | macrolide (erythromycin)                                                                                   |                   |                   |           |                                       | Omitted due to difficulty in determining inappropriateness                     |                                                                                                                                                                                                                        |
| Metadate                                         | Metadate Description                                                                                                                                                                     | Metadate                                   | A                                                                                                          | Medication code                                                                                            | B                 | Medication code   | RISK      | CODE                                  | NOTES                                                                          | Limitations/Issues                                                                                                                                                                                                     |
| Warfarin and TMP-SMX                             | Increased risk of bleeding                                                                                                                                                               | K09 / CCS for K20<br>K20.0 / CCS for K20.0 | warfarin                                                                                                   | TMP-SMX                                                                                                    |                   |                   |           |                                       | Omitted due to difficulty in determining inappropriateness                     |                                                                                                                                                                                                                        |
| Metadate                                         | Metadate Description                                                                                                                                                                     | Metadate                                   | A                                                                                                          | Medication code                                                                                            | B                 | Medication code   | RISK      | CODE                                  | NOTES                                                                          | Limitations/Issues                                                                                                                                                                                                     |
| Warfarin and NSAIDs                              | Increased risk of bleeding                                                                                                                                                               | K09 / CCS for K20<br>K20.0 / CCS for K20.0 | warfarin                                                                                                   | NSAID (includes all NSAID)                                                                                 |                   |                   |           |                                       | Omitted due to difficulty in determining inappropriateness                     |                                                                                                                                                                                                                        |
| Metadate                                         | Metadate Description                                                                                                                                                                     | Metadate                                   | A                                                                                                          | Medication code                                                                                            | B                 | Medication code   | RISK      | CODE                                  | NOTES                                                                          | Limitations/Issues                                                                                                                                                                                                     |
| Epoprostenol with reduced kidney function        | Dose reduction when CrCl < 30 mL/min                                                                                                                                                     | K09 / CCS for K20<br>K20.0 / CCS for K20.0 | poprostenol                                                                                                |                                                                                                            |                   |                   |           |                                       | Omitted due to difficulty in defining dose reduction                           |                                                                                                                                                                                                                        |
| Metadate                                         | Metadate Description                                                                                                                                                                     | Metadate                                   | A                                                                                                          | Medication code                                                                                            | B                 | Medication code   | RISK      | CODE                                  | NOTES                                                                          | Limitations/Issues                                                                                                                                                                                                     |
| TMP-SMX with reduced kidney function             | Dose reduction if CrCl 15-29 mL/min, avoid if CrCl < 15 mL/min                                                                                                                           | K09 / CCS for K20<br>K20.0 / CCS for K20.0 | tmp_smx                                                                                                    |                                                                                                            |                   |                   |           |                                       | 1. We only focus on CrCl < 30 (not factoring in dose reduction for CrCl 15-29) |                                                                                                                                                                                                                        |
| Metadate                                         | Metadate Description                                                                                                                                                                     | Metadate                                   | A                                                                                                          | Medication code                                                                                            | B                 | Diagnosis code    | RISK      | CODE                                  | NOTES                                                                          | Limitations/Issues                                                                                                                                                                                                     |
| Amiloride with reduced kidney function           | Avoid with CrCl < 30                                                                                                                                                                     | K09 / CCS for K20<br>K20.0 / CCS for K20.0 | amiloride                                                                                                  |                                                                                                            |                   |                   |           |                                       | 1. We only focus on CrCl < 30 (not factoring in dose reduction)                |                                                                                                                                                                                                                        |
| Metadate                                         | Metadate Description                                                                                                                                                                     | Metadate                                   | A                                                                                                          | Medication code                                                                                            | B                 | Diagnosis code    | RISK      | CODE                                  | NOTES                                                                          | Limitations/Issues                                                                                                                                                                                                     |
| Aripiprazole with reduced kidney function        | Avoid with CrCl < 25                                                                                                                                                                     | K09 / CCS for K20<br>K20.0 / CCS for K20.0 | aripiprazole                                                                                               |                                                                                                            |                   |                   |           |                                       | 1. We apply CrCl < 30 as CrCl Stage 4 or higher                                |                                                                                                                                                                                                                        |
| Metadate                                         | Metadate Description                                                                                                                                                                     | Metadate                                   | A                                                                                                          | Medication code                                                                                            | B                 | Diagnosis code    | RISK      | CODE                                  | NOTES                                                                          | Limitations/Issues                                                                                                                                                                                                     |
| Dabigatran with reduced kidney function          | Avoid with CrCl < 30                                                                                                                                                                     | K09 / CCS for K20<br>K20.0 / CCS for K20.0 | dabigatran                                                                                                 |                                                                                                            |                   |                   |           |                                       | 1. We only focus on CrCl < 30 (not factoring in dose reduction)                |                                                                                                                                                                                                                        |
| Metadate                                         | Metadate Description                                                                                                                                                                     | Metadate                                   | A                                                                                                          | Medication code                                                                                            | B                 | Diagnosis code    | RISK      | CODE                                  | NOTES                                                                          | Limitations/Issues                                                                                                                                                                                                     |
| Dofetilide with reduced kidney function          | Reduce dose if CrCl 20-59 mL/min, avoid if CrCl < 20                                                                                                                                     | K09 / CCS for K20<br>K20.0 / CCS for K20.0 | dofetilide                                                                                                 |                                                                                                            |                   |                   |           |                                       | 1. We only focus on CrCl < 20 (not factoring in dose reduction)                |                                                                                                                                                                                                                        |
| Metadate                                         | Metadate Description                                                                                                                                                                     | Metadate                                   | A                                                                                                          | Medication code                                                                                            | B                 | Diagnosis code    | RISK      | CODE                                  | NOTES                                                                          | Limitations/Issues                                                                                                                                                                                                     |
| Edivmab with reduced kidney function             | Reduce dose if CrCl 20-59, avoid if CrCl < 15 or > 95 mL/min                                                                                                                             | K09 / CCS for K20<br>K20.0 / CCS for K20.0 | edivmab                                                                                                    |                                                                                                            |                   |                   |           |                                       | 1. We only focus on CrCl < 15 or > 95                                          |                                                                                                                                                                                                                        |
| Metadate                                         | Metadate Description                                                                                                                                                                     | Metadate                                   | A                                                                                                          | Medication code                                                                                            | B                 | Diagnosis code    | RISK      | CODE                                  | NOTES                                                                          | Limitations/Issues                                                                                                                                                                                                     |
| Enoxaparin with reduced kidney function          | Reduce dose if CrCl < 30                                                                                                                                                                 | K09 / CCS for K20<br>K20.0 / CCS for K20.0 | enoxaparin                                                                                                 |                                                                                                            |                   |                   |           |                                       | Omitted due to difficulty in defining dose reduction                           |                                                                                                                                                                                                                        |
| Metadate                                         | Metadate Description                                                                                                                                                                     | Metadate                                   | A                                                                                                          | Medication code                                                                                            | B                 | Diagnosis code    | RISK      | CODE                                  | NOTES                                                                          | Limitations/Issues                                                                                                                                                                                                     |
| Fondaparinux with reduced kidney function        | Avoid if CrCl < 30                                                                                                                                                                       | K09 / CCS for K20<br>K20.0 / CCS for K20.0 | fondaparinux                                                                                               |                                                                                                            |                   |                   |           |                                       | 1. We only focus on CrCl < 30 (not factoring in dose reduction)                |                                                                                                                                                                                                                        |
| Metadate                                         | Metadate Description                                                                                                                                                                     | Metadate                                   | A                                                                                                          | Medication code                                                                                            | B                 | Diagnosis code    | RISK      | CODE                                  | NOTES                                                                          | Limitations/Issues                                                                                                                                                                                                     |
| Ivabradine with reduced kidney function          | Nonlinear renal filtration; reduce dose if CrCl 15-50 mL/min, avoid if CrCl < 15 mL/min. Venous thromboembolism treatment and for                                                        | K09 / CCS for K20<br>K20.0 / CCS for K20.0 | ivabradine                                                                                                 |                                                                                                            |                   |                   |           |                                       | 1. We only focus on CrCl < 15 (not factoring in dose reduction criteria)       |                                                                                                                                                                                                                        |
| Metadate                                         | Metadate Description                                                                                                                                                                     | Metadate                                   | A                                                                                                          | Medication code                                                                                            | B                 | Diagnosis code    | RISK      | CODE                                  | NOTES                                                                          | Limitations/Issues                                                                                                                                                                                                     |
| Siprovastatin with reduced kidney function       | Avoid if CrCl < 30                                                                                                                                                                       | K09 / CCS for K20<br>K20.0 / CCS for K20.0 | siprovastatin                                                                                              |                                                                                                            |                   |                   |           |                                       | 1. We only focus on CrCl < 30 (not factoring in dose reduction)                |                                                                                                                                                                                                                        |
| Metadate                                         | Metadate Description                                                                                                                                                                     | Metadate                                   | A                                                                                                          | Medication code                                                                                            | B                 | Diagnosis code    | RISK      | CODE                                  | NOTES                                                                          | Limitations/Issues                                                                                                                                                                                                     |
| Triamterene with reduced kidney function         | Avoid if CrCl < 30                                                                                                                                                                       | K09 / CCS for K20<br>K20.0 / CCS for K20.0 | triamterene                                                                                                |                                                                                                            |                   |                   |           |                                       | 1. We only focus on CrCl < 30 (not factoring in dose reduction)                |                                                                                                                                                                                                                        |
| Metadate                                         | Metadate Description                                                                                                                                                                     | Metadate                                   | A                                                                                                          | Medication code                                                                                            | B                 | Diagnosis code    | RISK      | CODE                                  | NOTES                                                                          | Limitations/Issues                                                                                                                                                                                                     |

|                                         |             | Substrate                                                                          |                                                                   | K <sub>12</sub> Dose # or higher | Cystatin C                                 |                                                      |      |           |                                 |
|-----------------------------------------|-------------|------------------------------------------------------------------------------------|-------------------------------------------------------------------|----------------------------------|--------------------------------------------|------------------------------------------------------|------|-----------|---------------------------------|
| Duloxetine with reduced kidney function |             | Avoid if CrCl < 30                                                                 | K209 / CCS for K209<br>K210 / CCS for K210<br>Medication variable | Substrate                        | 385.A, 385.3, 385.6<br>N18.4, N18.5, N18.6 | Calculated eGFR < 30                                 | A    | A & B   C |                                 |
| METADATA                                | METADATA    | METADATA                                                                           | METADATA                                                          | A                                | B                                          | C                                                    | RISK | CODE      | NOTES                           |
| ID                                      | Description | Medication code                                                                    | Diagnosis code                                                    | Laboratory value                 | Cystatin C                                 |                                                      |      |           | Limitations/Hours               |
| Gabapentin with reduced kidney function |             | Reduce dose if CrCl < 60                                                           | K209 / CCS for K209<br>K210 / CCS for K210<br>Medication variable |                                  |                                            | Omitted due to difficulty in defining dose reduction |      |           |                                 |
| METADATA                                | METADATA    | METADATA                                                                           | METADATA                                                          | A                                | B                                          | C                                                    | RISK | CODE      | NOTES                           |
| ID                                      | Description | Medication code                                                                    | Diagnosis code                                                    | Laboratory value                 | Cystatin C                                 |                                                      |      |           | Limitations/Hours               |
| Isoniazid with reduced kidney function  |             | Reduce dose if CrCl < 80                                                           | K209 / CCS for K209<br>K210 / CCS for K210<br>Medication variable |                                  |                                            | Omitted due to difficulty in defining dose reduction |      |           |                                 |
| METADATA                                | METADATA    | METADATA                                                                           | METADATA                                                          | A                                | B                                          | C                                                    | RISK | CODE      | NOTES                           |
| ID                                      | Description | Medication code                                                                    | Diagnosis code                                                    | Laboratory value                 | Cystatin C                                 |                                                      |      |           | Limitations/Hours               |
| Pregabalin with reduced kidney function |             | Reduce dose if CrCl < 60                                                           | K209 / CCS for K209<br>K210 / CCS for K210<br>Medication variable |                                  |                                            | Omitted due to difficulty in defining dose reduction |      |           |                                 |
| METADATA                                | METADATA    | METADATA                                                                           | METADATA                                                          | A                                | B                                          | C                                                    | RISK | CODE      | NOTES                           |
| ID                                      | Description | Medication code                                                                    | Diagnosis code                                                    | Laboratory value                 | Cystatin C                                 |                                                      |      |           | Limitations/Hours               |
| Tramadol with reduced kidney function   |             | Reduce immediate-release dose if CrCl < 30;<br>avoid extended release if CrCl < 30 | K209 / CCS for K209<br>K210 / CCS for K210<br>Medication variable | tramadol ER                      | 385.A, 385.3, 385.6<br>N18.4, N18.5, N18.6 | Calculated eGFR < 30                                 | A    | A & B   C | Omitted dose reduction criteria |
| METADATA                                | METADATA    | METADATA                                                                           | METADATA                                                          | A                                | B                                          | C                                                    | RISK | CODE      | NOTES                           |
| ID                                      | Description | Medication code                                                                    | Diagnosis code                                                    | Laboratory value                 | Cystatin C                                 |                                                      |      |           | Limitations/Hours               |
| Zidovudine with reduced kidney function |             | Reduce dose of immediate, immediate, immediate, or sustained when CrCl < 50        | K209 / CCS for K209<br>K210 / CCS for K210<br>Medication variable |                                  |                                            | Omitted due to difficulty in defining dose reduction |      |           |                                 |
| METADATA                                | METADATA    | METADATA                                                                           | METADATA                                                          | A                                | B                                          | C                                                    | RISK | CODE      | NOTES                           |
| ID                                      | Description | Medication code                                                                    | Diagnosis code                                                    | Laboratory value                 | Cystatin C                                 |                                                      |      |           | Limitations/Hours               |
| Zidovudine with reduced kidney function |             | Reduce dose if CrCl < 30                                                           | K209 / CCS for K209<br>K210 / CCS for K210<br>Medication variable |                                  |                                            | Omitted due to difficulty in defining dose reduction |      |           |                                 |
| METADATA                                | METADATA    | METADATA                                                                           | METADATA                                                          | A                                | B                                          | C                                                    | RISK | CODE      | NOTES                           |
| ID                                      | Description | Medication code                                                                    | Diagnosis code                                                    | Laboratory value                 | Cystatin C                                 |                                                      |      |           | Limitations/Hours               |
| Zidovudine with reduced kidney function |             | Avoid if CrCl < 30                                                                 | K209 / CCS for K209<br>K210 / CCS for K210<br>Medication variable | probenecid                       | 385.A, 385.3, 385.6<br>N18.4, N18.5, N18.6 | Calculated eGFR < 30                                 | A    | A & B   C |                                 |
| METADATA                                | METADATA    | METADATA                                                                           | METADATA                                                          | A                                | B                                          | C                                                    | RISK | CODE      | NOTES                           |
| ID                                      | Description | Medication code                                                                    | Diagnosis code                                                    | Laboratory value                 | Cystatin C                                 |                                                      |      |           | Limitations/Hours               |
